# Supplementary material for: Eremophilane Sesquiterpenes from a Deep Marine-Derived Fungus, Aspergillus sp. SCSIOW2, Cultivated in the Presence of Epigenetic Modifying Agents
Source: PubMed Central journal article supplement (PMC6274295; doi:10.3390/molecules21040473), 2016-04-18
Supplement: molecules-21-00473-s001.pdf [file molecules-21-00473-s001.pdf]

# Supplementary Materials: Eremophilane Sesquiterpenes from a Deep Marine-Derived Fungus, *Aspergillus* sp. SCSIOW2, Cultivated in the Presence of Epigenetic Modifying Agents

Liyan Wang, Mengjie Li, Jianqiang Tang and Xiaofan Li

**Table S1.** Conformer distribution of 1 in solvated models (methanol) calculation at the B3LYP/aug-cc-PVDZ level.

| Conformers | Contribution % |
|------------|----------------|
| 1          | 26.05          |
| 2          | 19.17          |
| 3          | 19.17          |
| 4          | 14.77          |
| 5          | 6.69           |
| 6          | 5.01           |
| 7          | 4.03           |
| 8          | 2.25           |
| 9          | 2.25           |
| 10         | 0.61           |

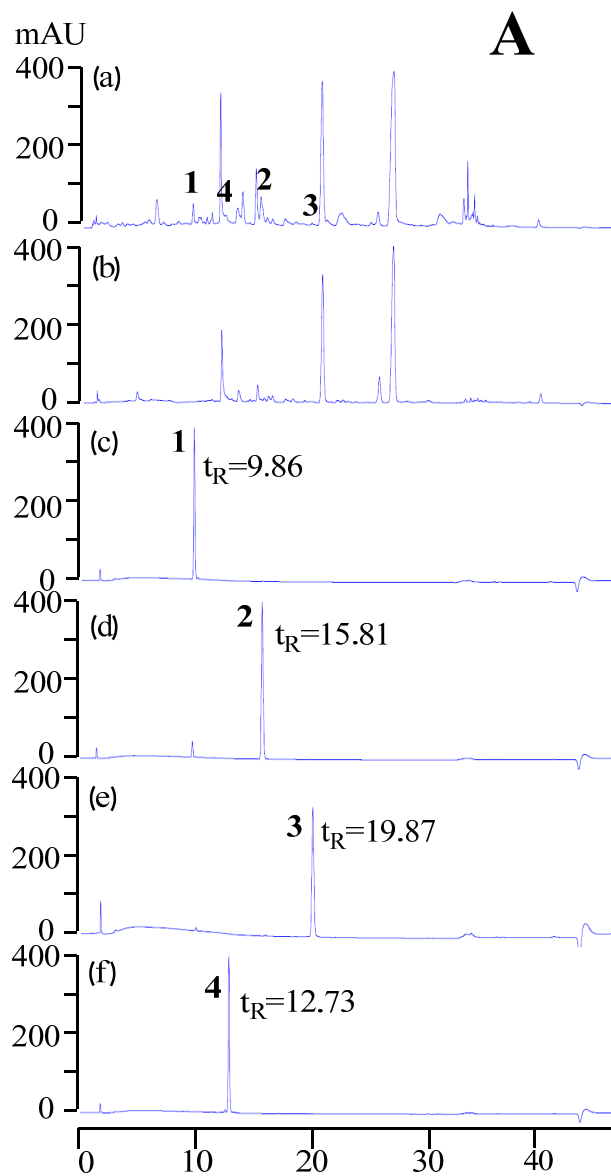

Figure S1. Cont.

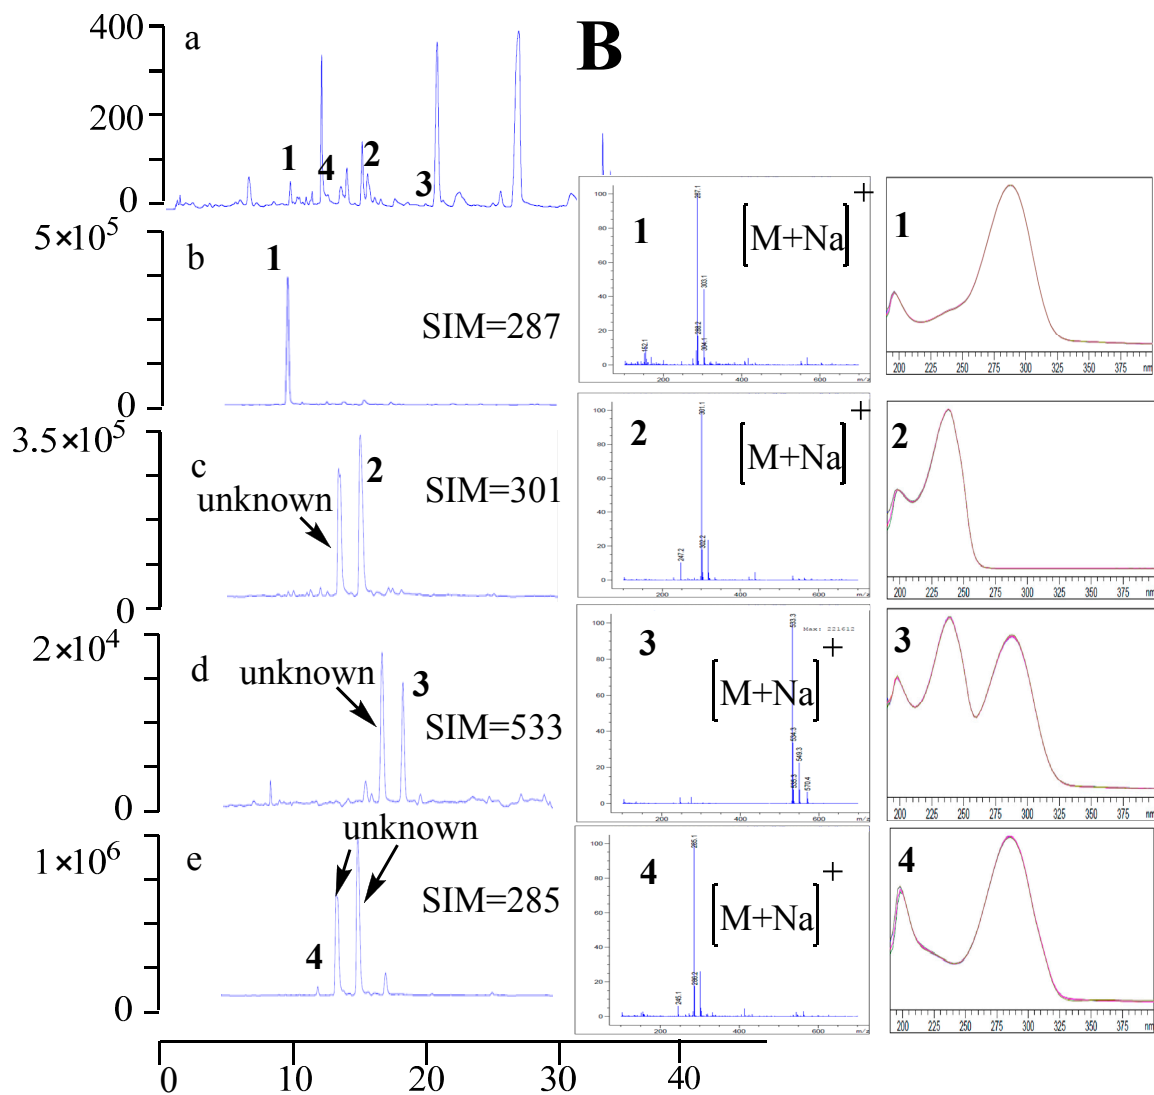

Figure S1. Cont.

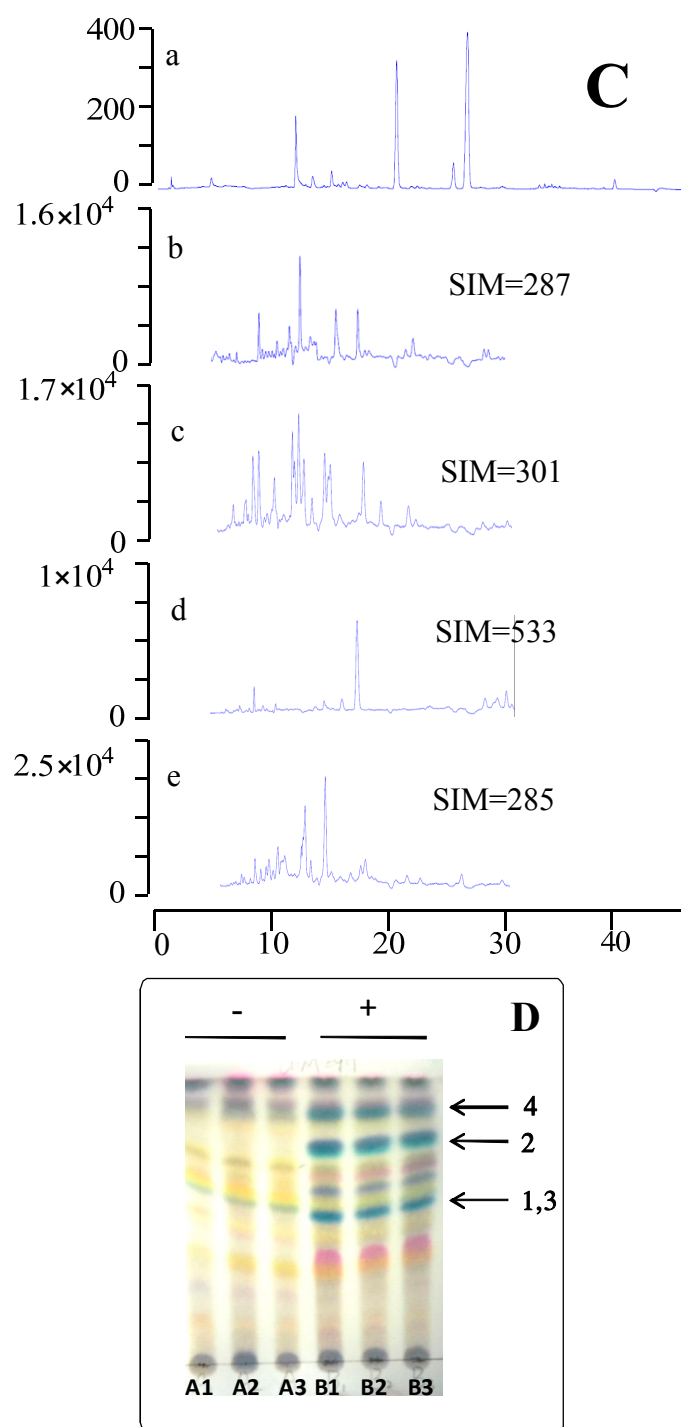

**Figure S1.** Effects of SBHA and 5-AZA on secondary metabolites (SMs) production by *Aspergillus* sp. SCSiOW2. SMs were extracted from one week cultures with (+) or without (-) 1 mM SBHA and 1 mM 5-AZA. (A) HPLC analyses [(a) = +; (b) = -; (c-f) = standards of 1-4]; Effects of SBHA and 5-AZA on secondary metabolites (SMs) production by *Aspergillus* sp. SCSiOW2. SMs were extracted from one week cultures with (+) or without (-) 1 mM SBHA and 1 mM 5-AZA. (B) LCMS analyses of samples with epigenetic modifiers. (a) = HPLC of +; (b-e) = SIM287, 301, 533, 285; Effects of SBHA and 5-AZA on secondary metabolites (SMs) production by *Aspergillus* sp. SCSiOW2. SMs were extracted from one week cultures with (+) or without (-) 1 mM SBHA and 1mM 5-AZA. (C) LCMS analyses of samples without epigenetic modifiers. (a) = HPLC of -; (b-e) = SIM287, 301, 533, 285; Effects of SBHA and 5-AZA on secondary metabolites (SMs) production by *Aspergillus* sp. SCSiOW2. SMs were extracted from one week cultures with (+) or without (-) 1 mM SBHA and 1mM 5-AZA. (D) TLC analysis.

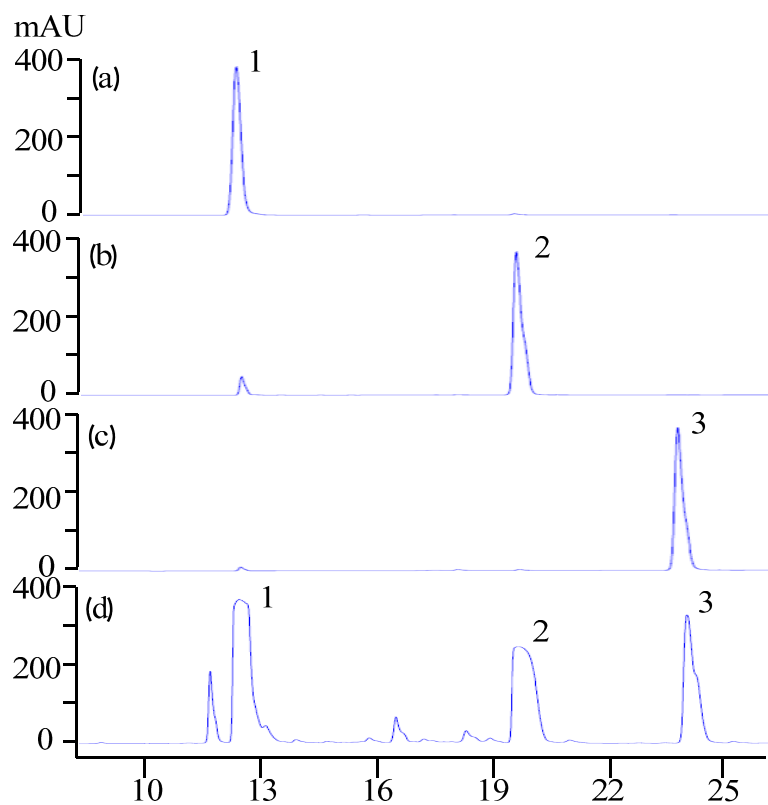

**Figure S2.** HPLC analysis of **1** (a), **2** (b) and **3** (c), and profile of **1** changed to **2** and **3** after storage for 1 week in MeOH:H<sub>2</sub>O (9:1) solution (d); HPLC was performed with a YMC Pack pro ODS C18 column (4.6 × 250 mm I.D. 5 μ) eluted with MeOH-H<sub>2</sub>O (0:100–50:50 from 0 to 10 min; 50:50–80:20 from 10 to 20 min; 1.0 mL/min) with detection at 254 nm.

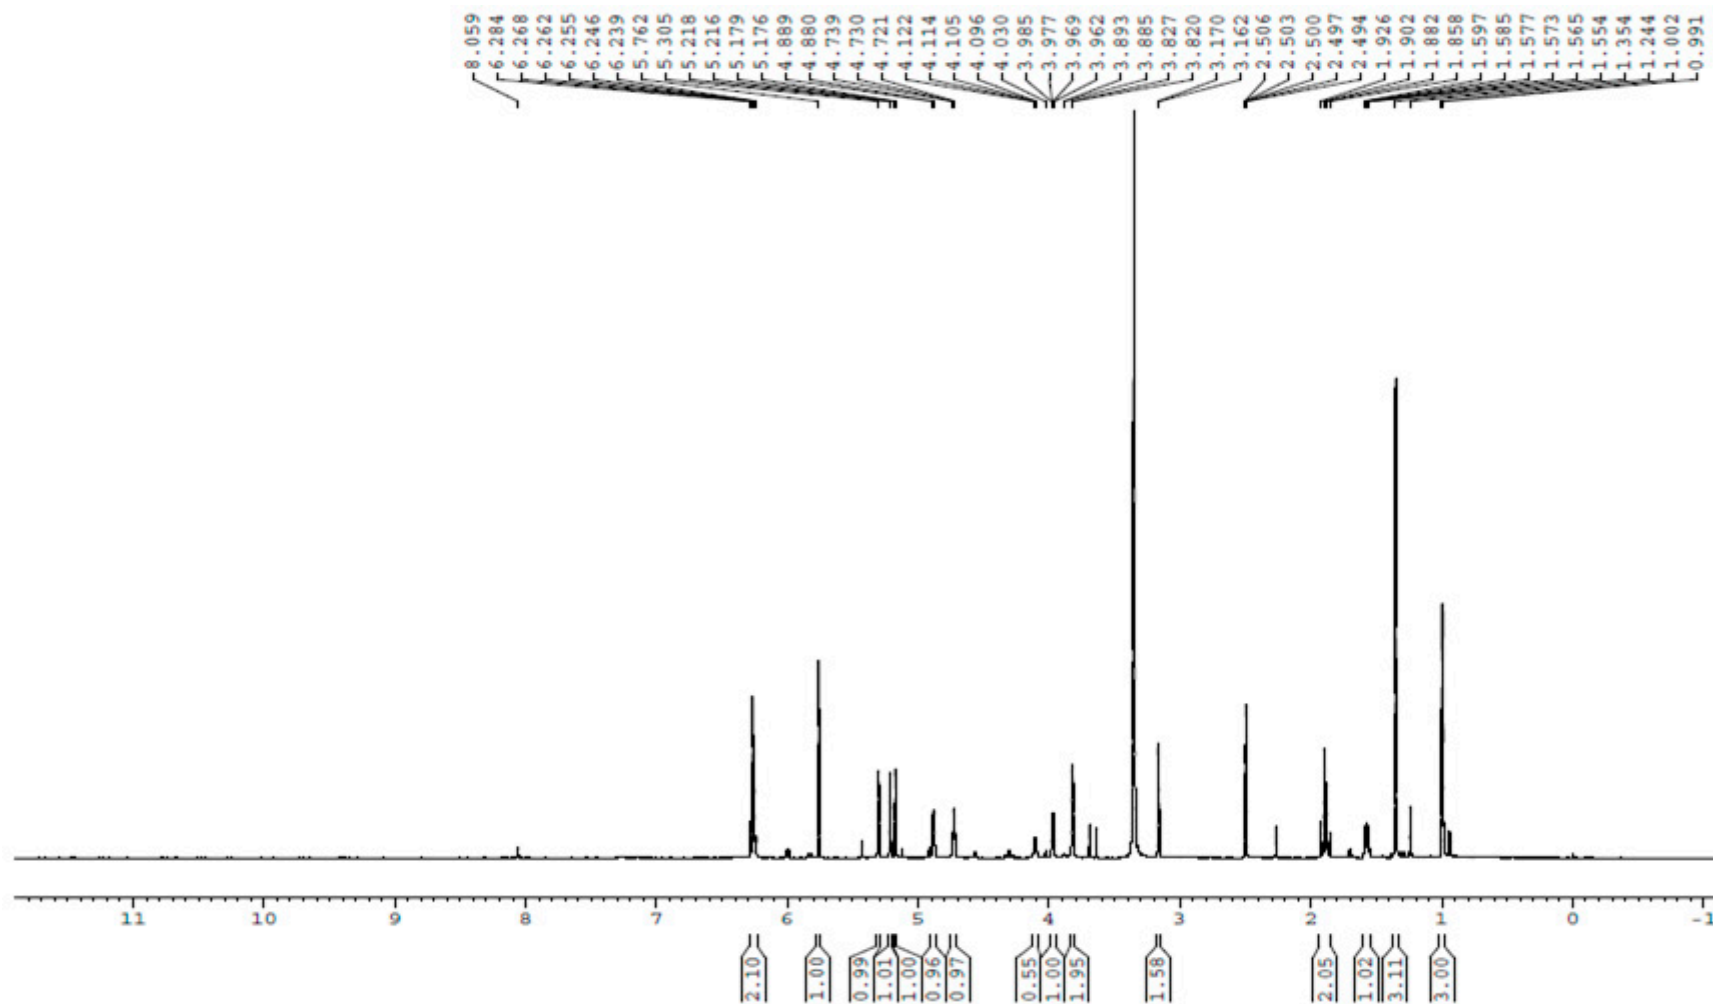

Figure S3. Cont.

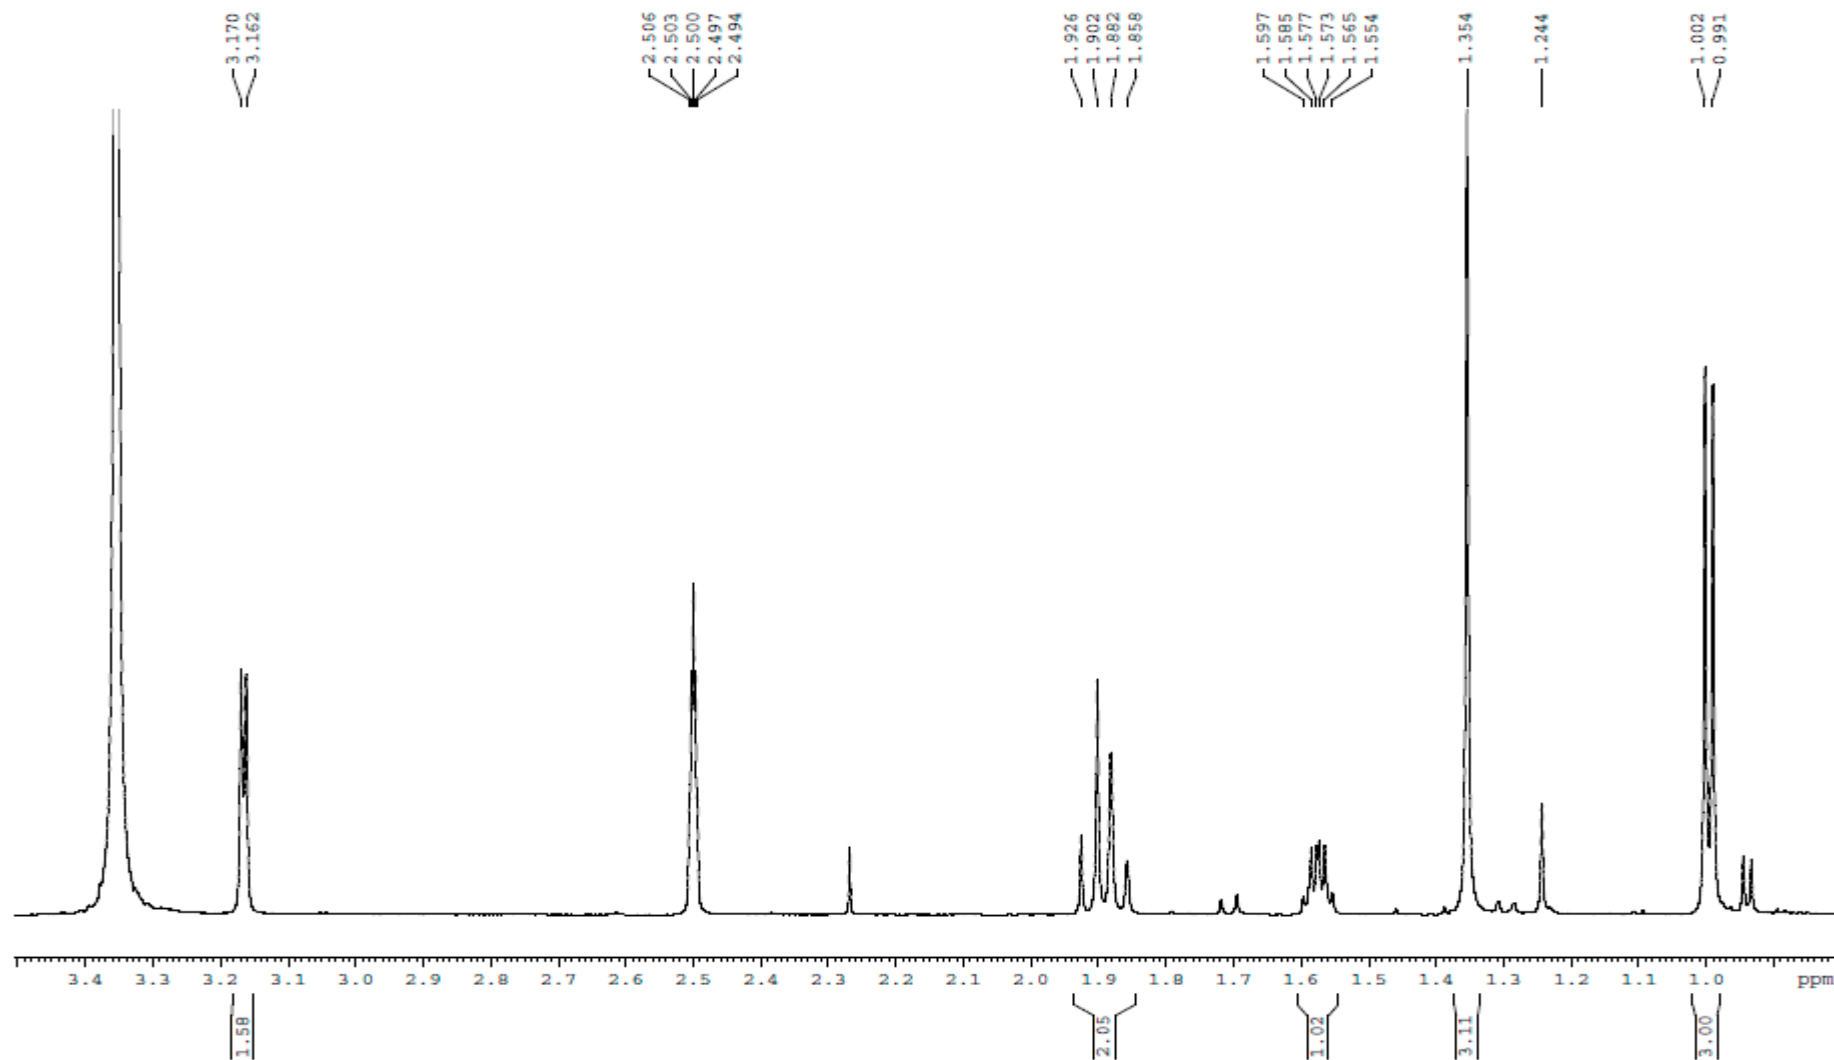

Figure S3. Cont.

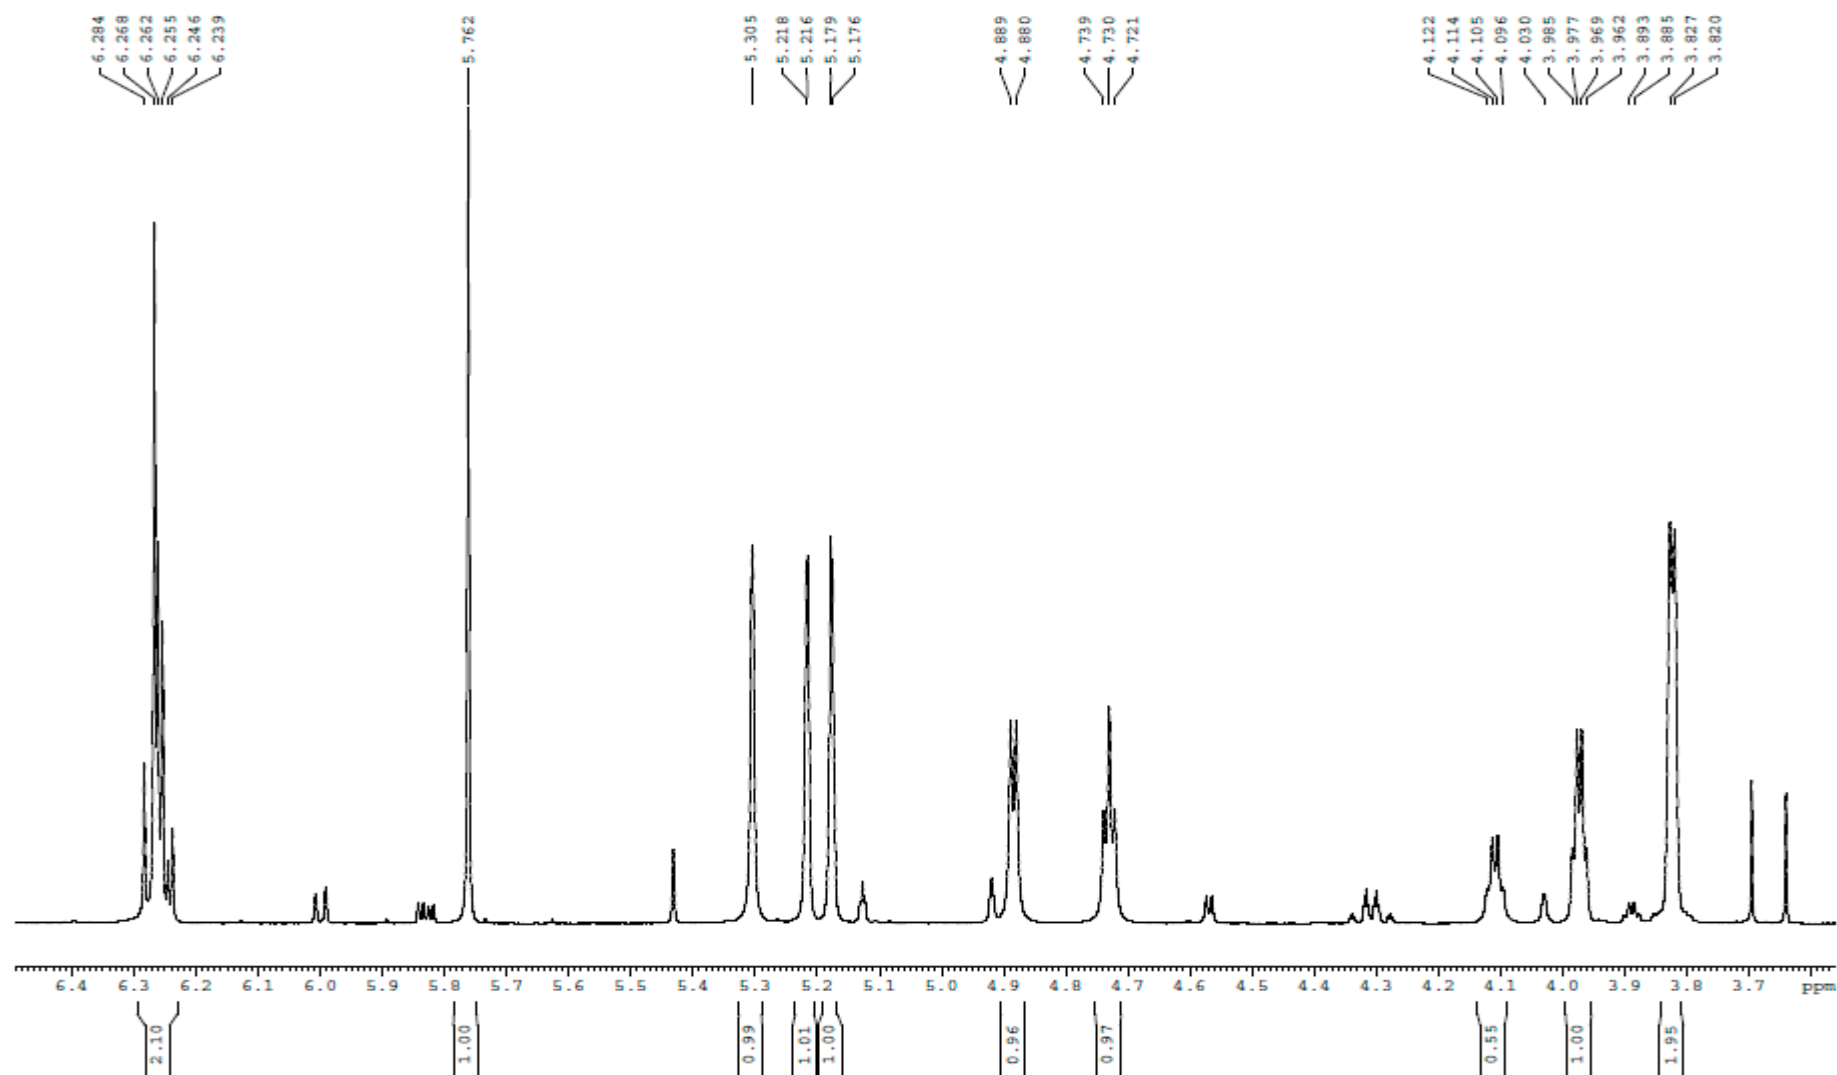

Figure S3. <sup>1</sup>H-NMR spectrum of 1 in DMSO-d<sub>6</sub>.



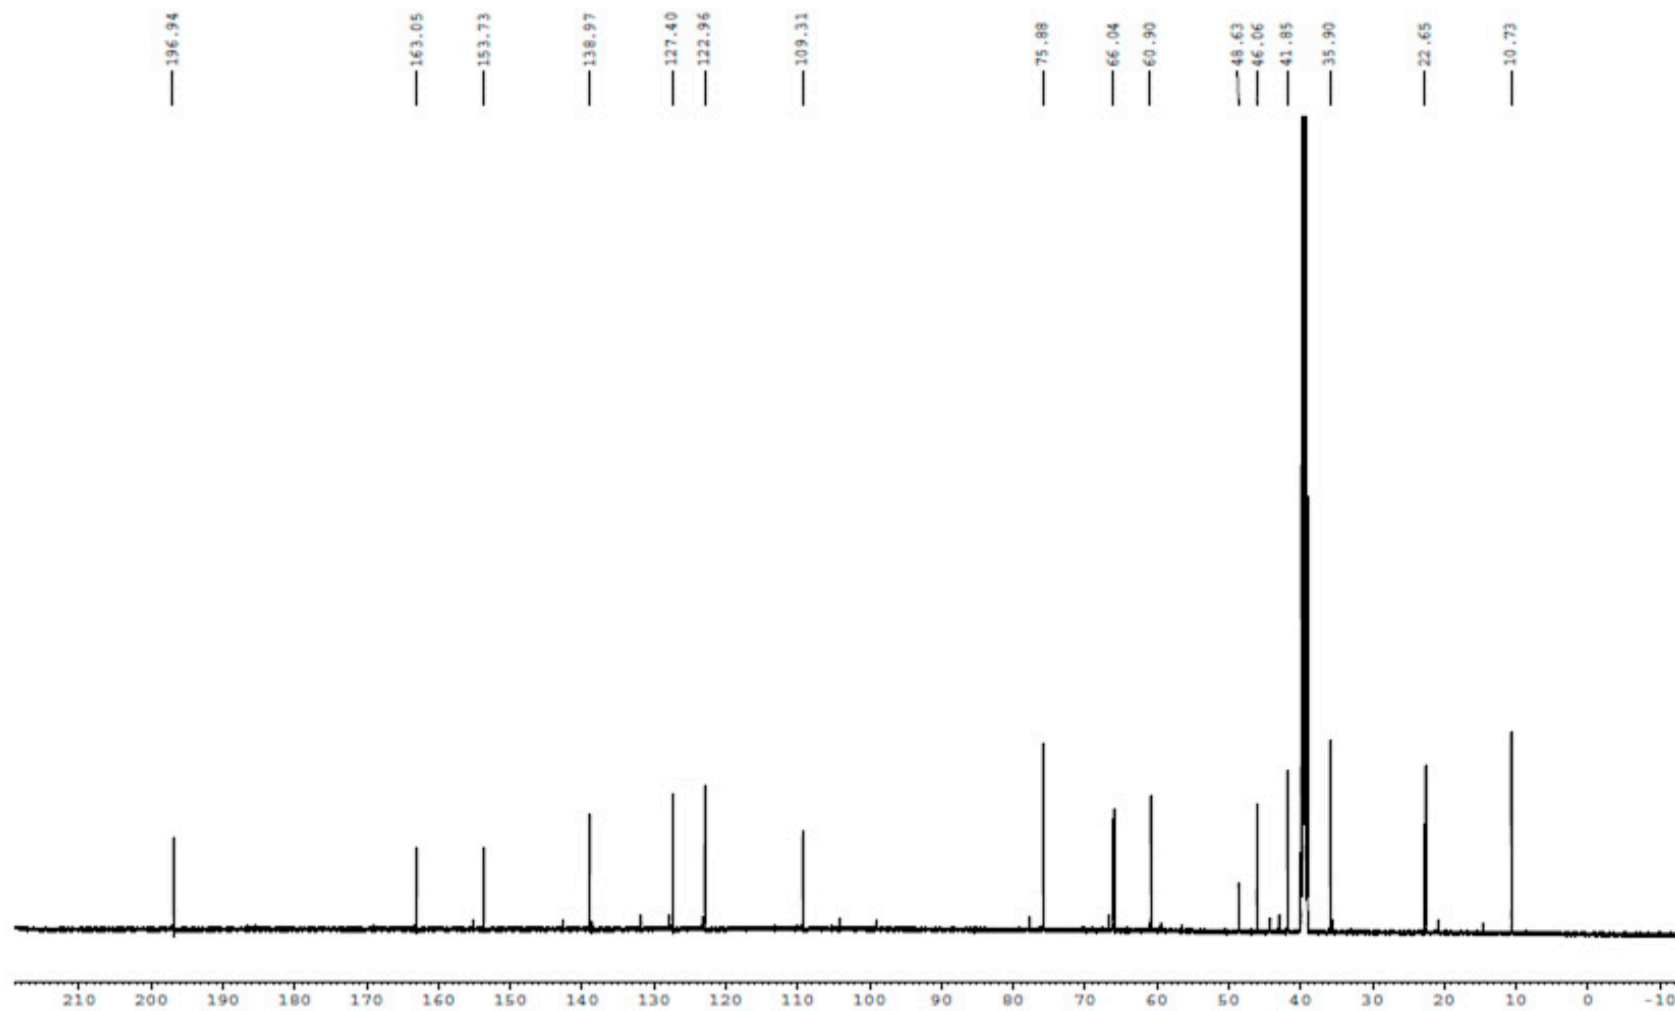

Figure S4. Cont.

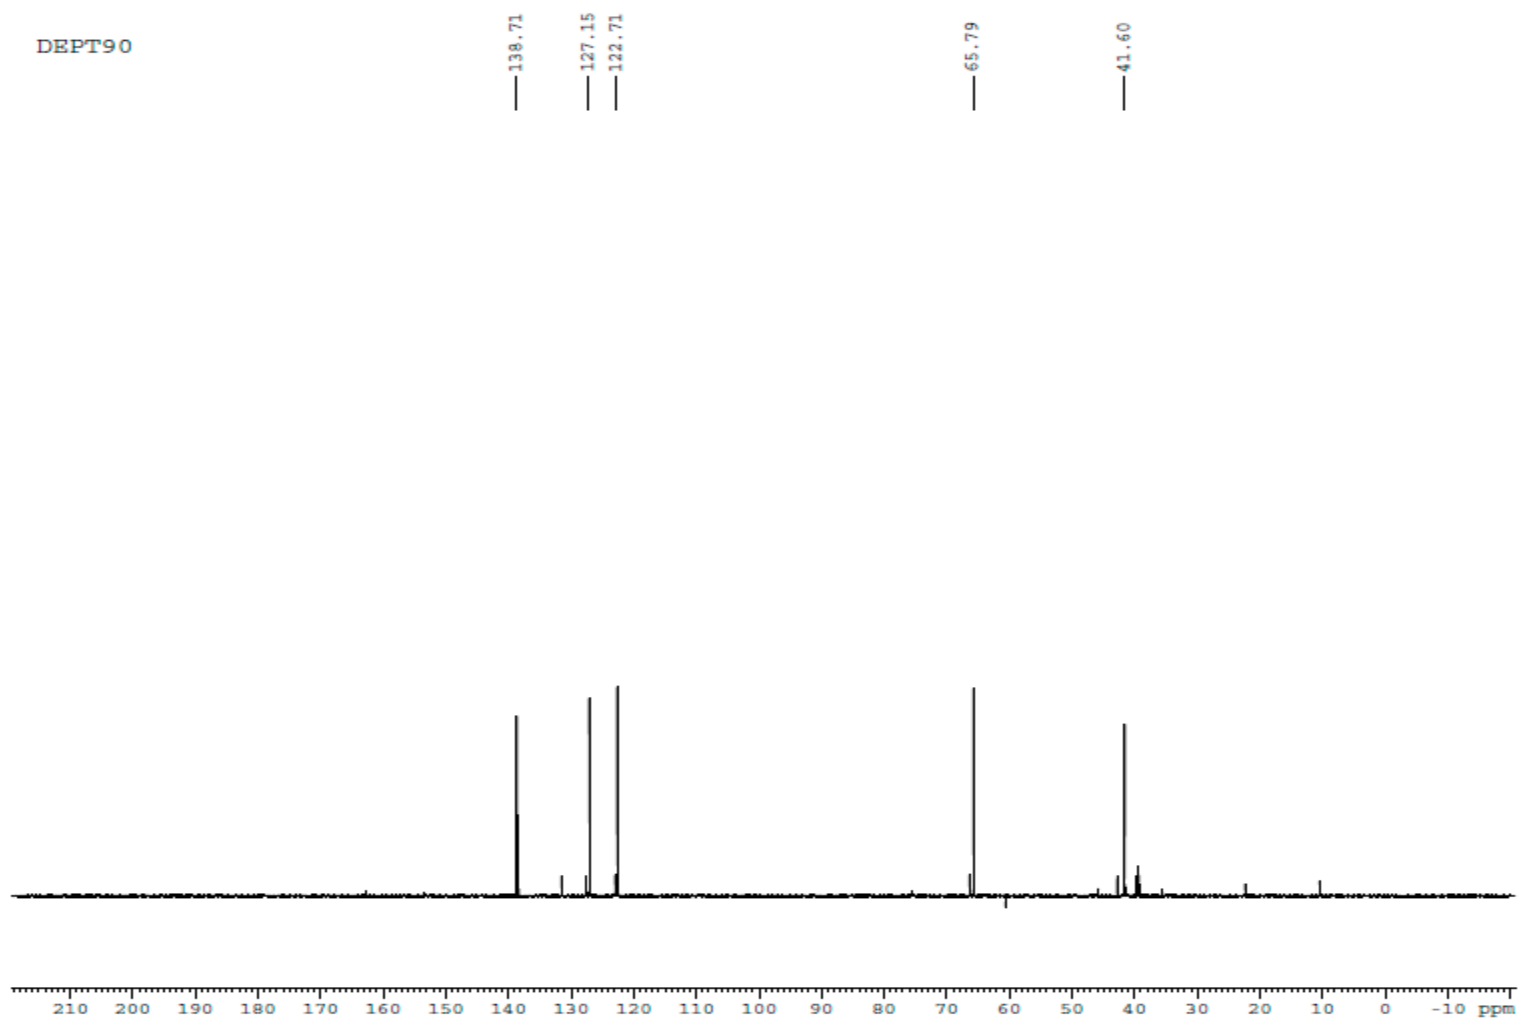

Figure S4. Cont.

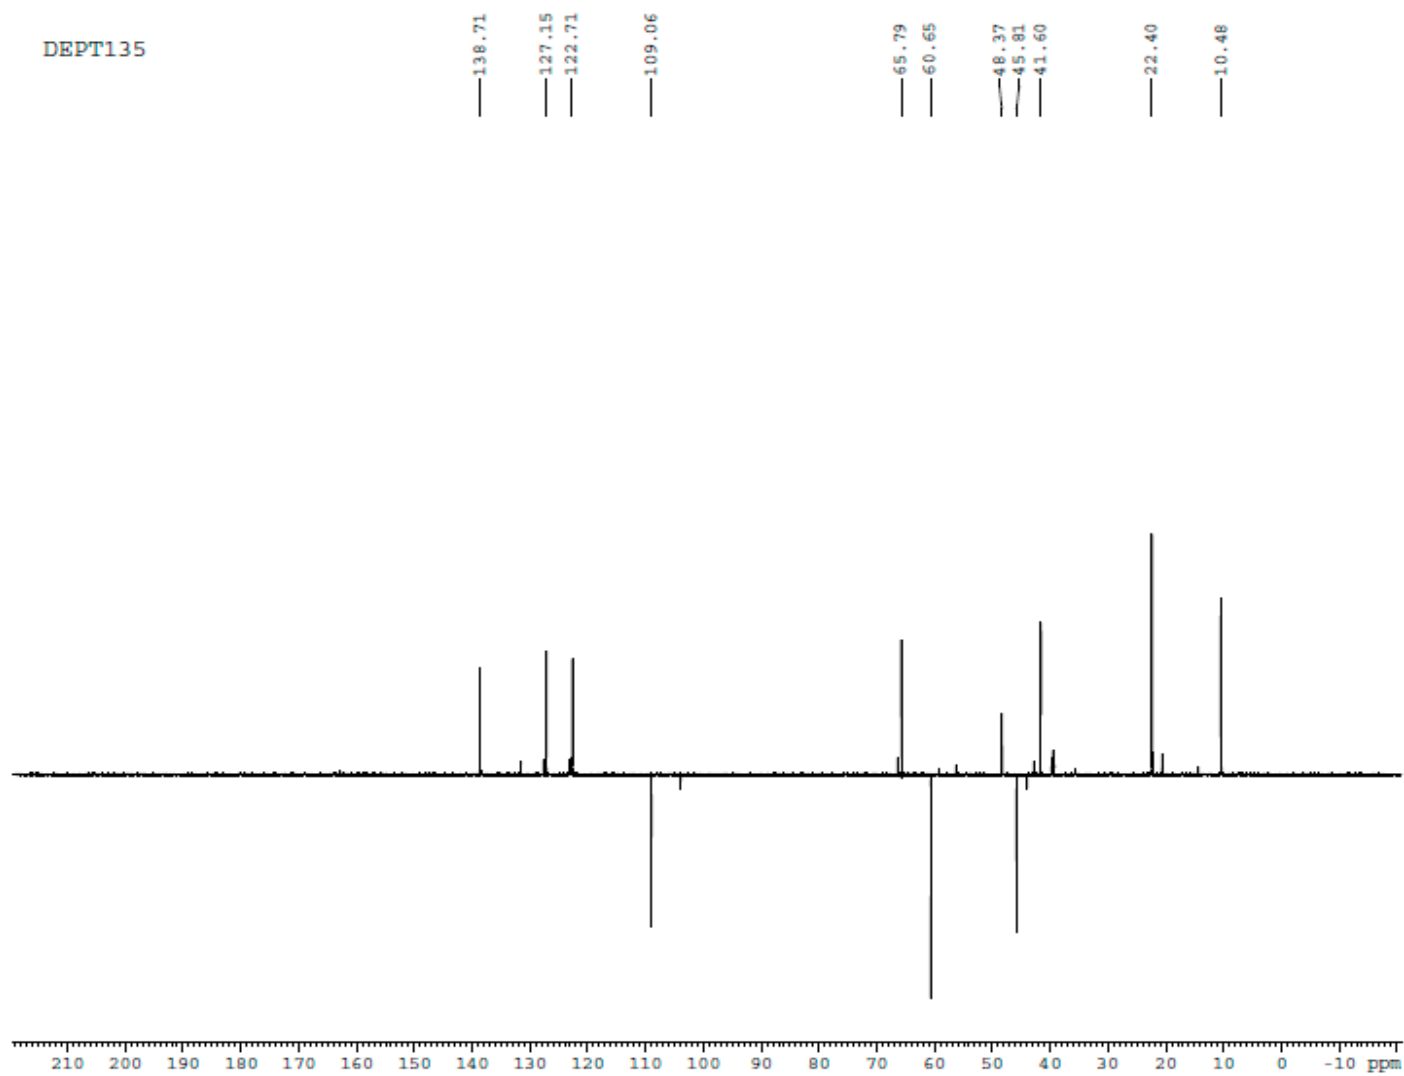

Figure S4.  $^{13}\text{C}$ -NMR spectrum and DEPT of 1 in  $\text{DMSO-}d_6$ .

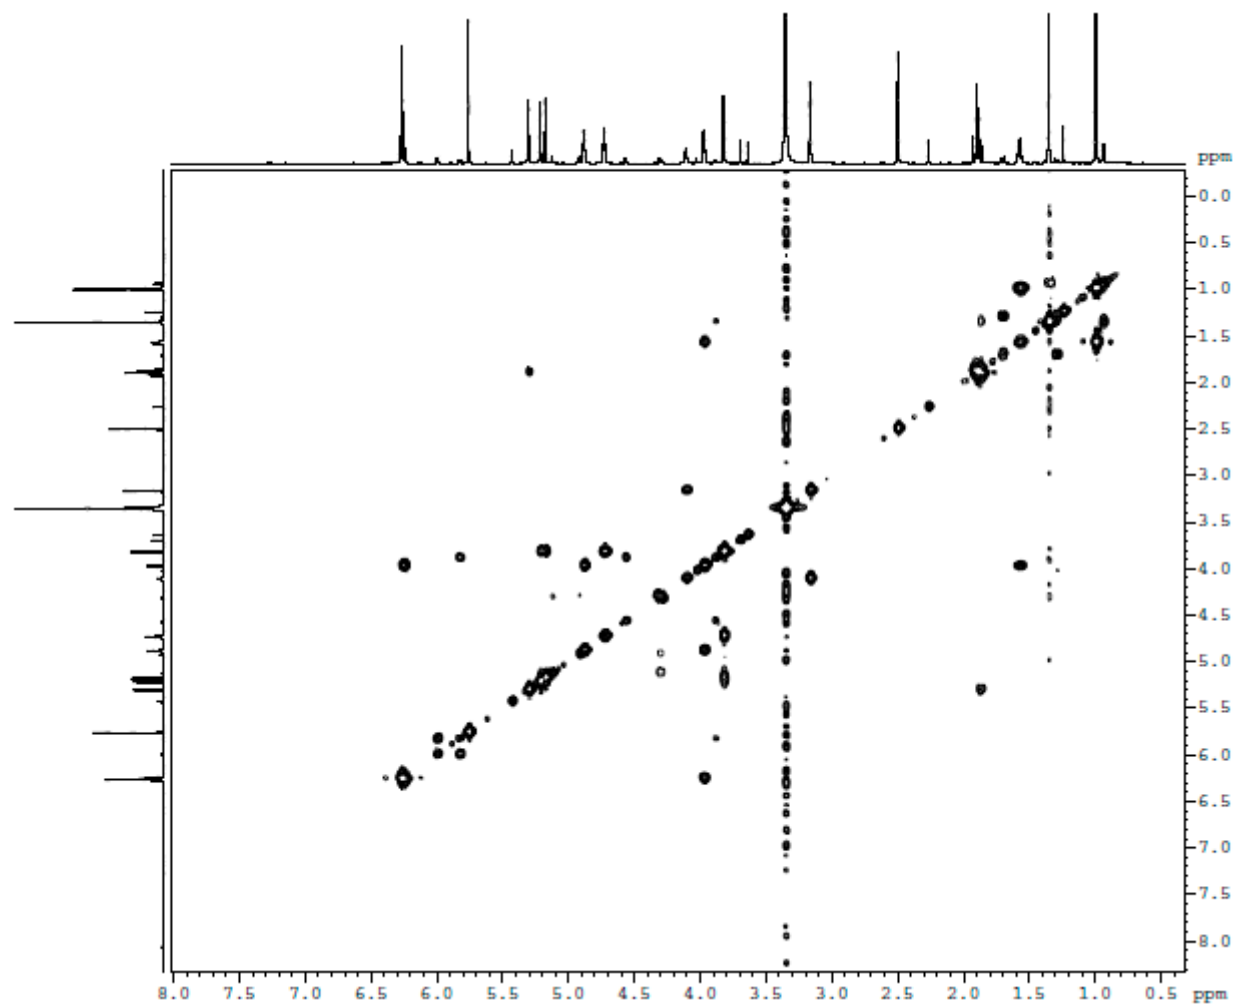

Figure S5.  $^1\text{H}$ - $^1\text{H}$  COSY spectrum of 1 in  $\text{DMSO-}d_6$ .

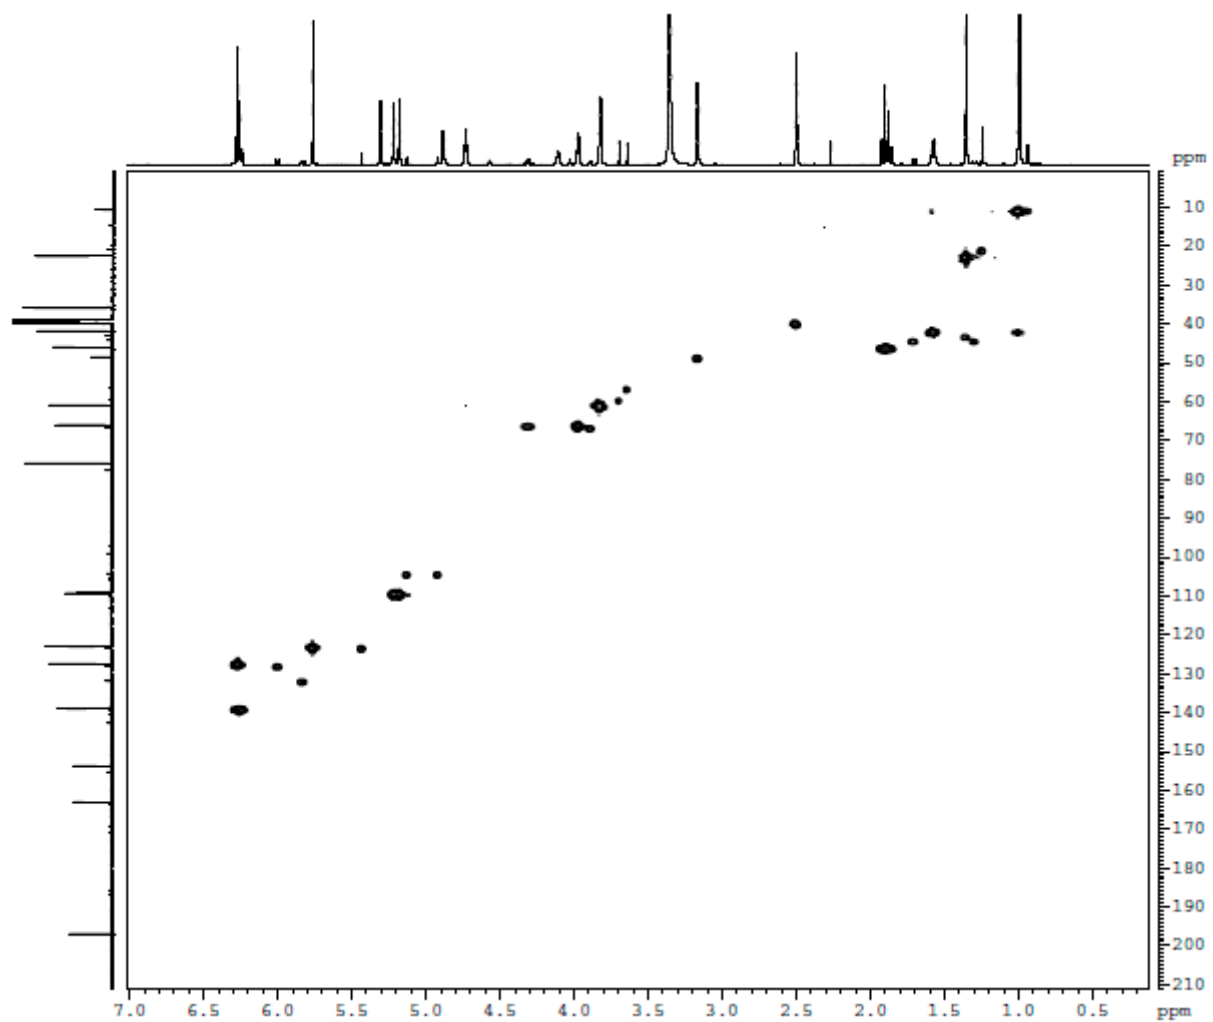

Figure S6. HSQC spectrum of 1 in DMSO-*d*<sub>6</sub>.

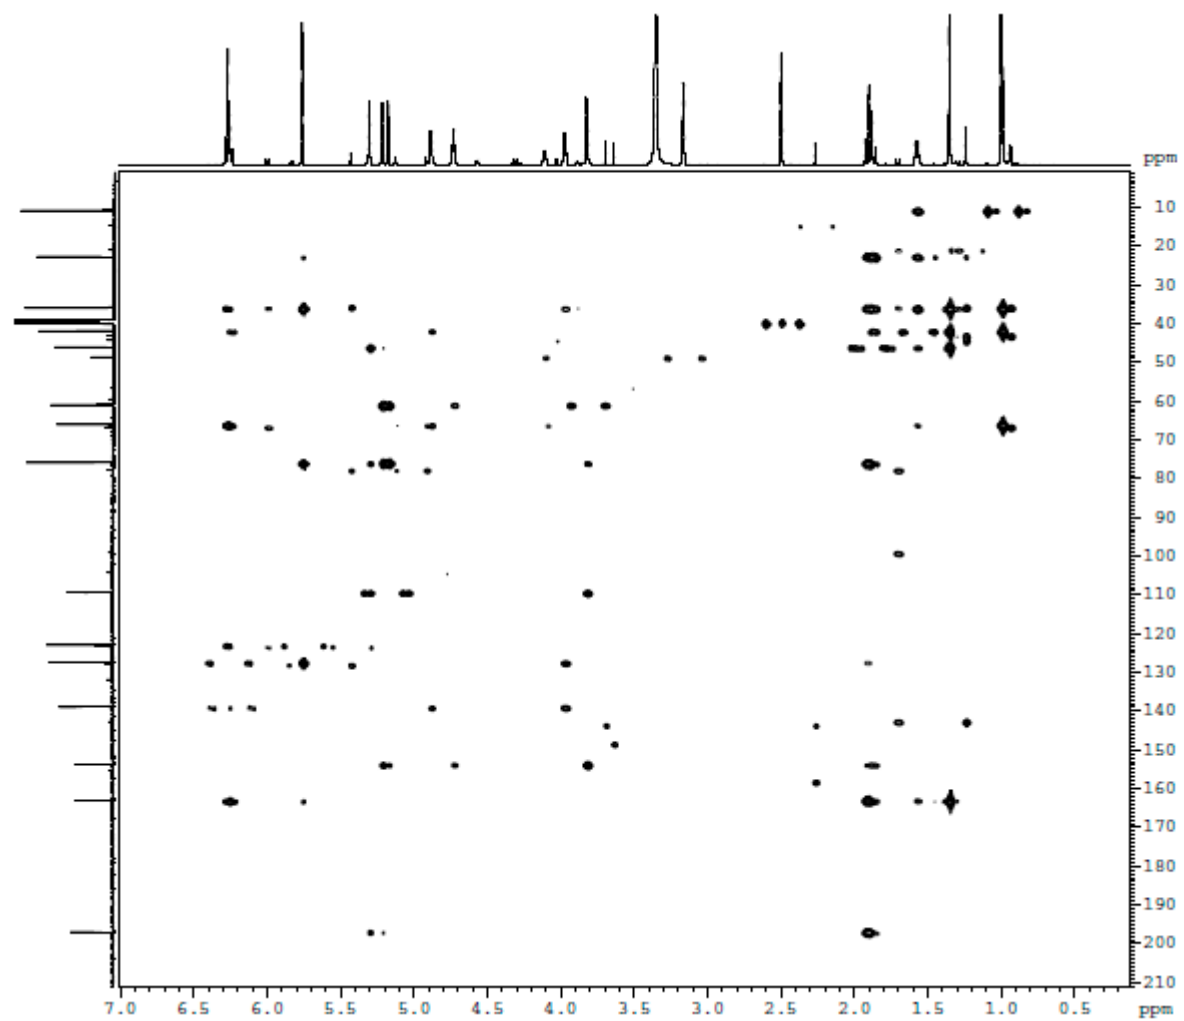

Figure S7. HMBC spectrum of 1 in DMSO-d<sub>6</sub>.

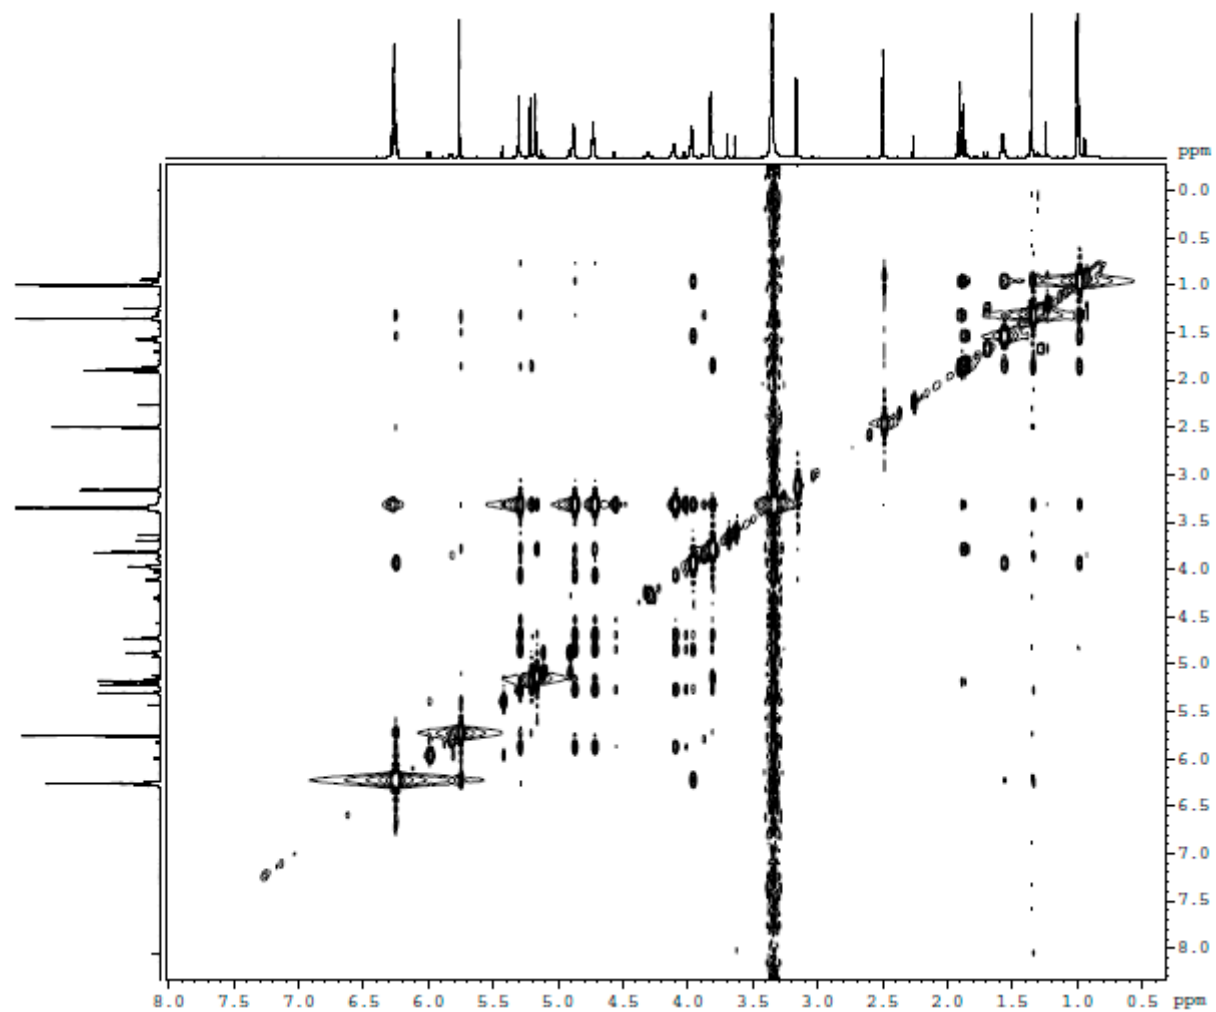

Figure S8. NOESY spectrum of 1 in DMSO-*d*<sub>6</sub>.

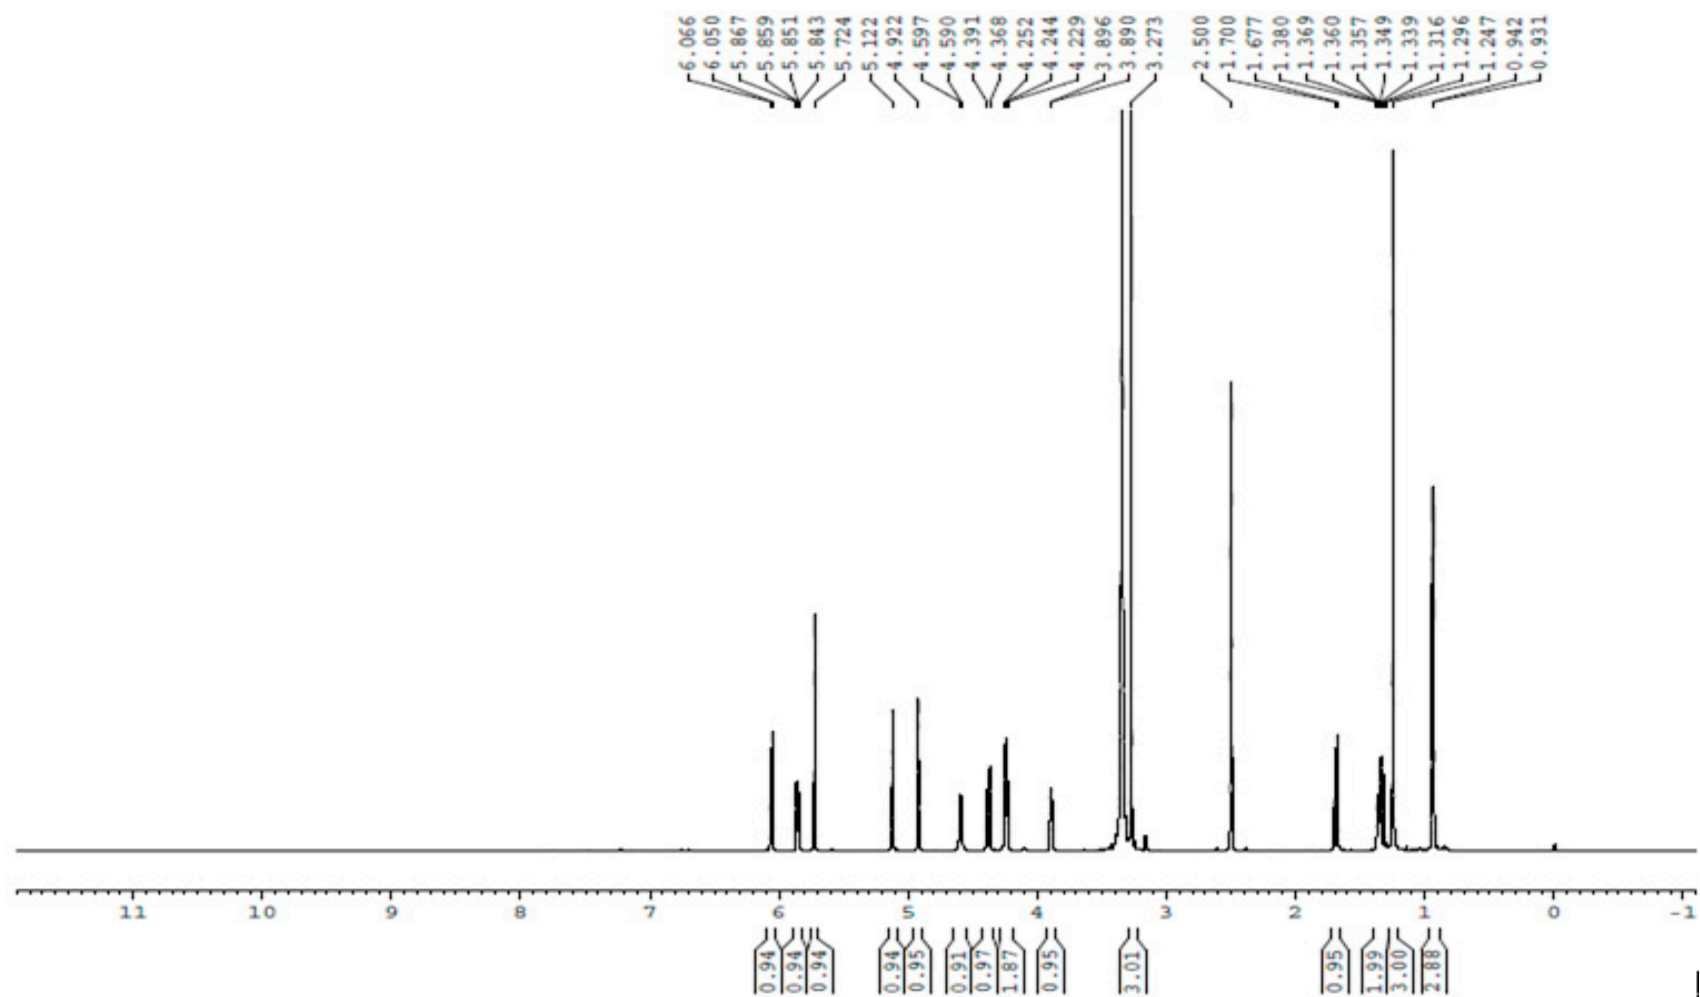

Figure S9. Cont.



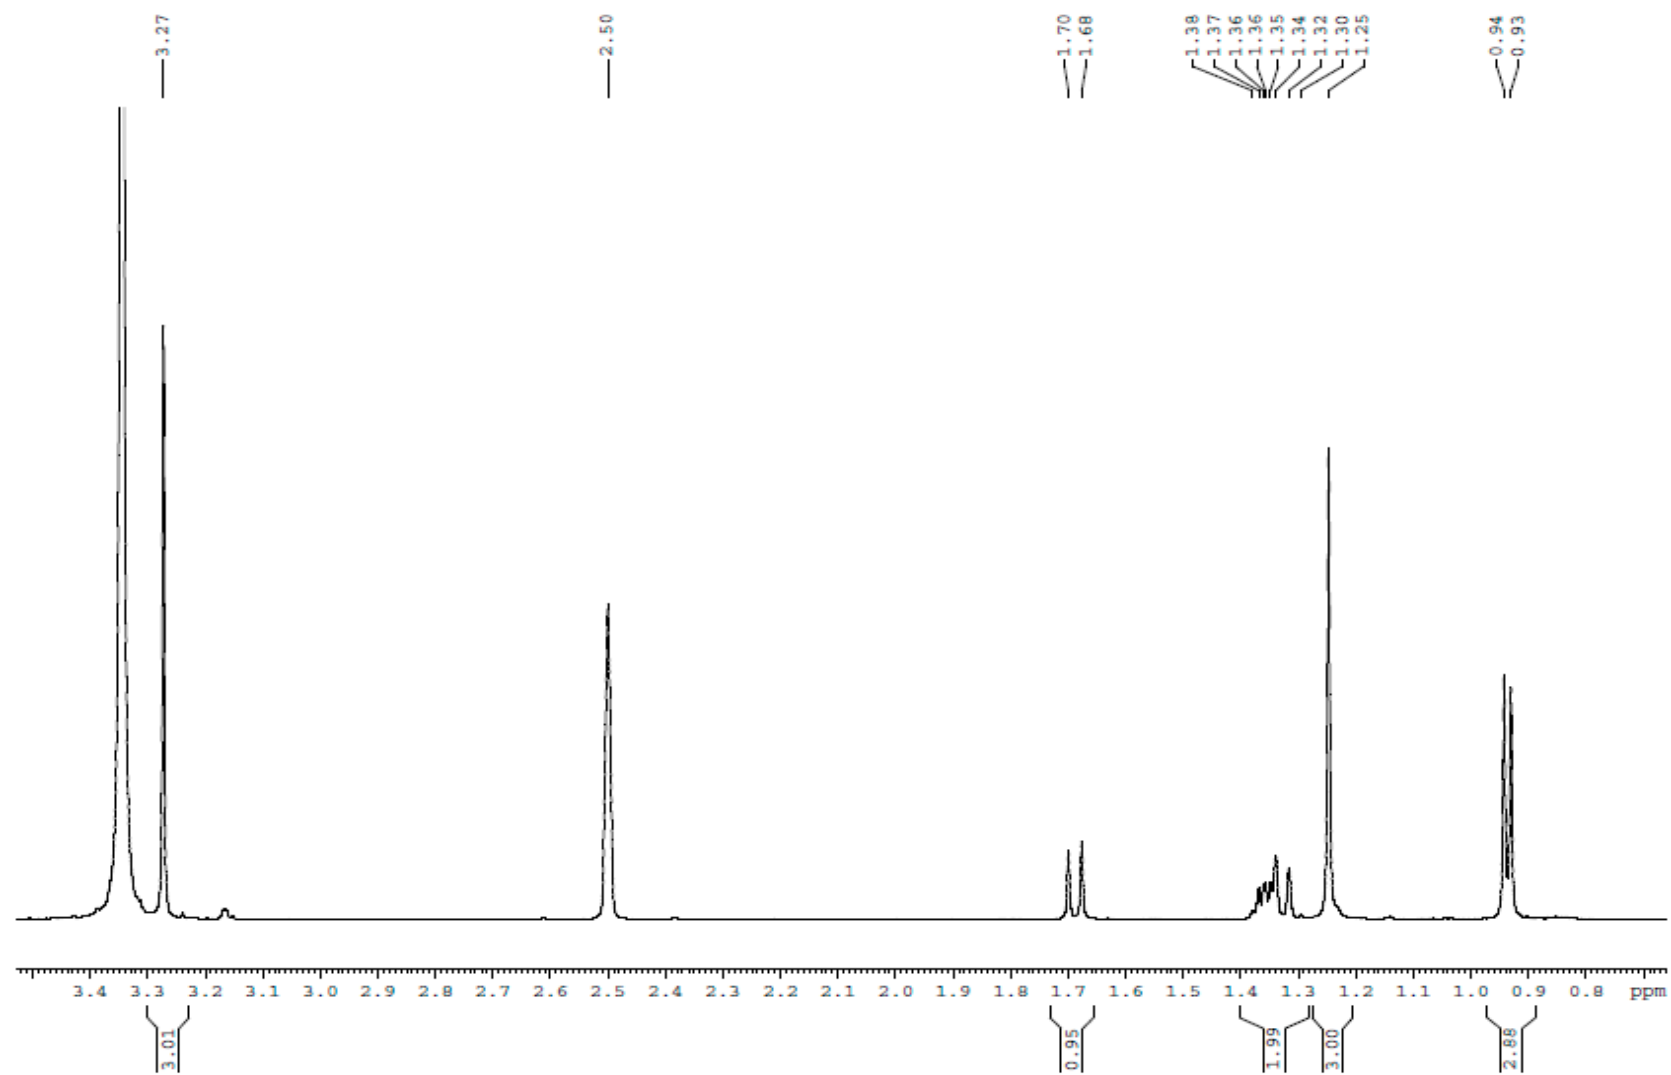

Figure S9. Cont.

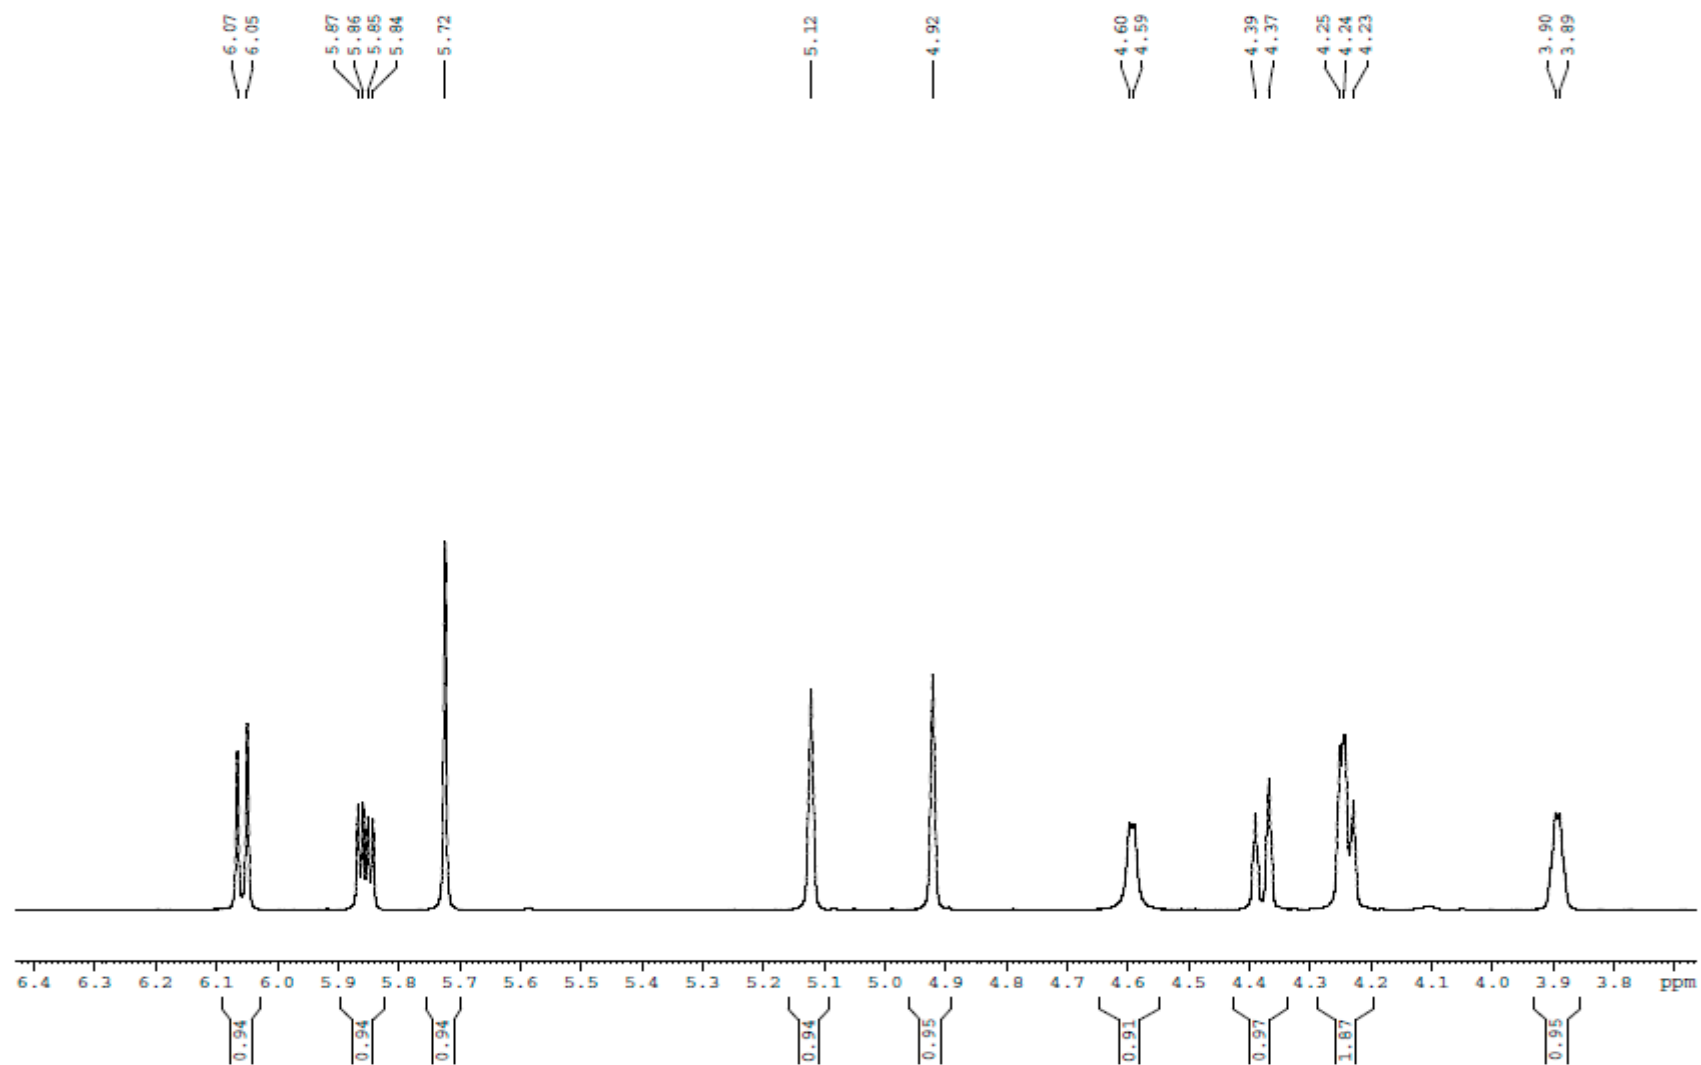

Figure S9. <sup>1</sup>H-NMR spectrum of 2 in DMSO-*d*<sub>6</sub>.

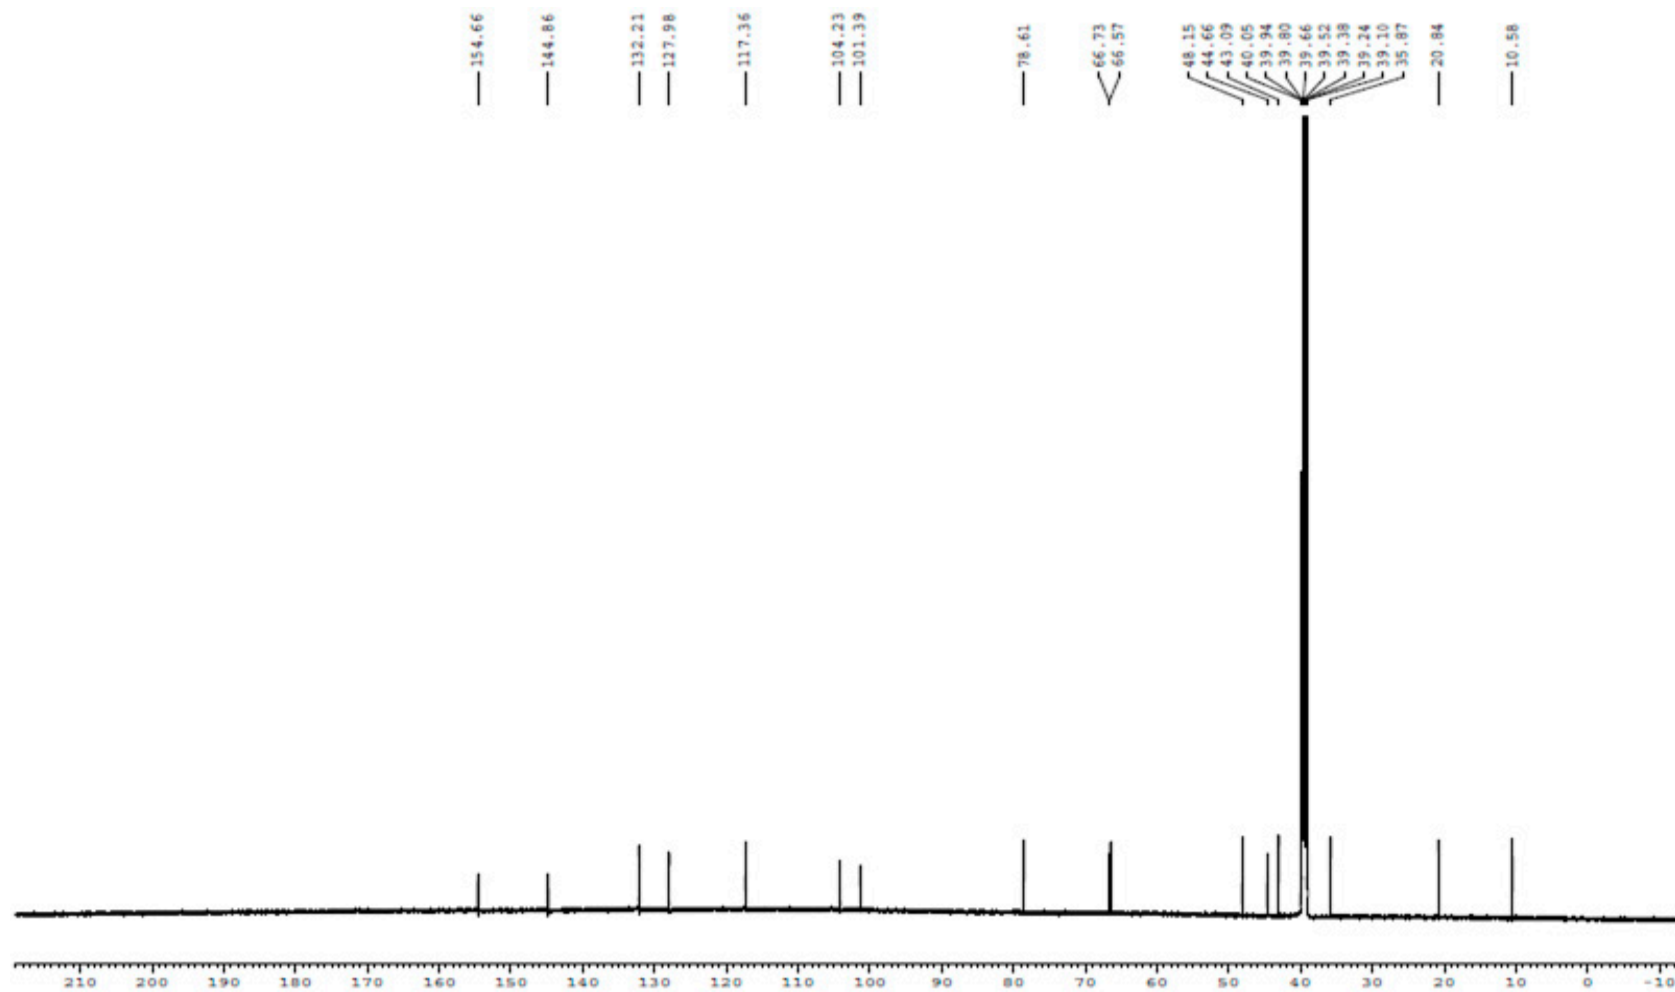

Figure S10. Cont.

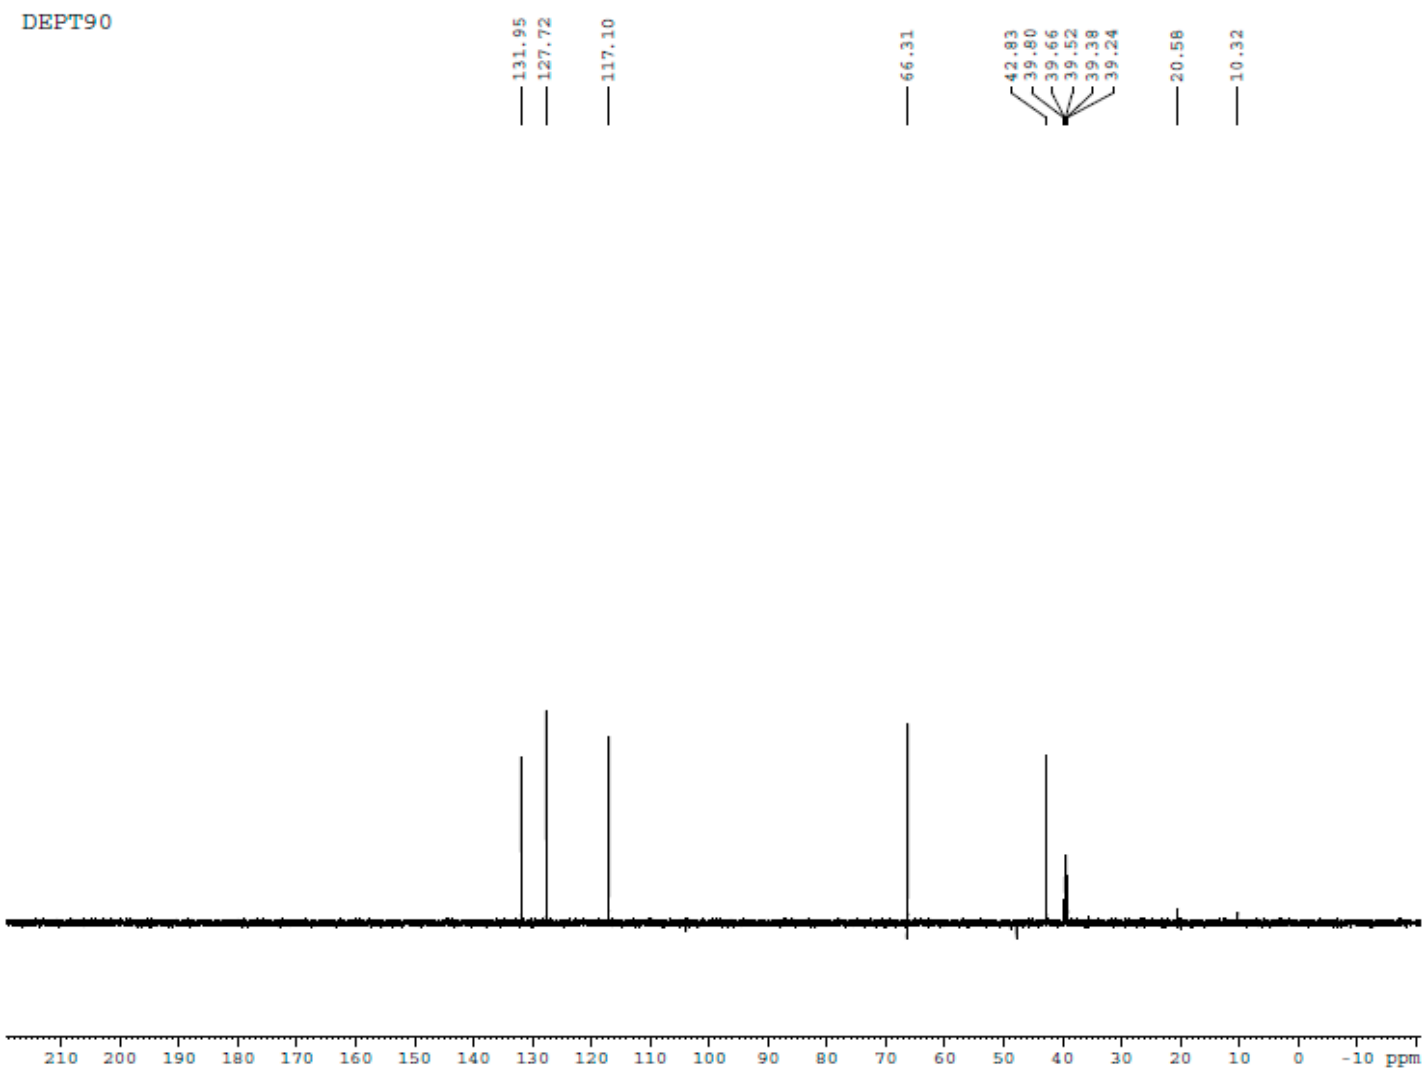

Figure S10. Cont.

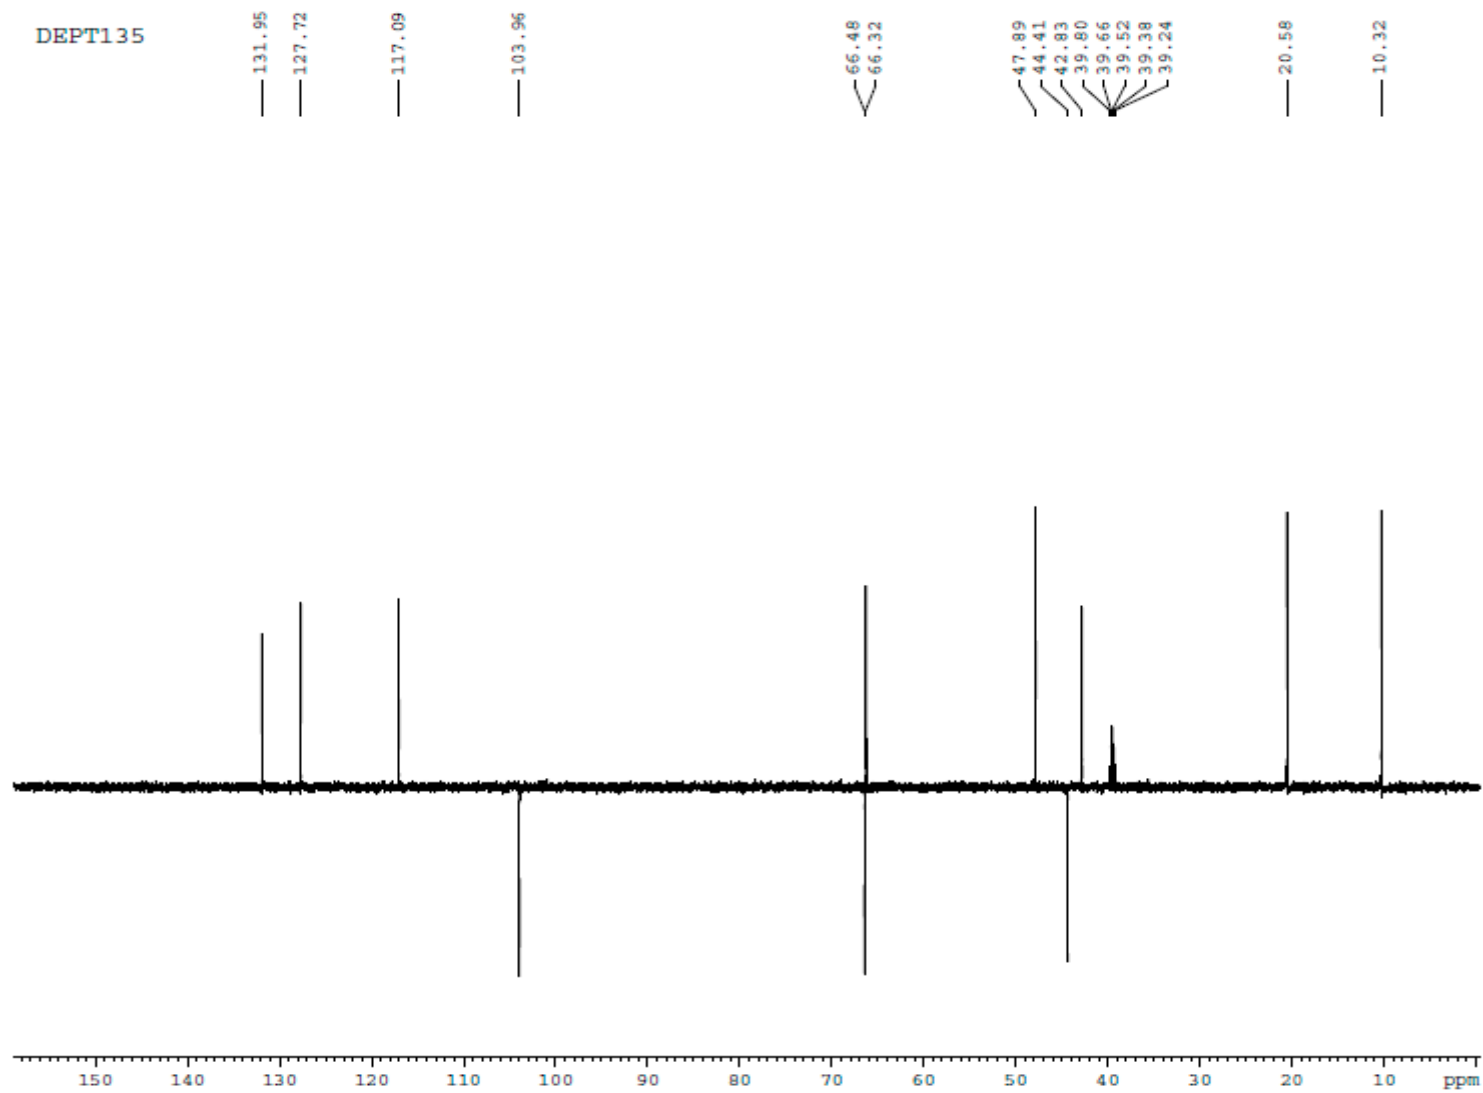

Figure S10.  $^{13}\text{C}$ -NMR spectrum and DEPT of **2** in  $\text{DMSO-}d_6$ .

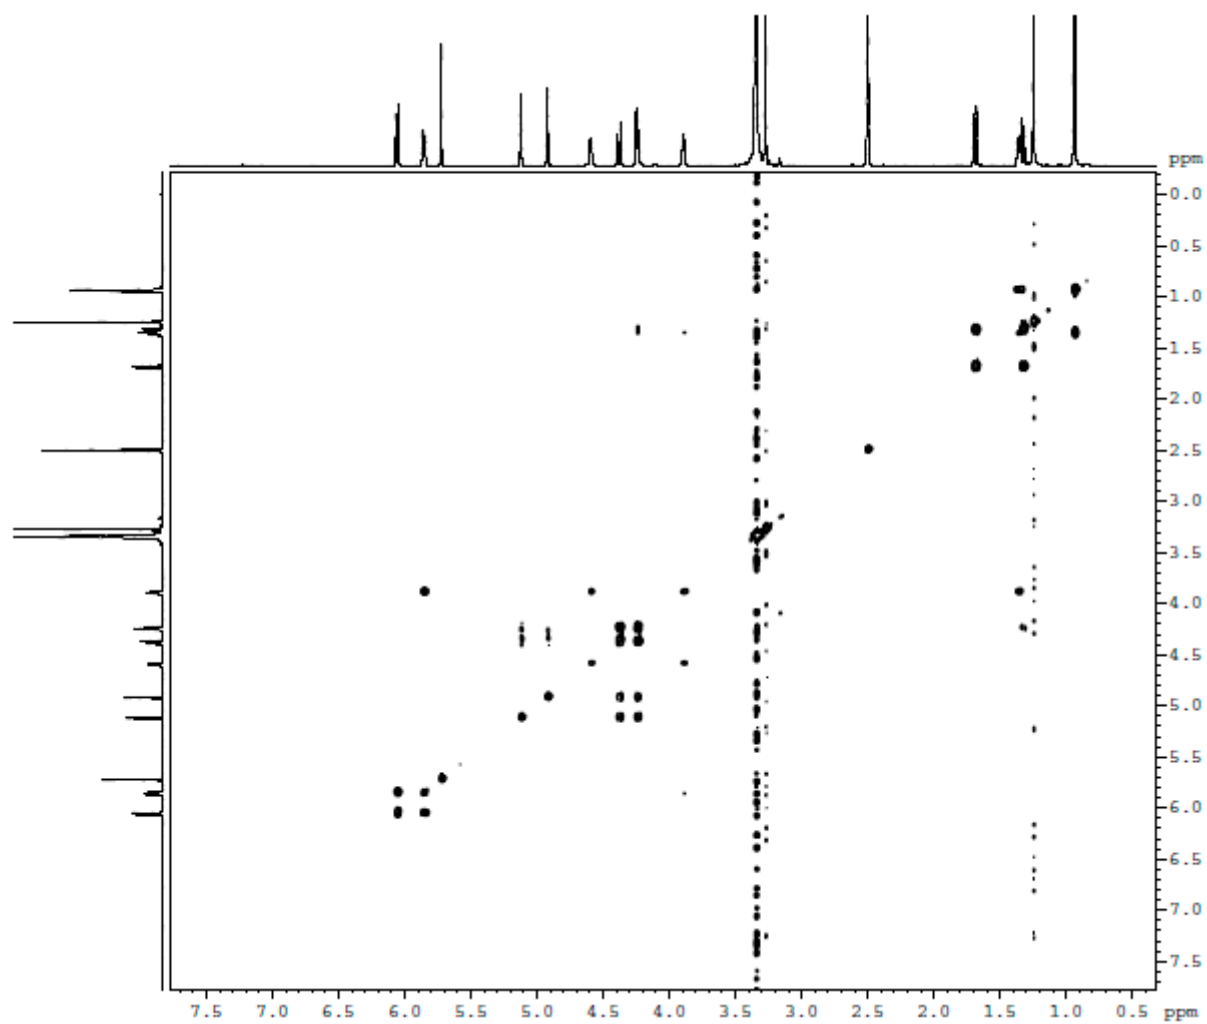

Figure S11.  $^1\text{H}$ - $^1\text{H}$  COSY spectrum of 2 in  $\text{DMSO-}d_6$ .

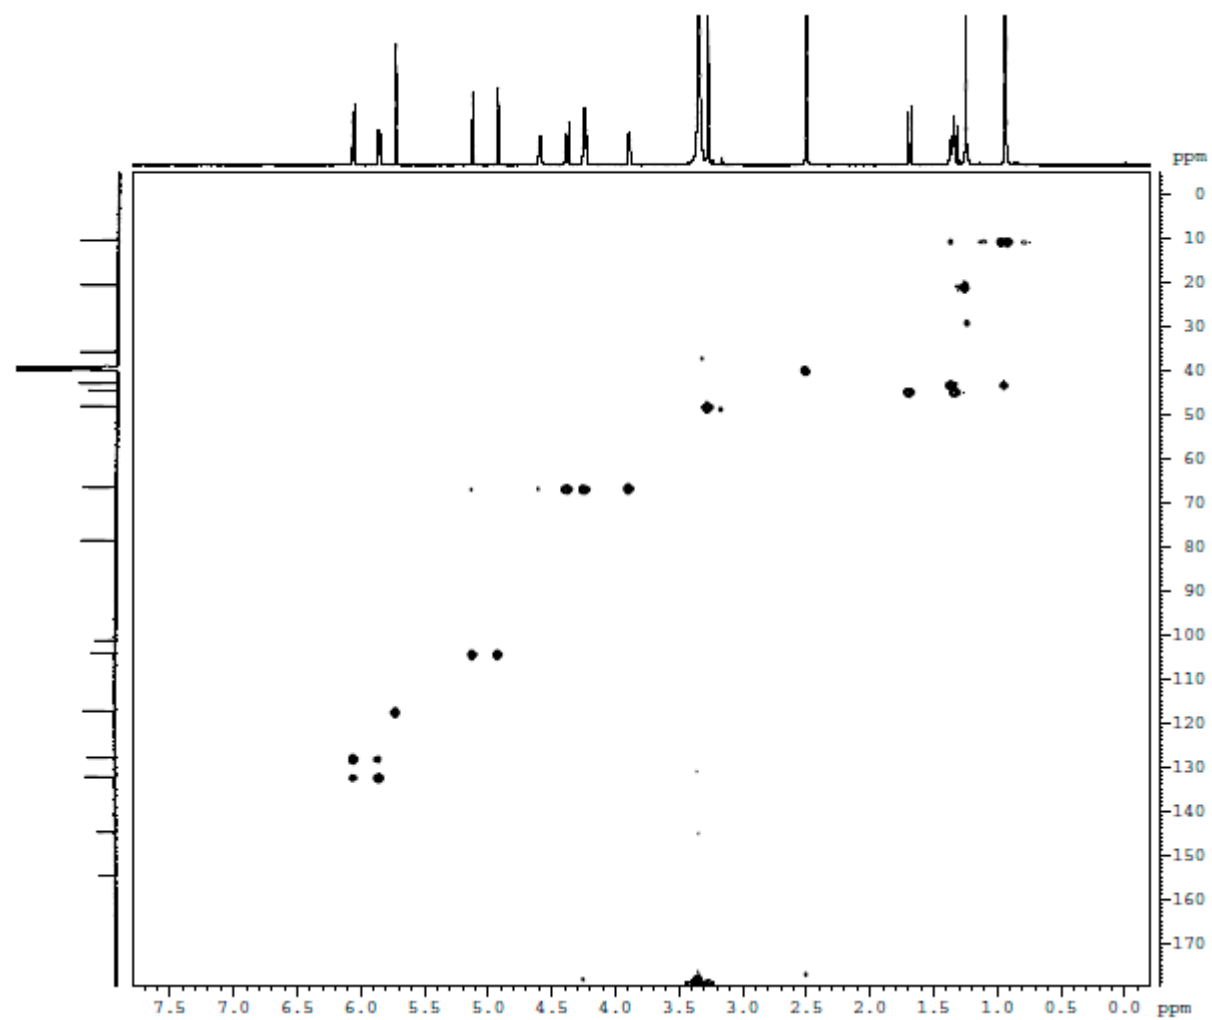

Figure S12. HSQC spectrum of 2 in DMSO-*d*<sub>6</sub>.

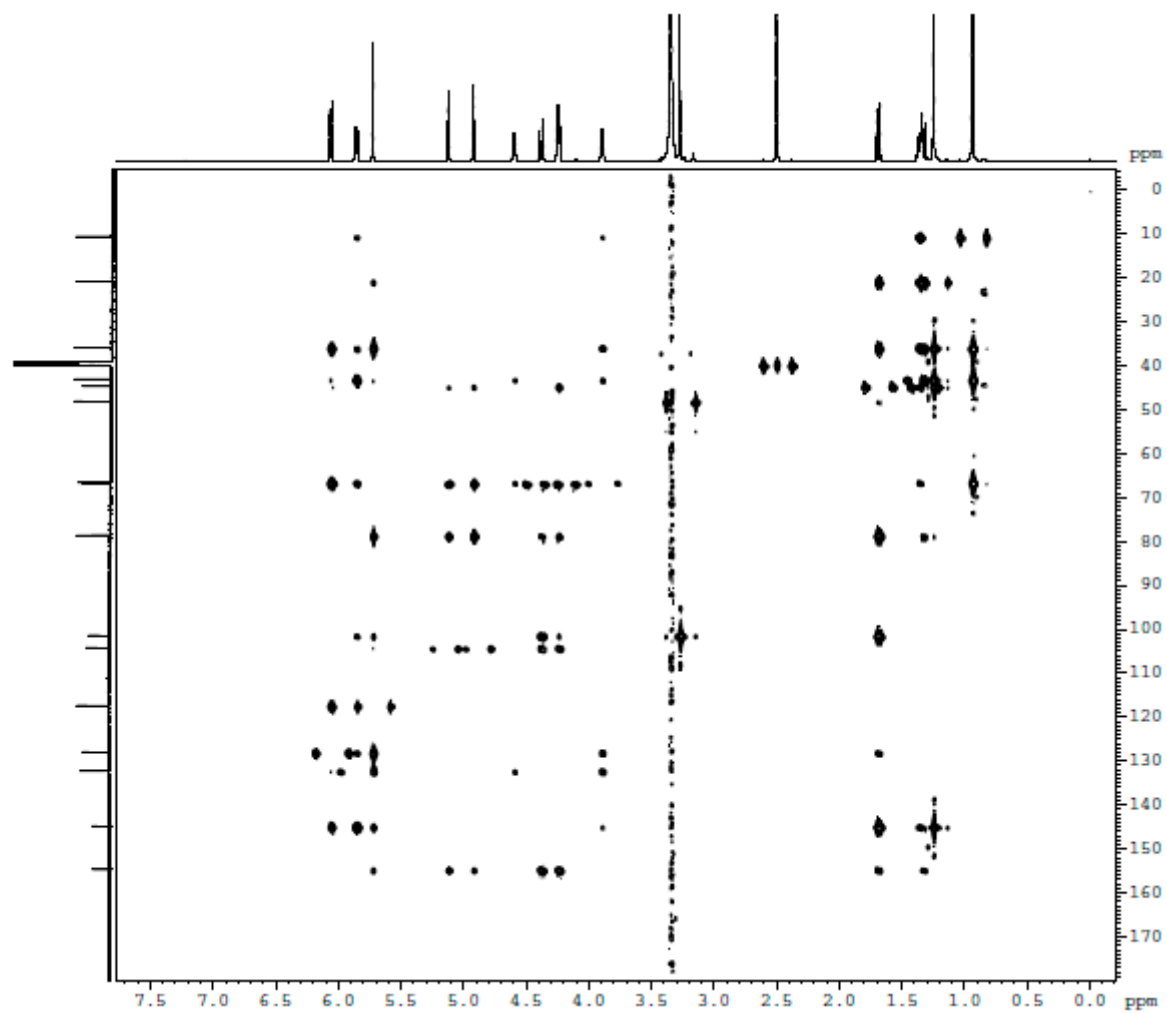Figure S13. HMBC spectrum of 2 in DMSO- $d_6$ .



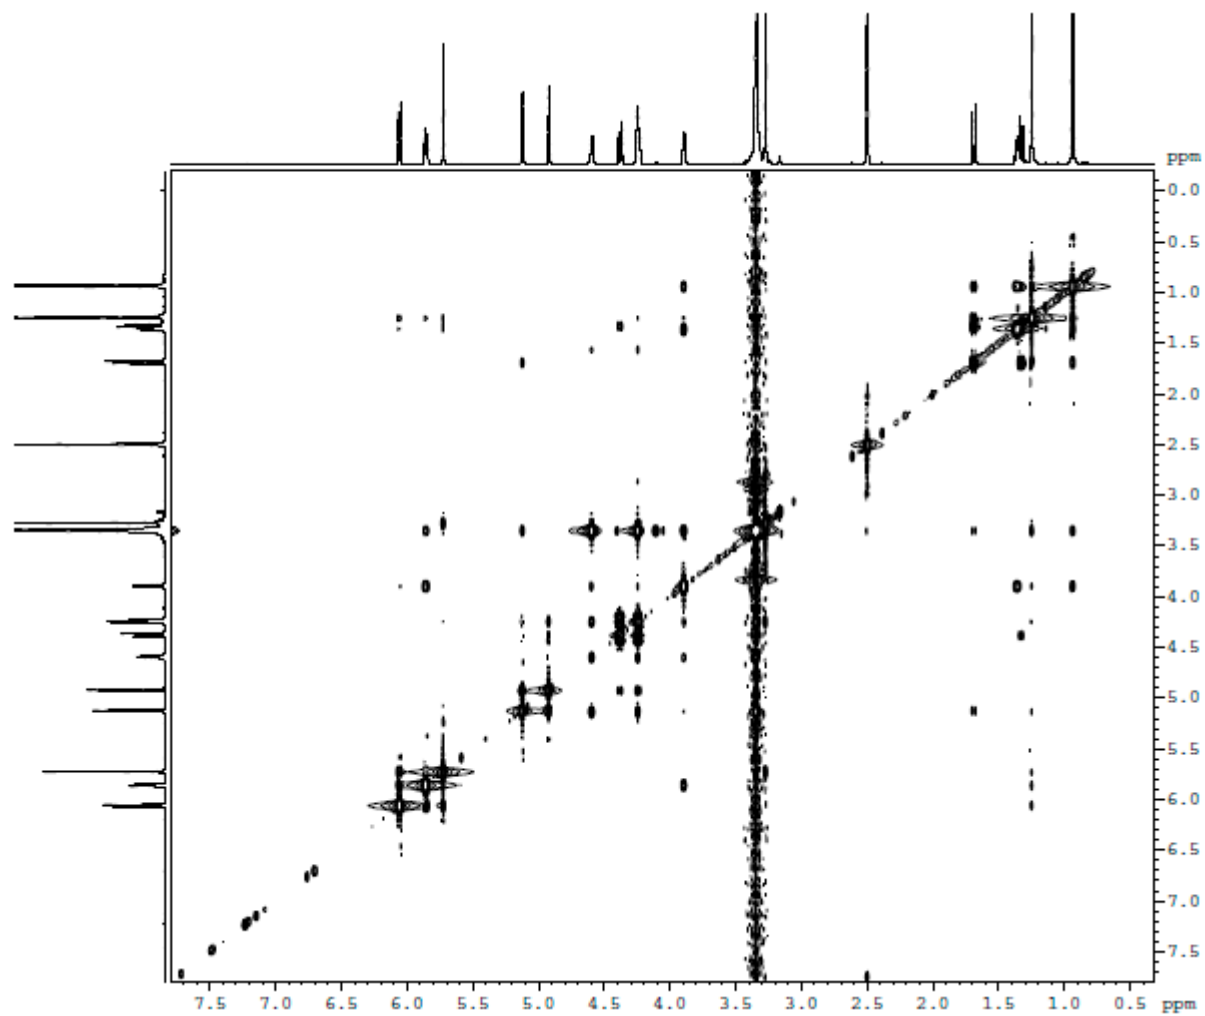

Figure S14. NOESY spectrum of 2 in DMSO-*d*<sub>6</sub>.

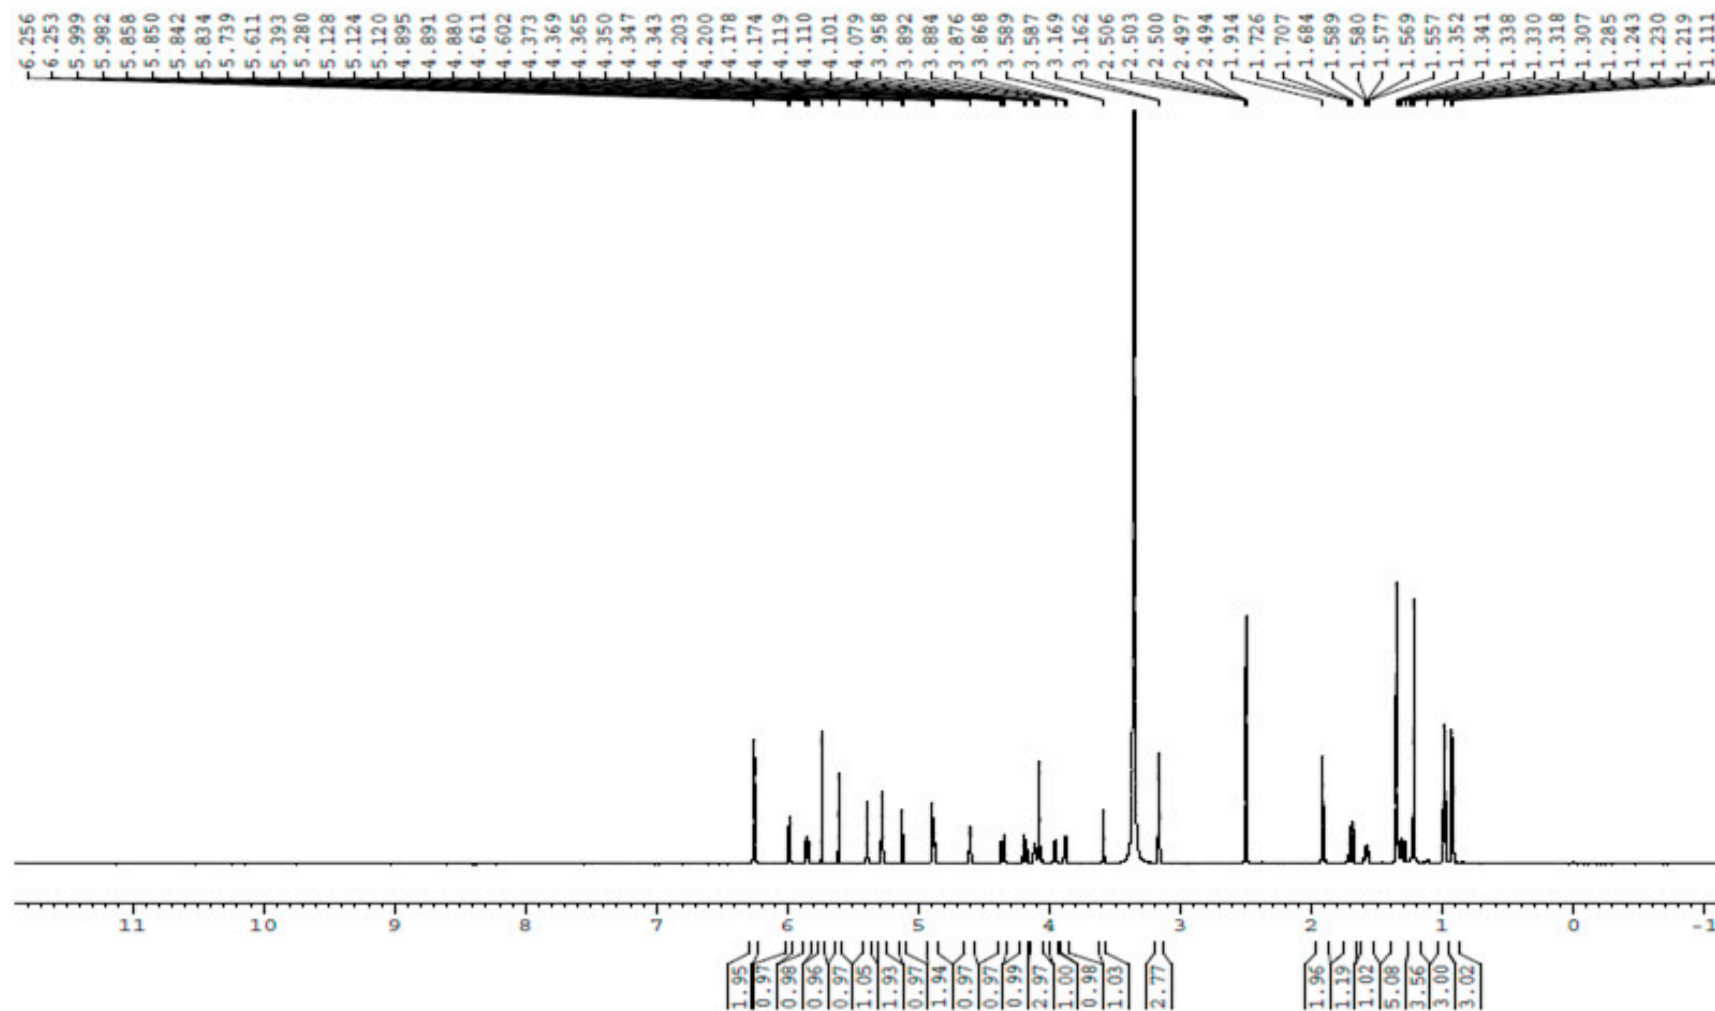

Figure S15. Cont.

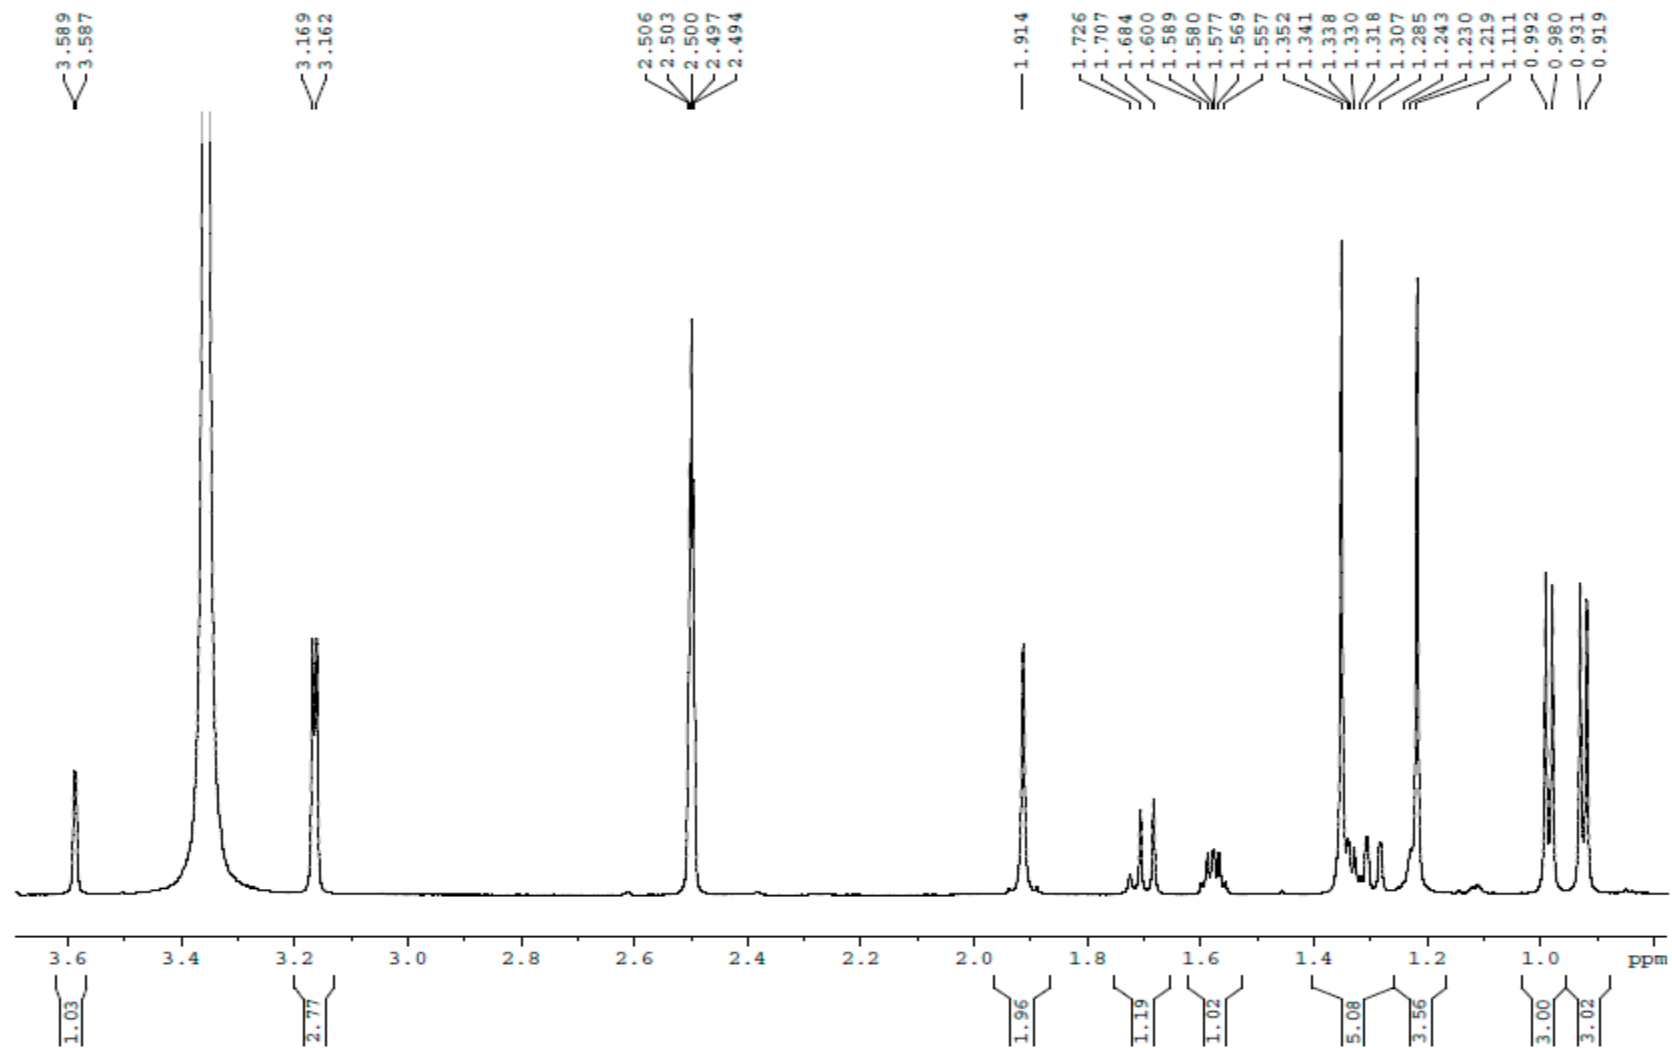

Figure S15. Cont.

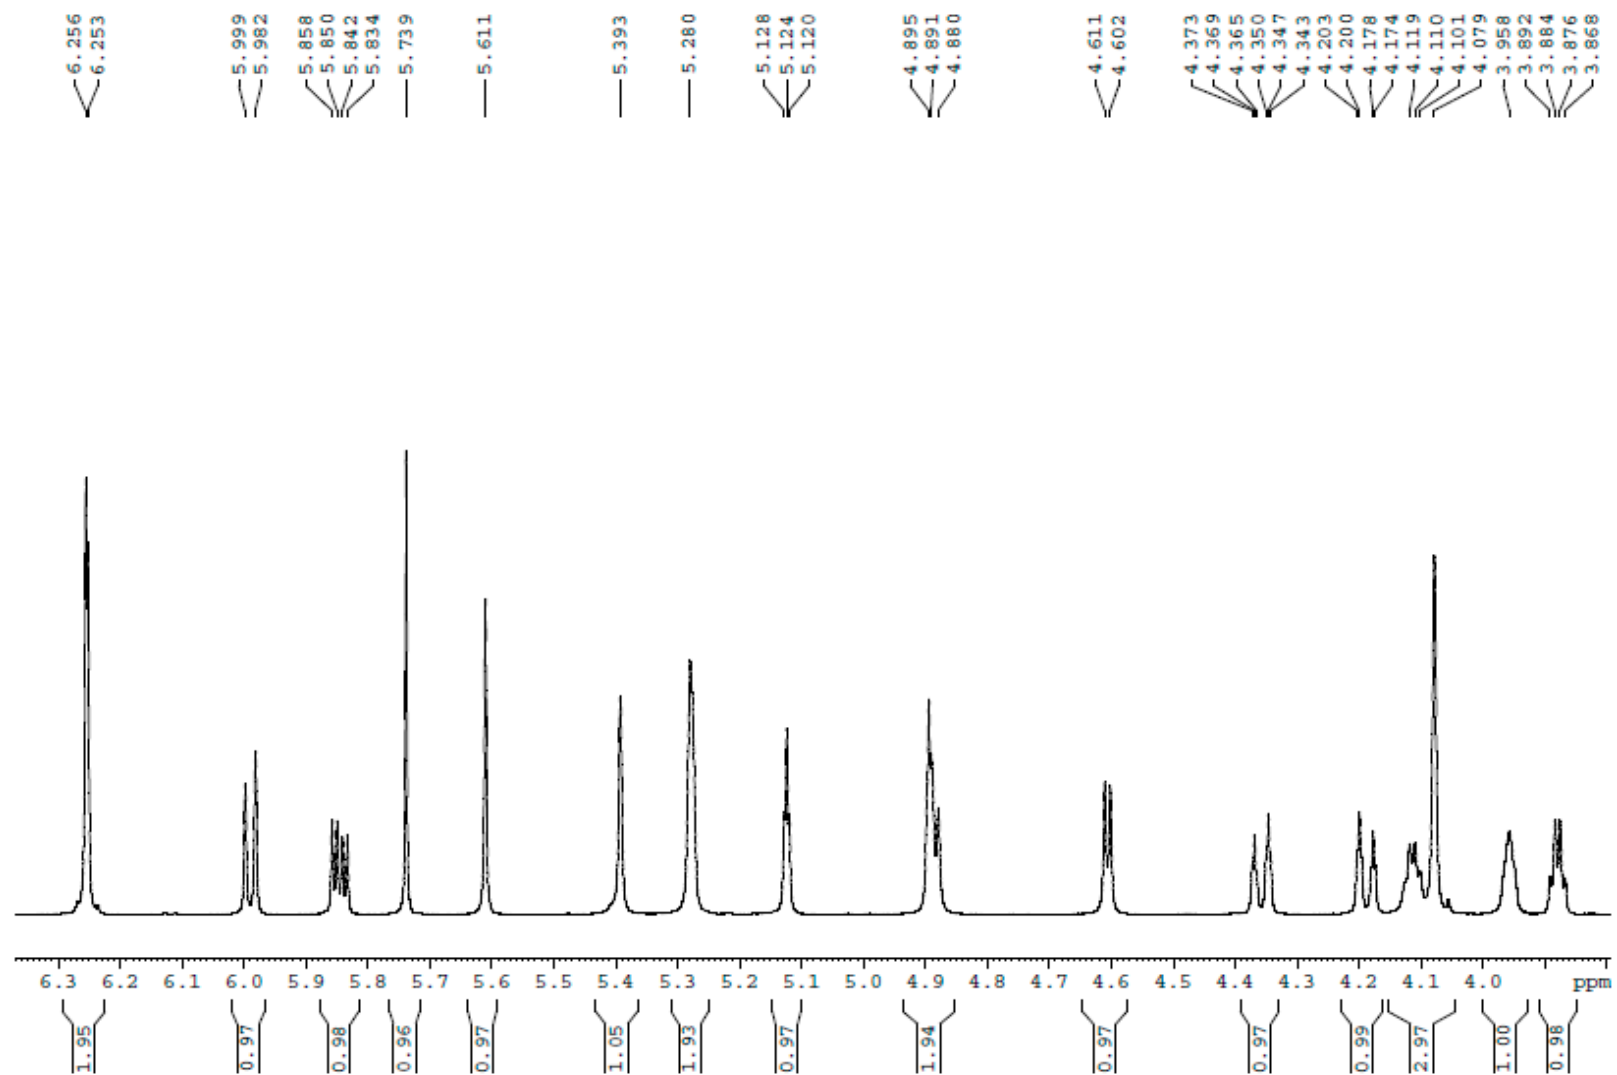Figure S15. <sup>1</sup>H-NMR spectrum of 3 in DMSO-d<sub>6</sub>.

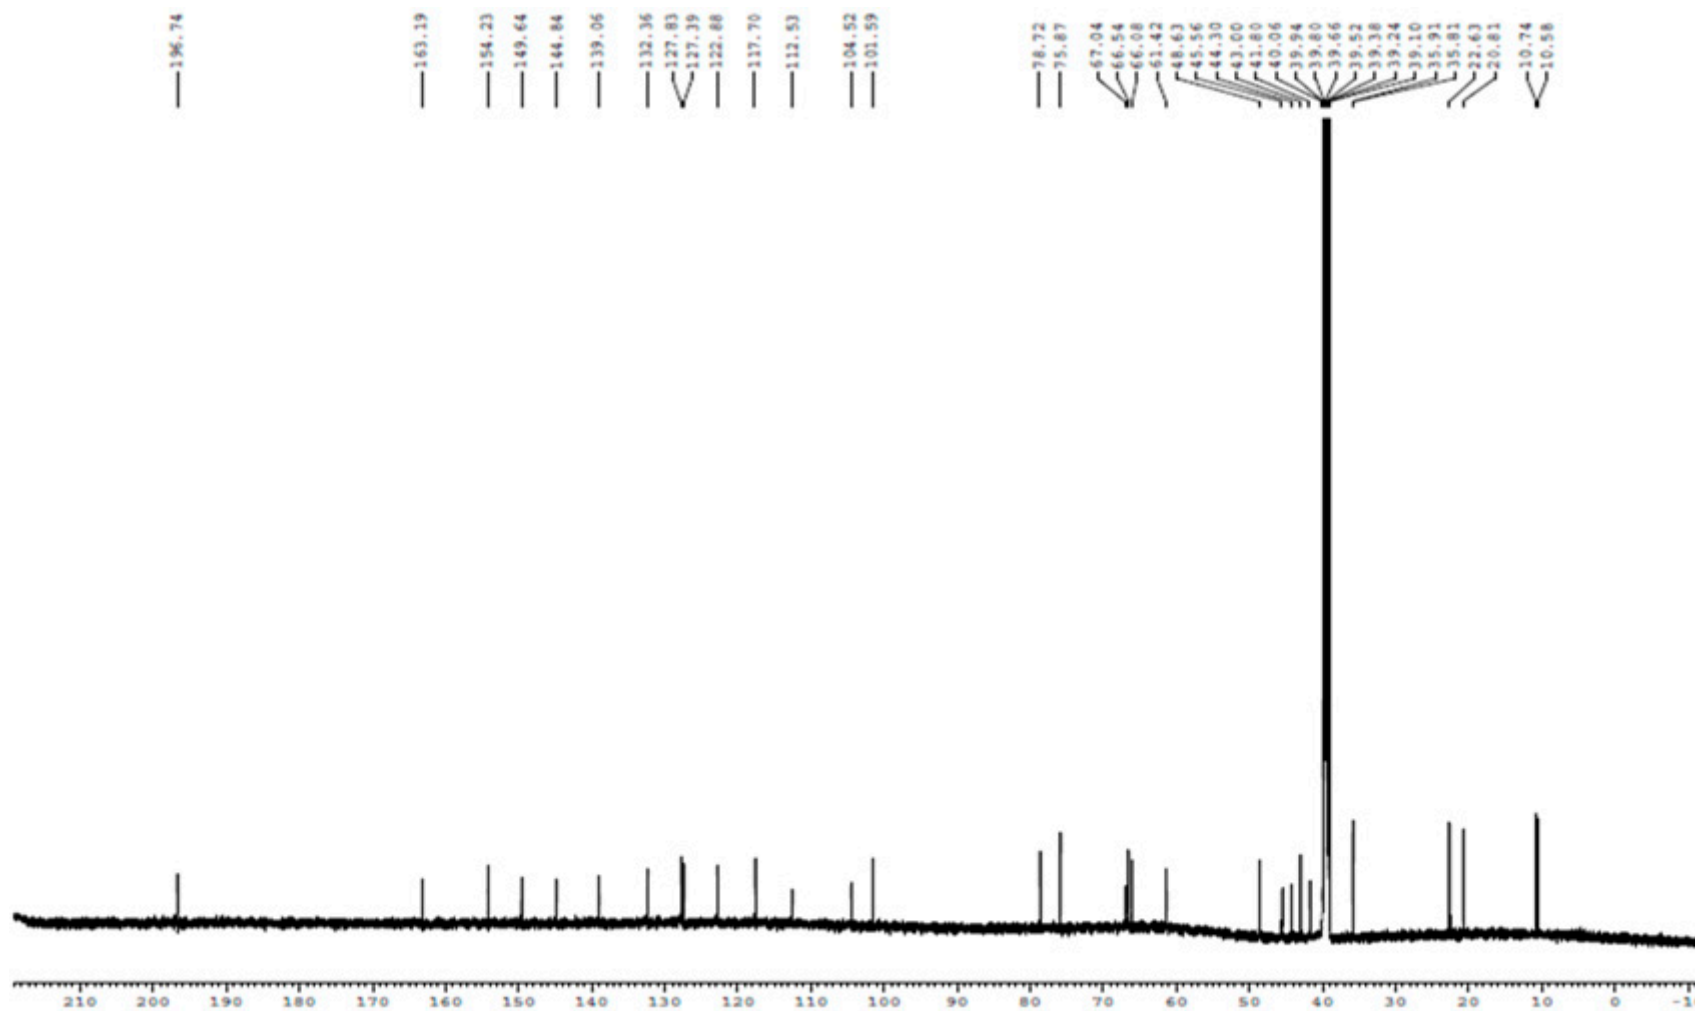

Figure S16. Cont.

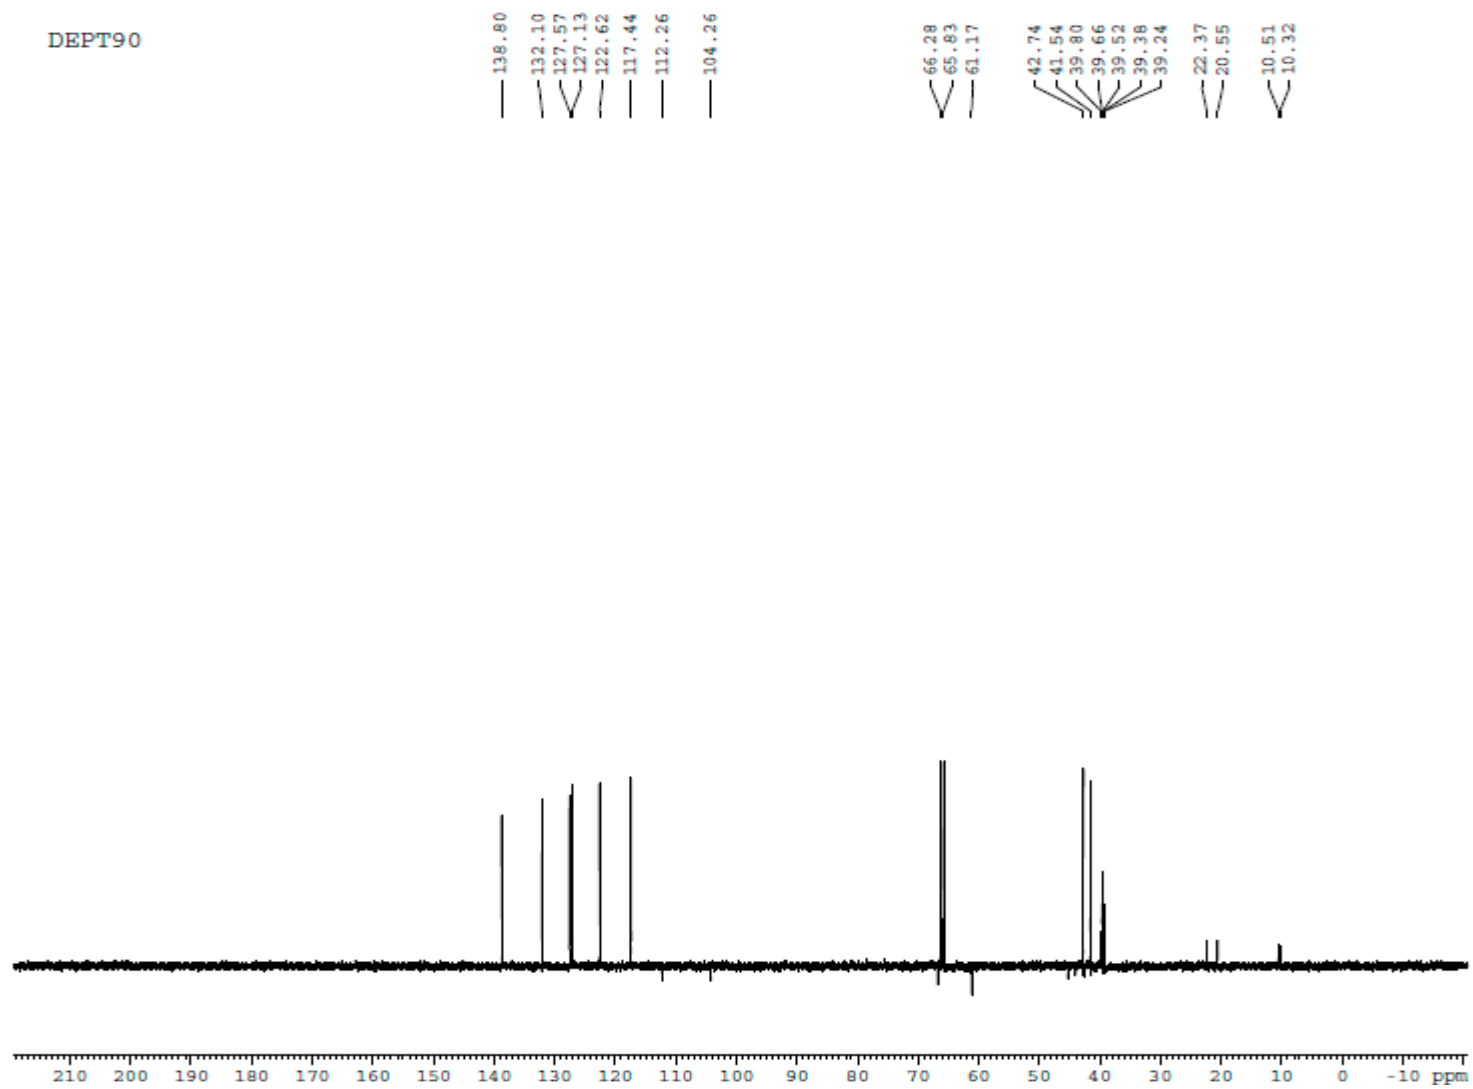

Figure S16. Cont.

DEPT135

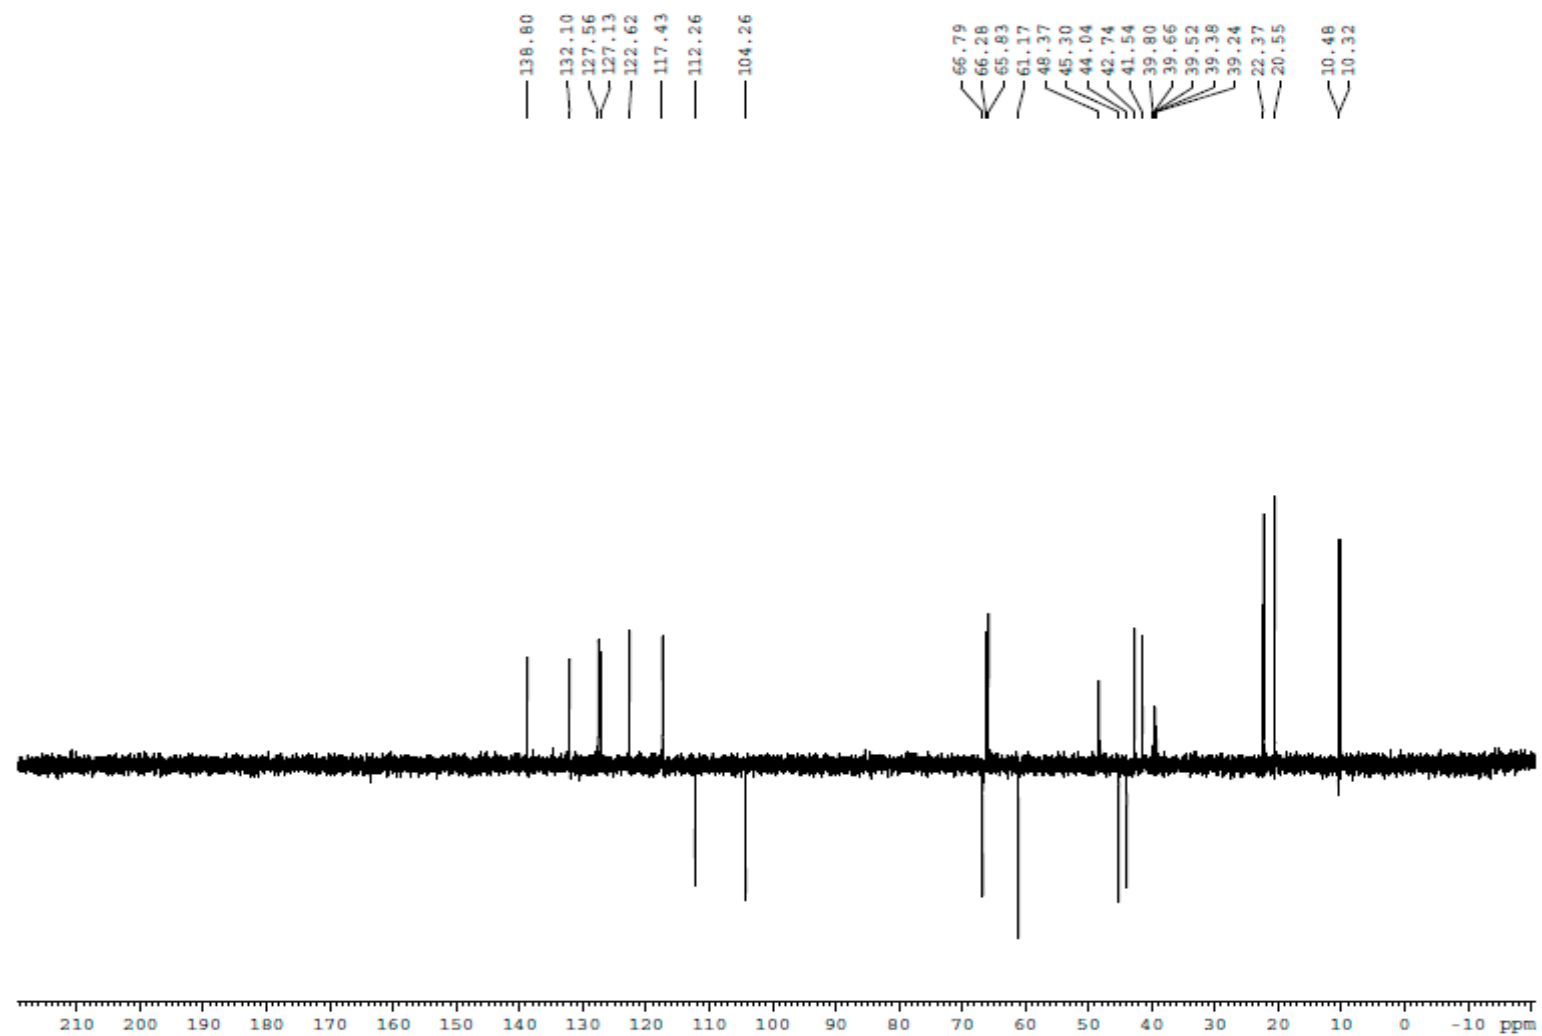Figure S16.  $^{13}\text{C}$ -NMR spectrum and DEPT of 3 in  $\text{DMSO-}d_6$ .

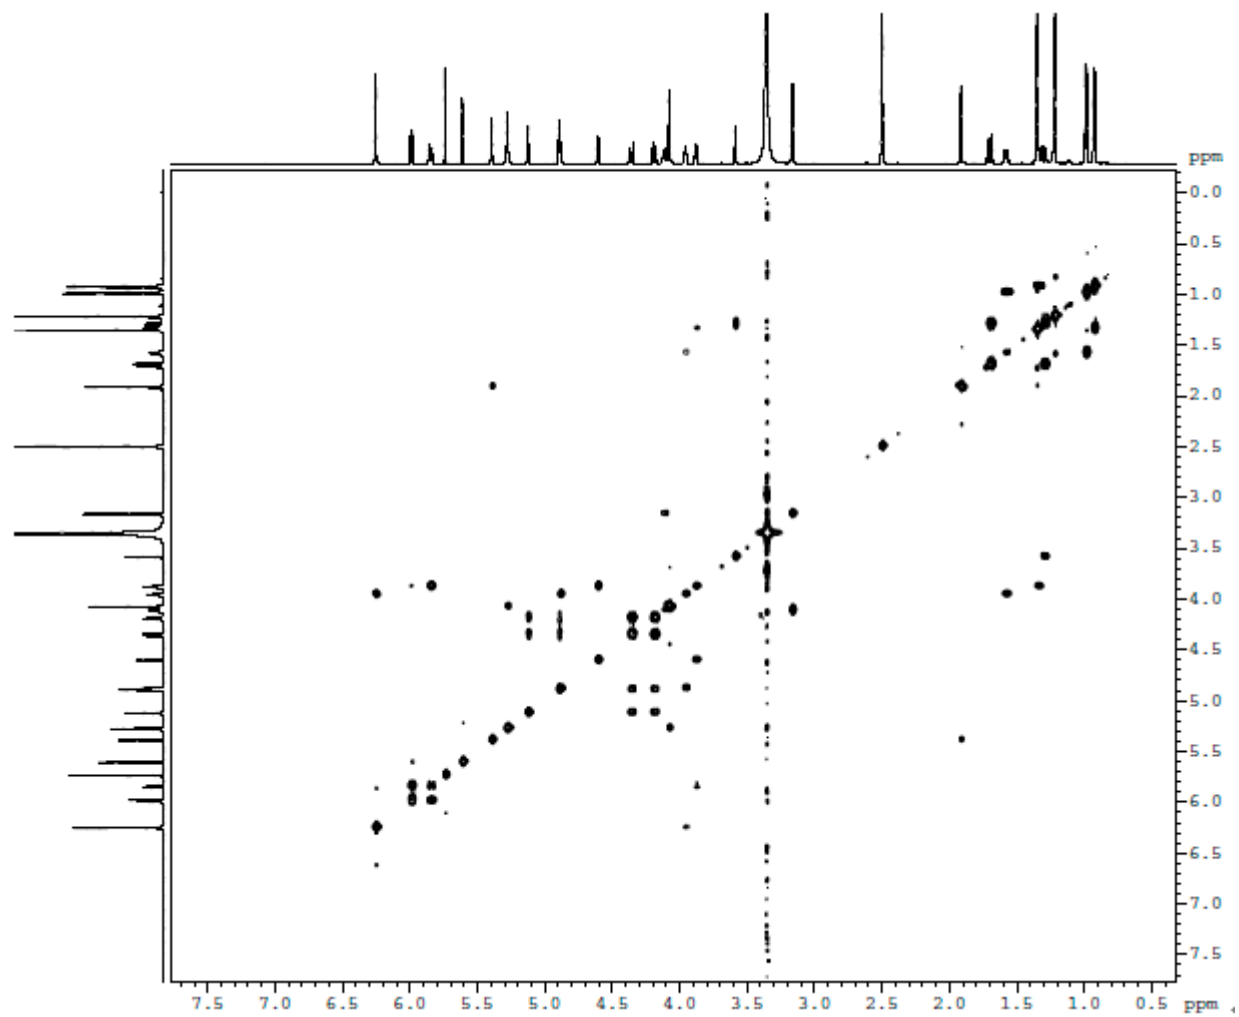

Figure S17.  $^1\text{H}$ - $^1\text{H}$  COSY spectrum of 3 in  $\text{DMSO-}d_6$ .



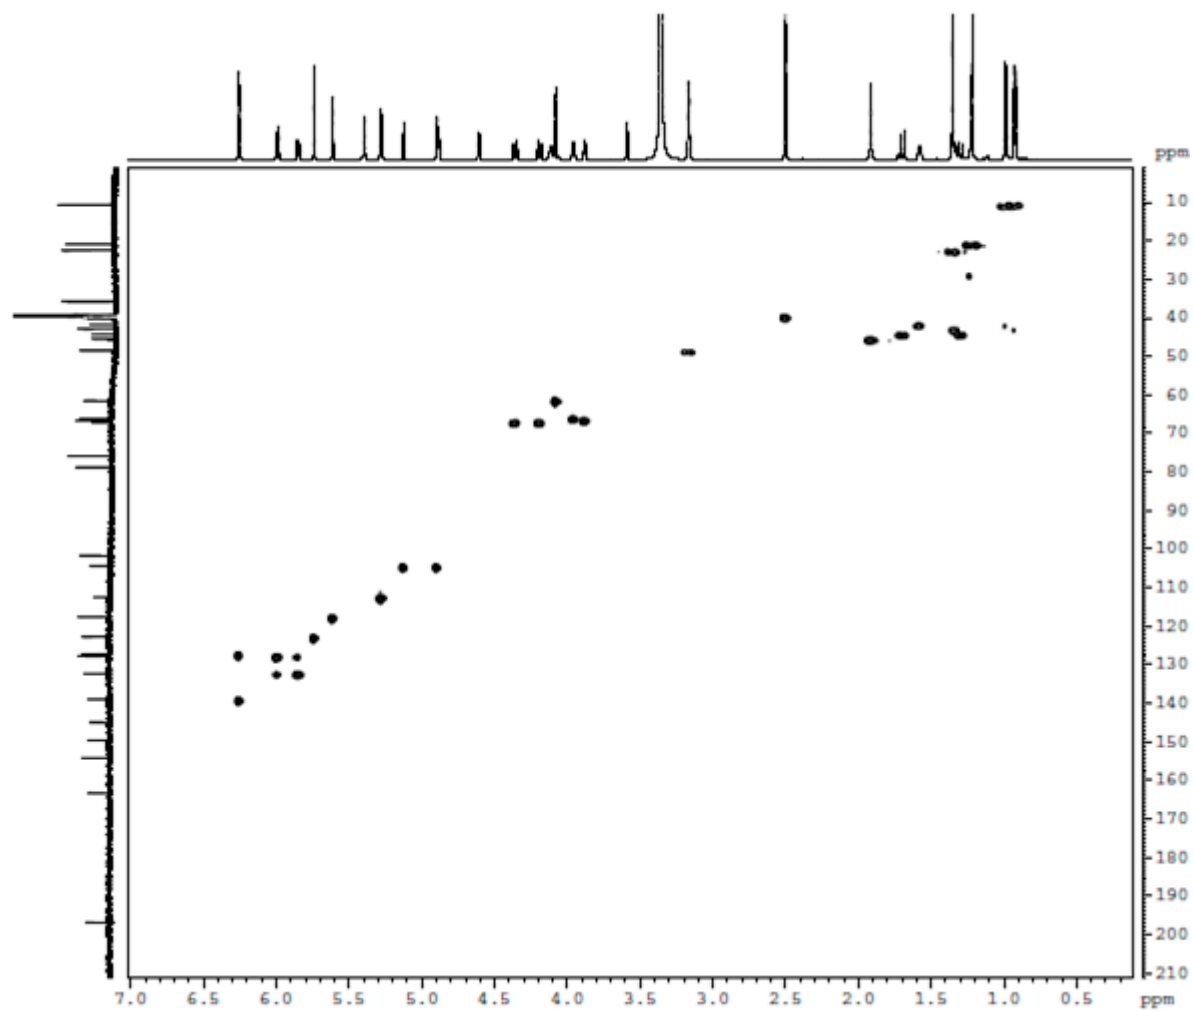

Figure S18. HSQC spectrum of 3 in DMSO-*d*<sub>6</sub>.

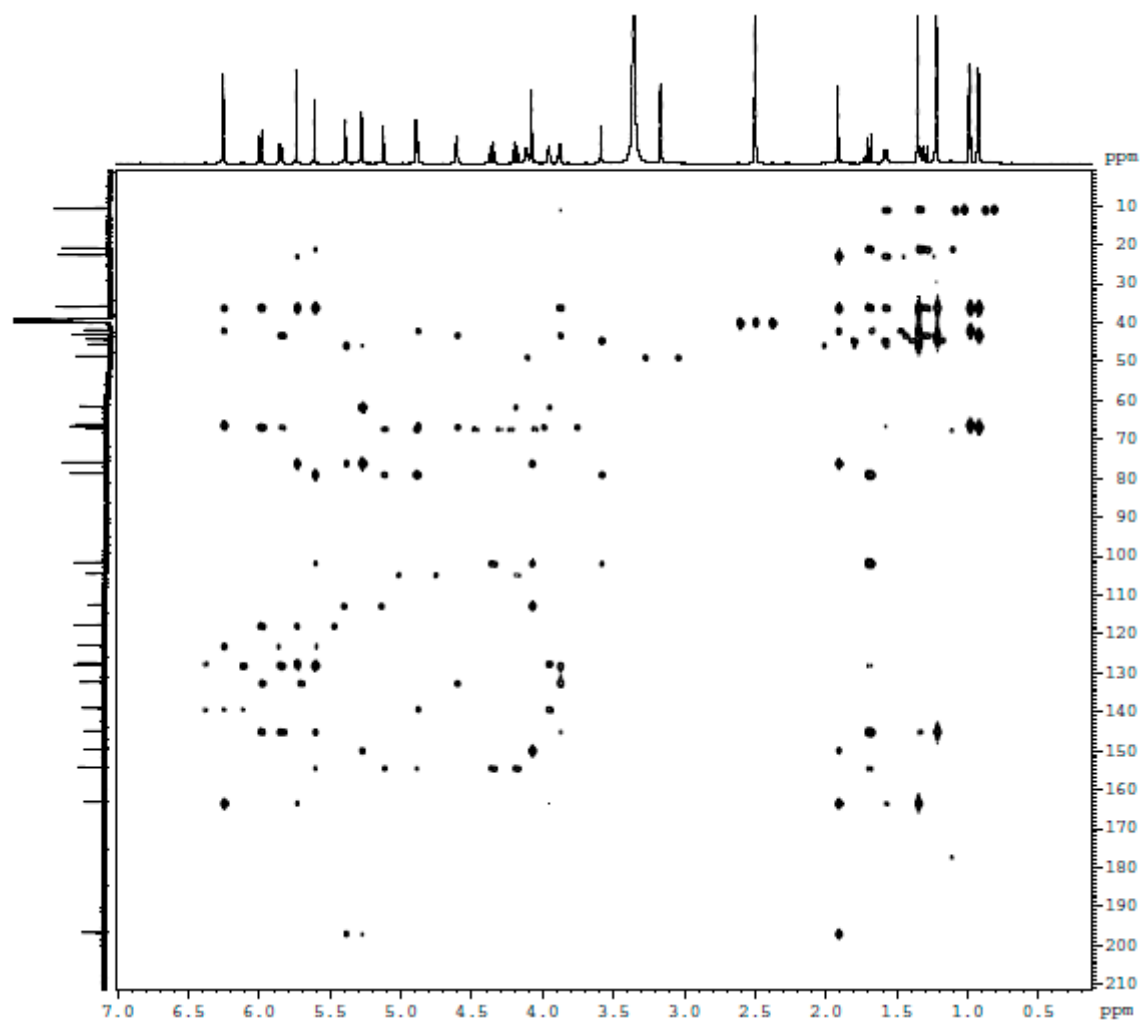Figure S19. HMBC spectrum of 3 in DMSO-*d*<sub>6</sub>.

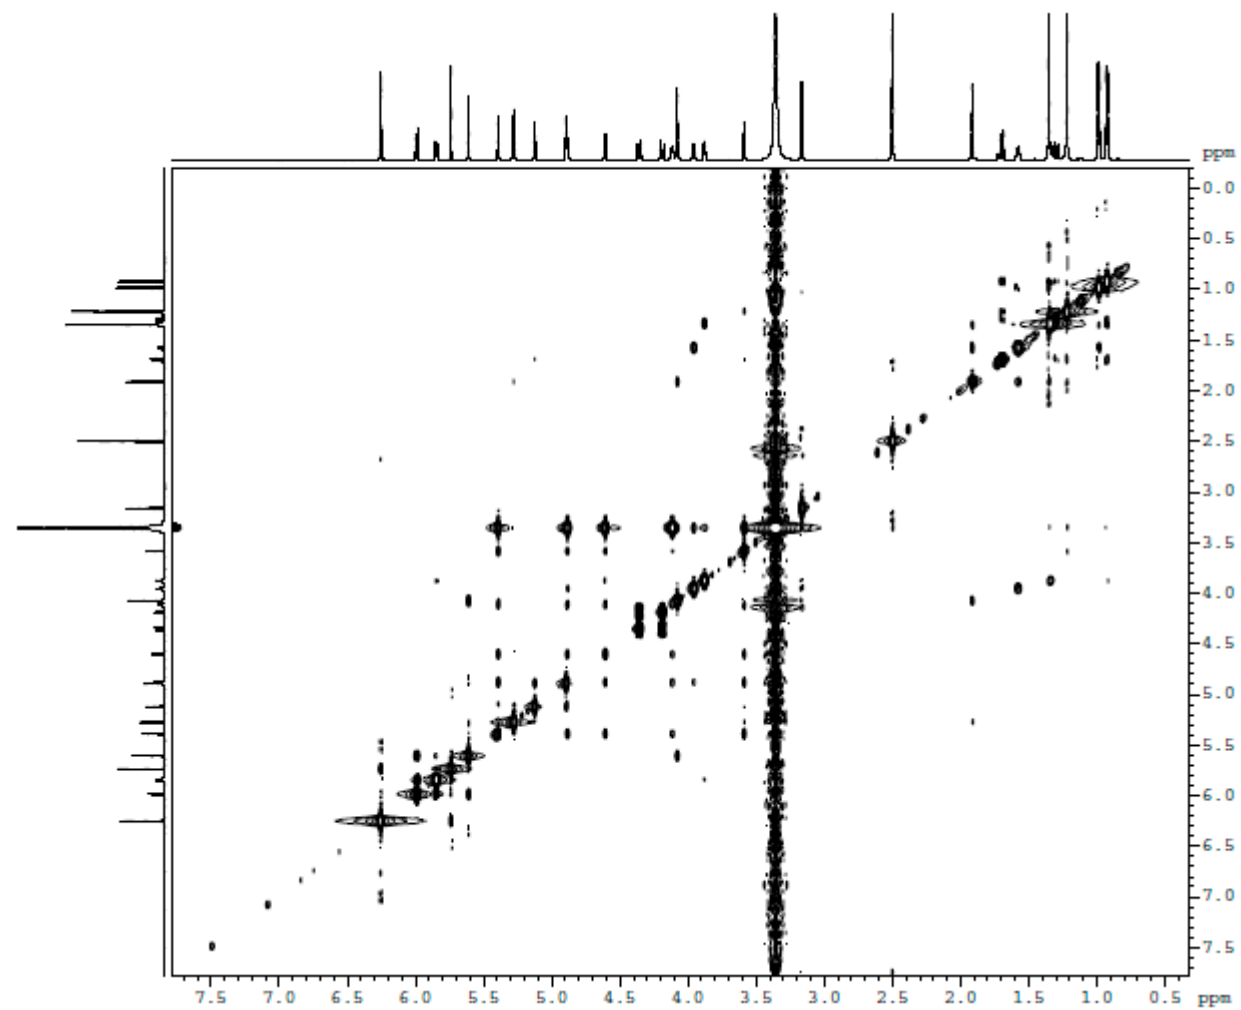

Figure S20. NOESY spectrum of 3 in DMSO-*d*<sub>6</sub>.

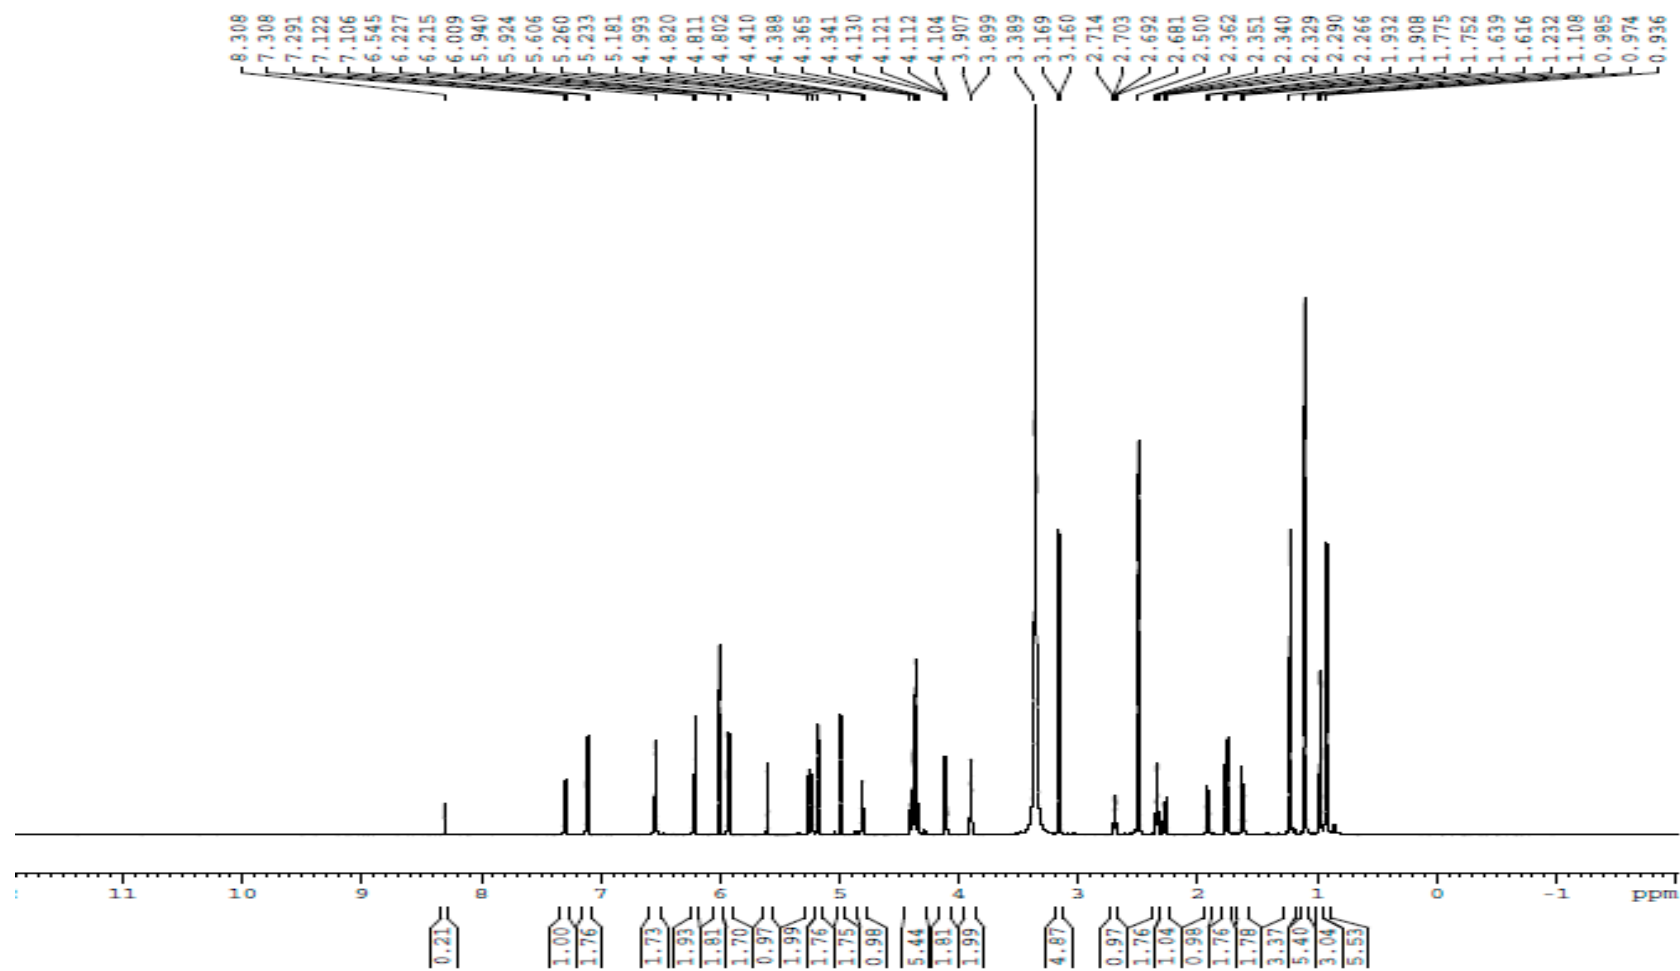

Figure S21. Cont.

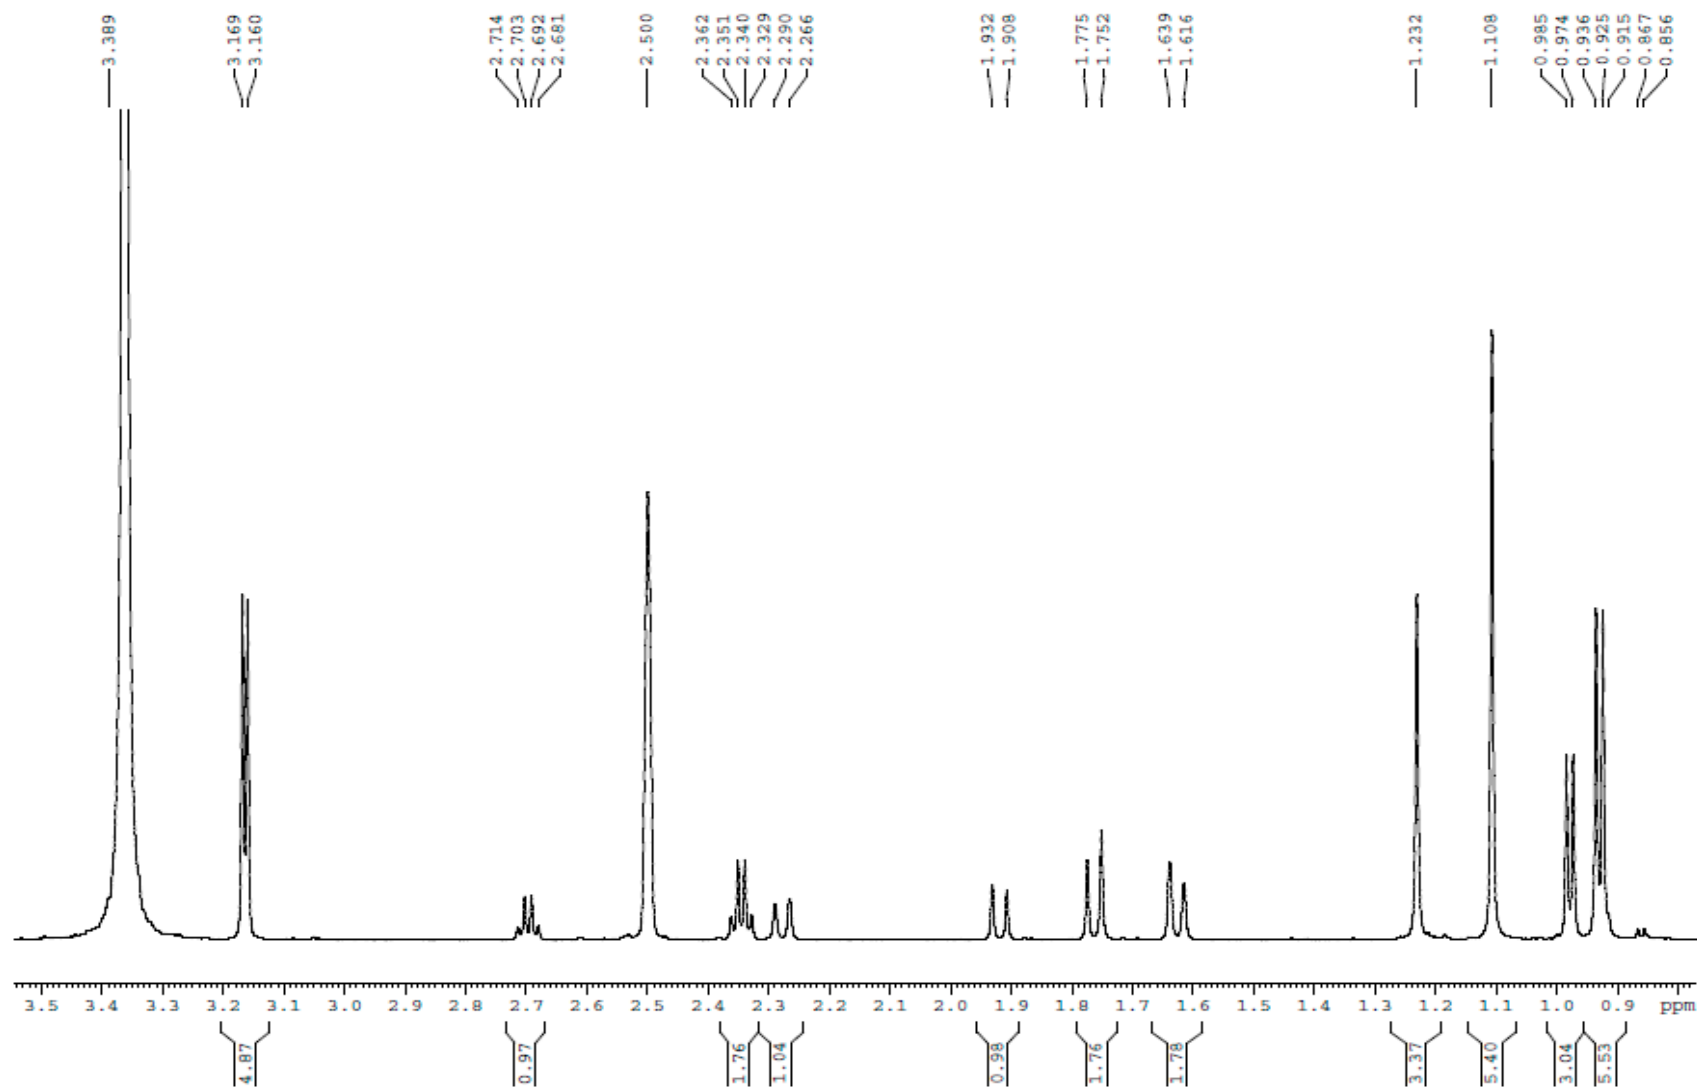

Figure S21. Cont.

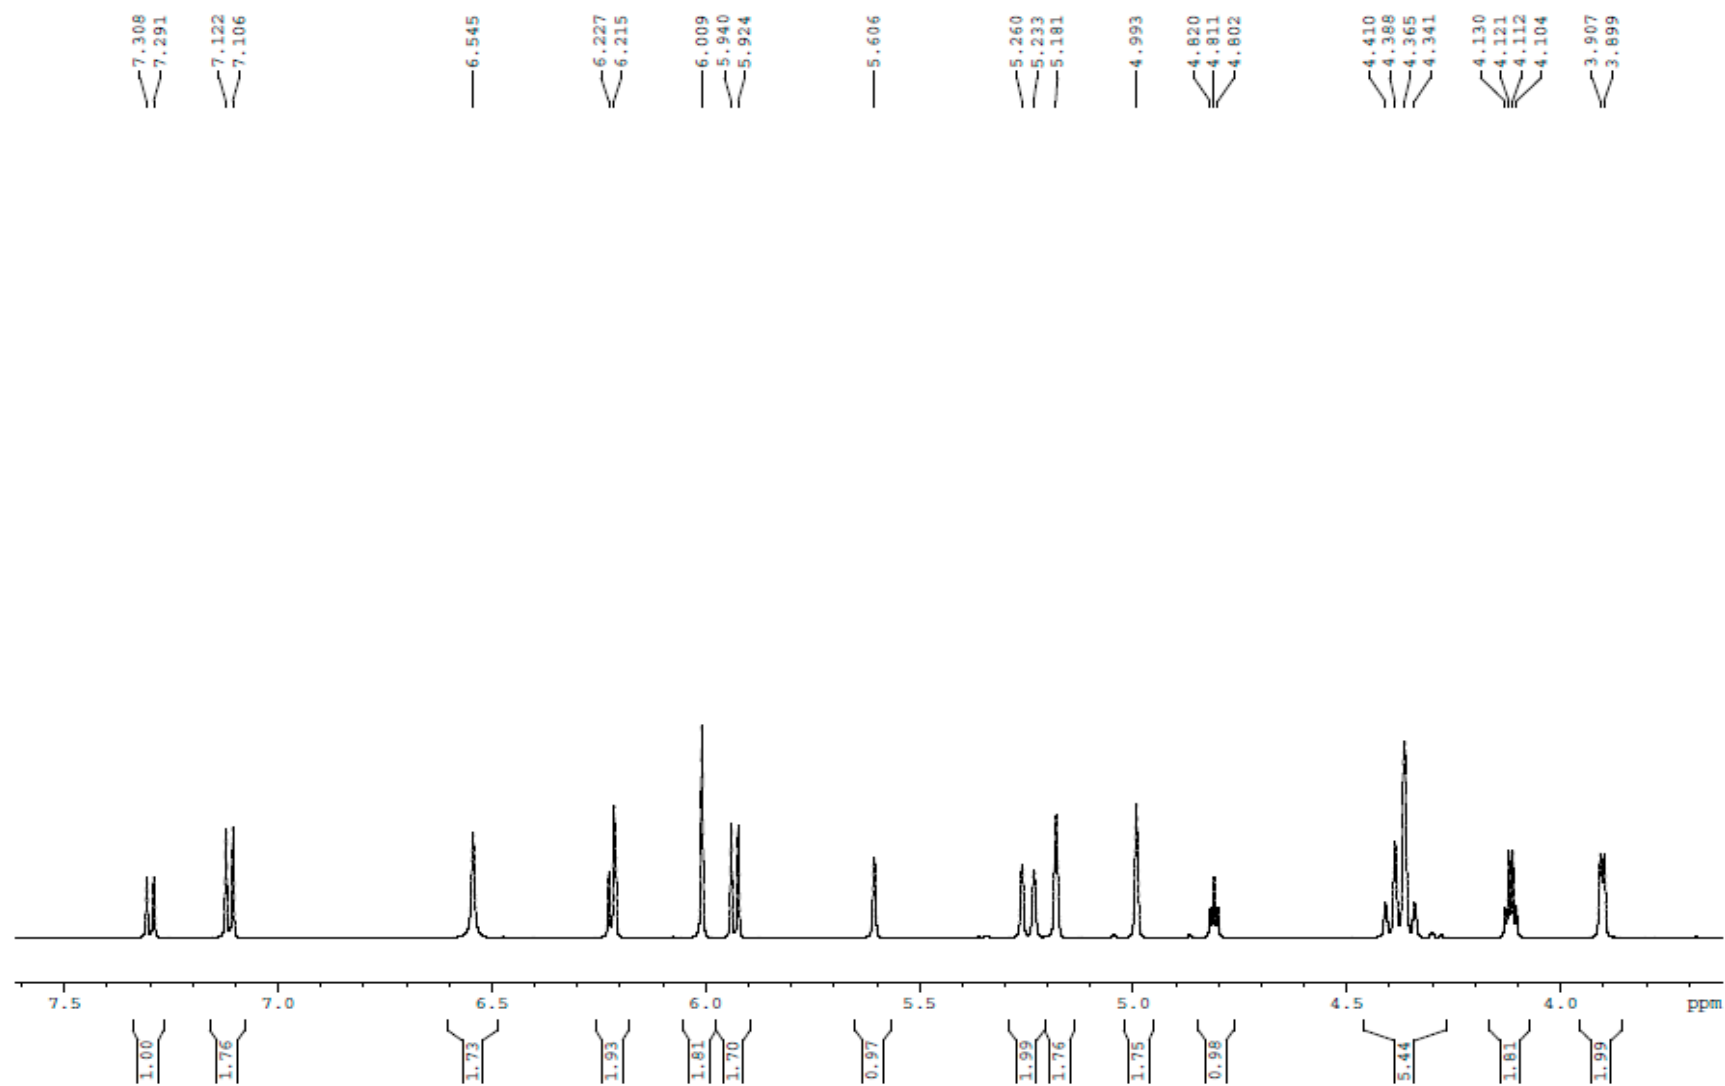Figure S21.  $^1\text{H-NMR}$  spectrum of 4 in  $\text{DMSO-}d_6$ .

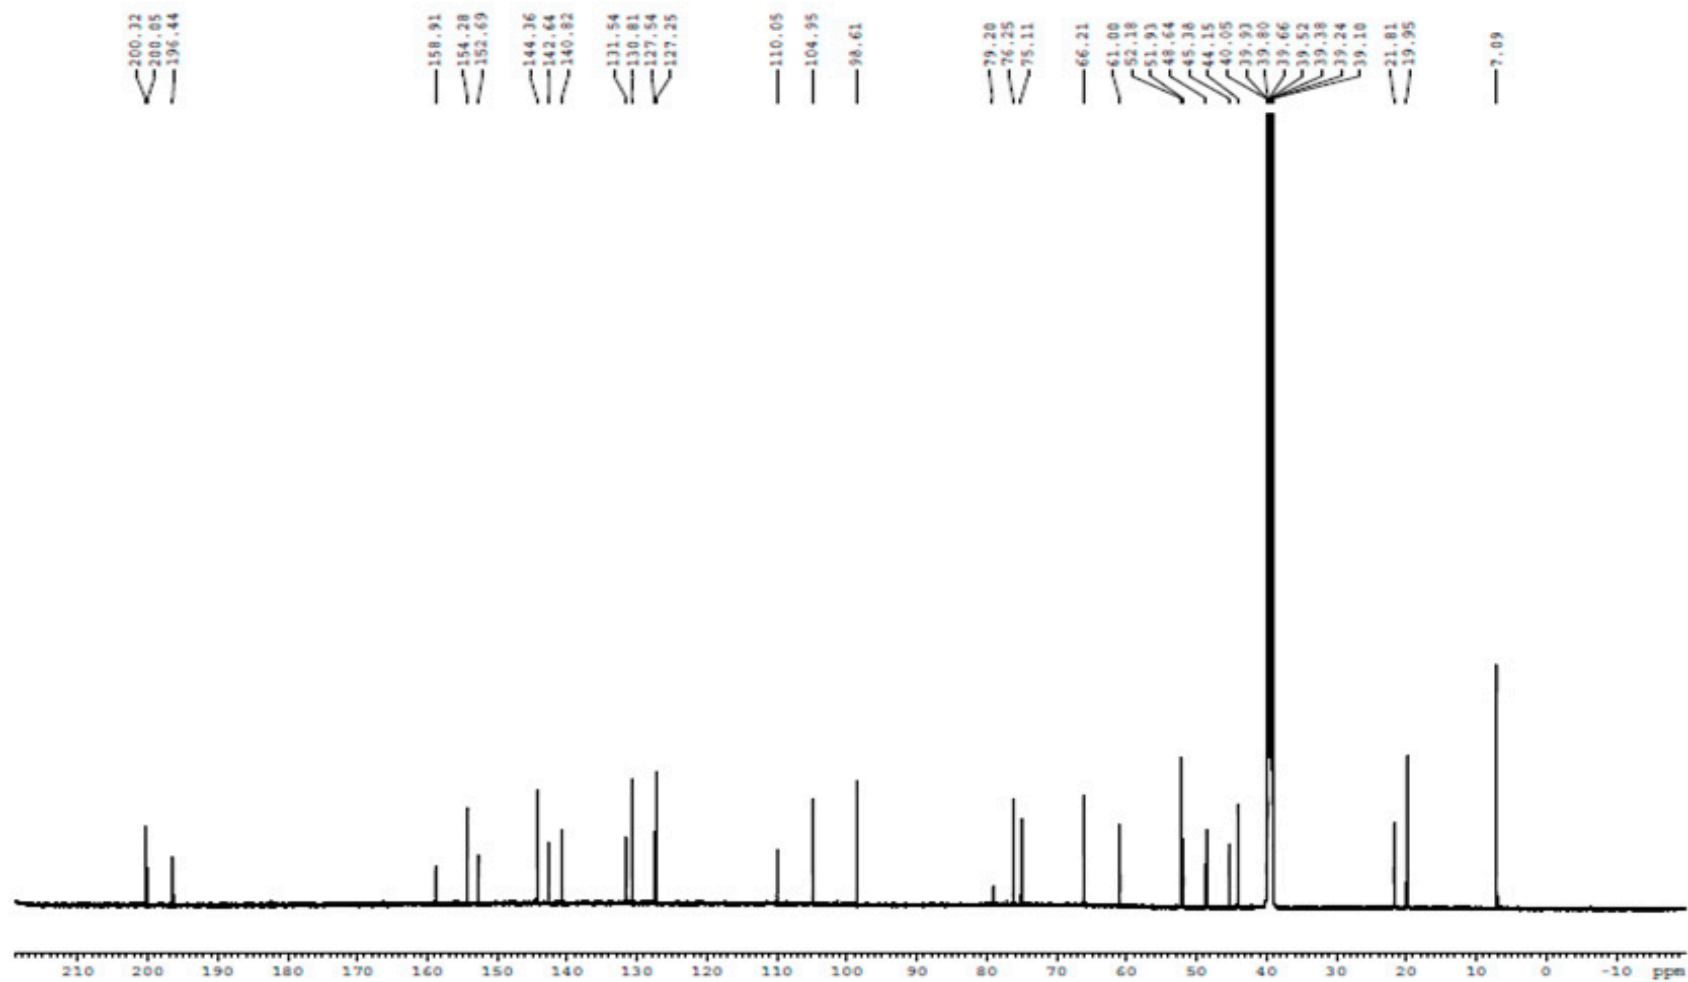

Figure S22. Cont.

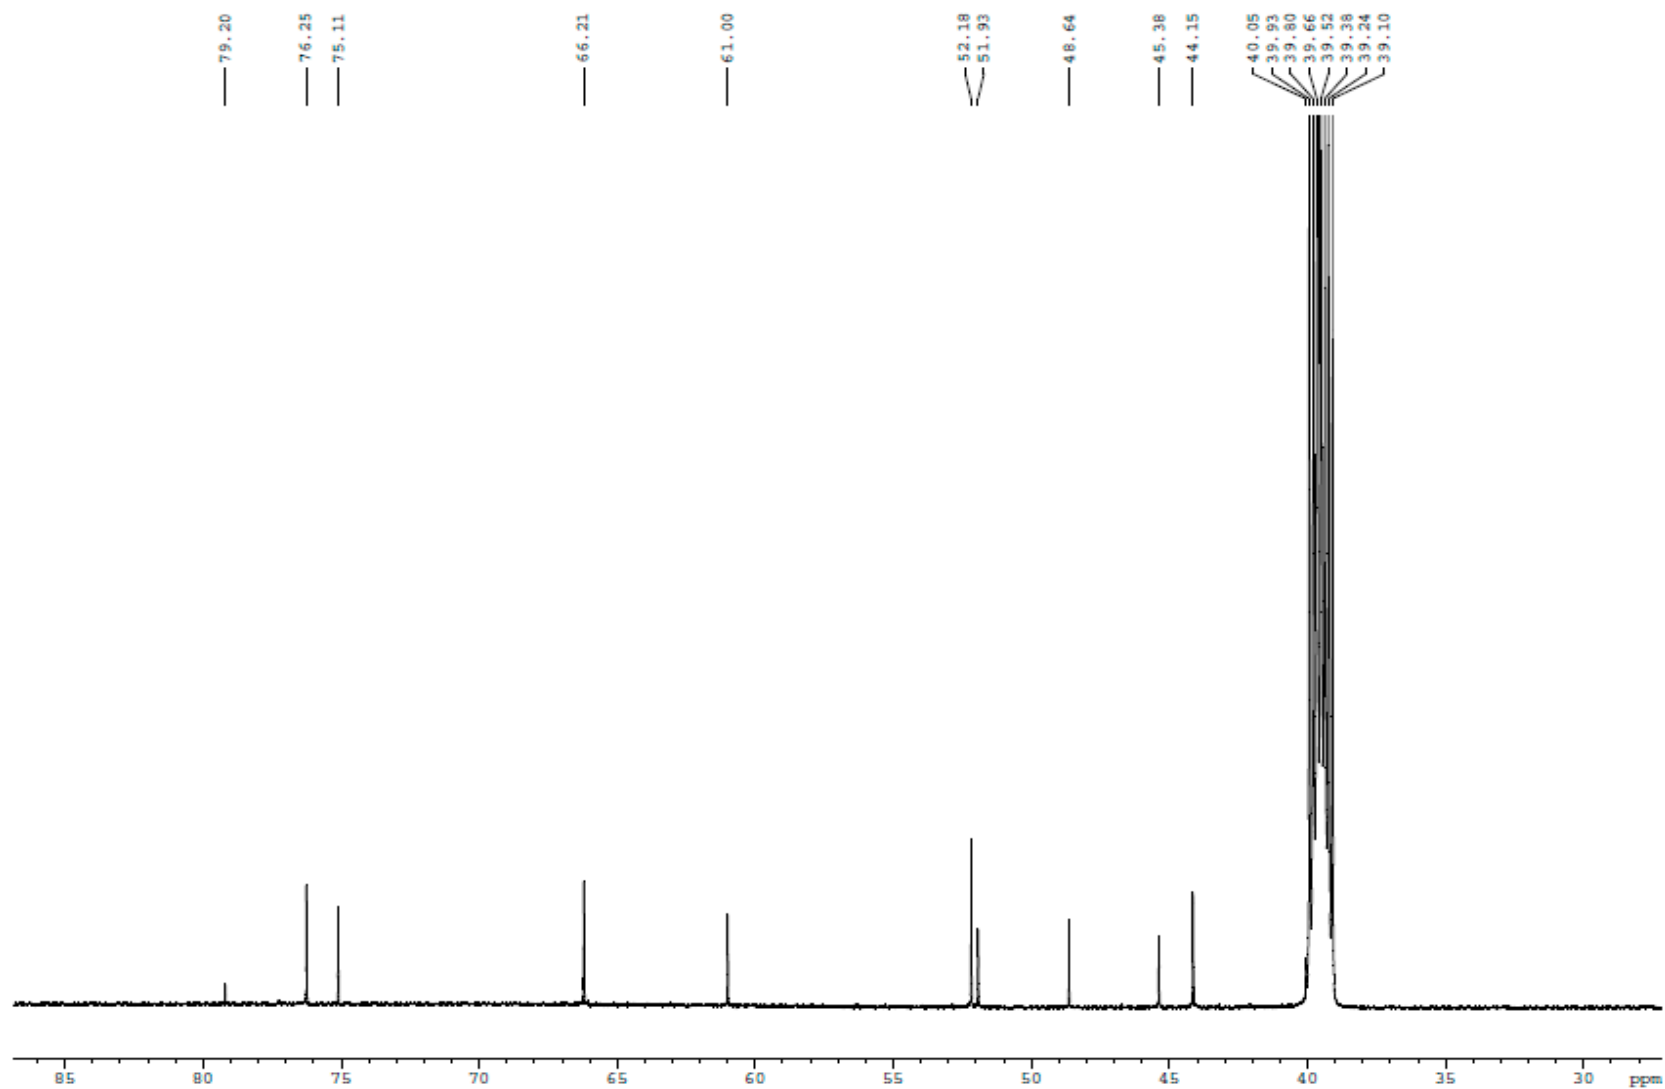

Figure S22. Cont.



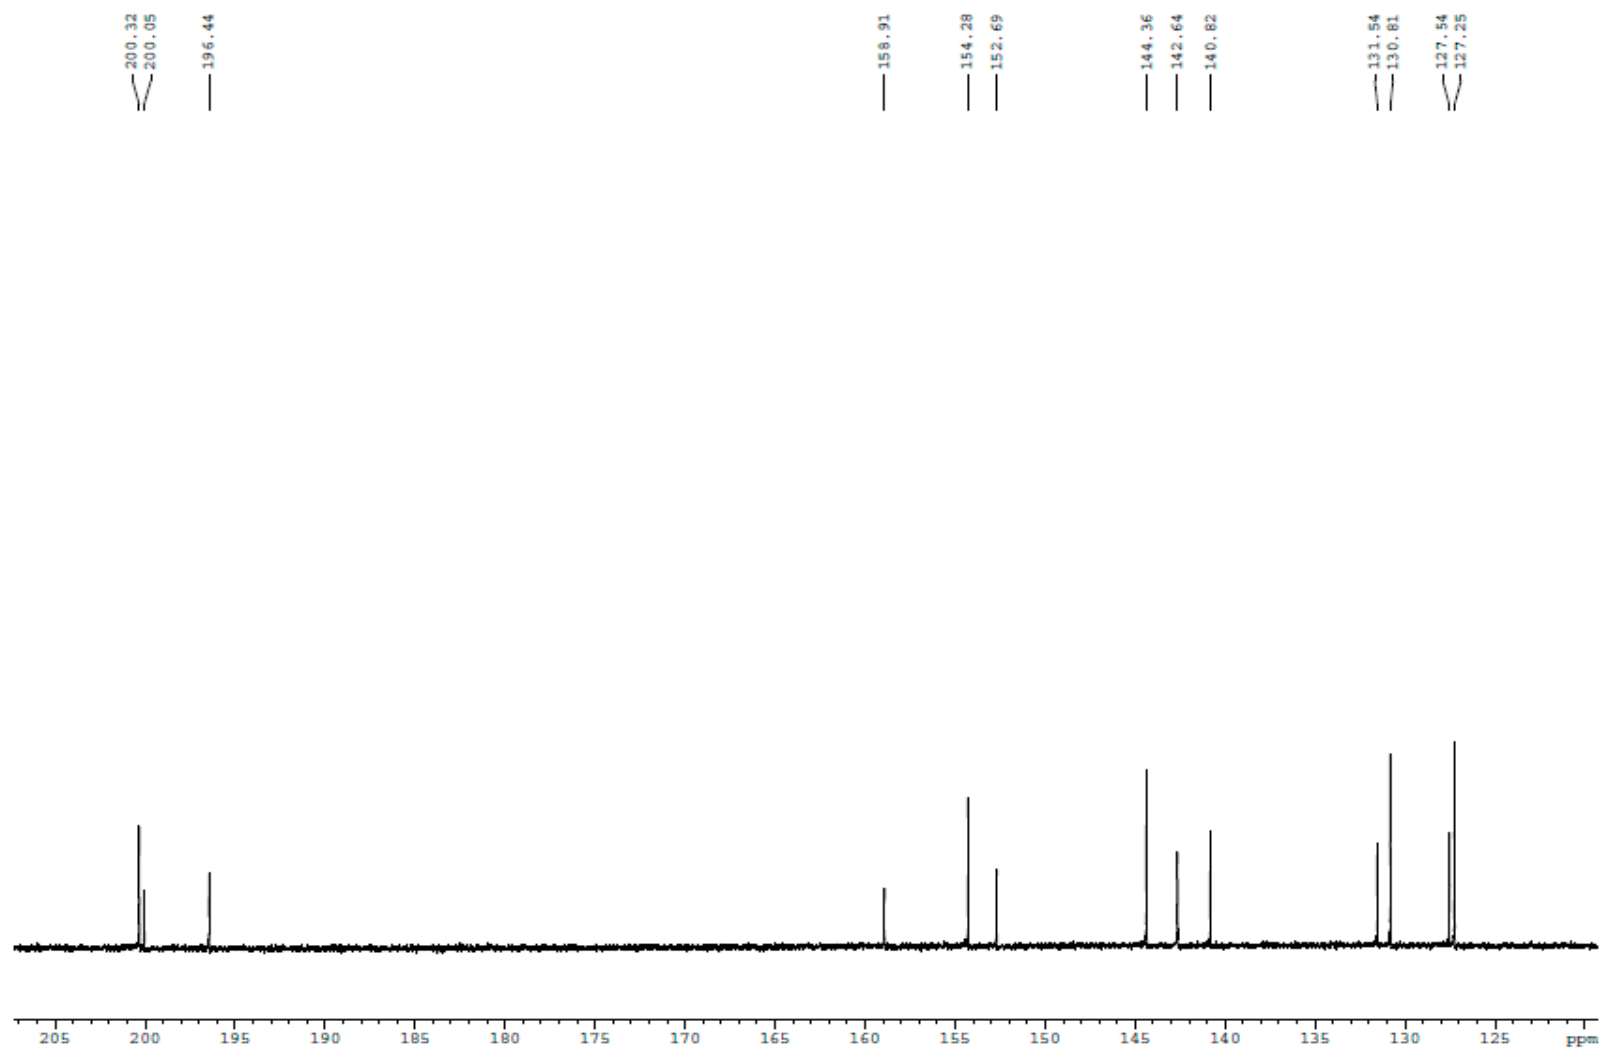

Figure S22. Cont.

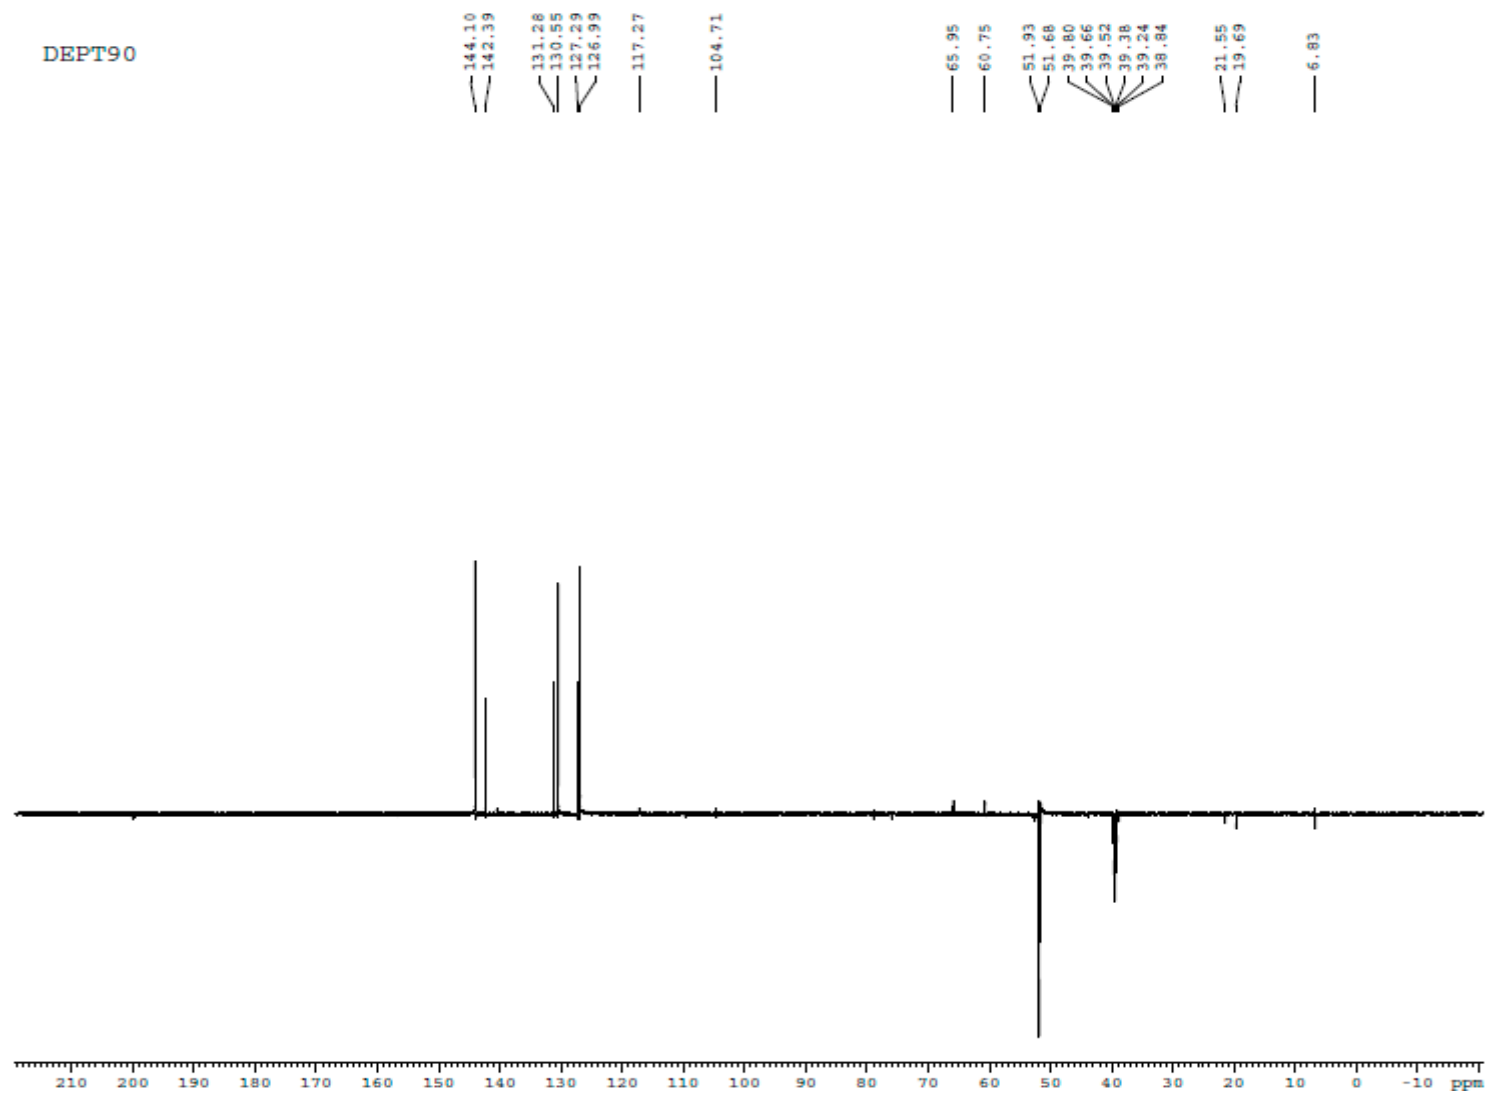

Figure S22. Cont.

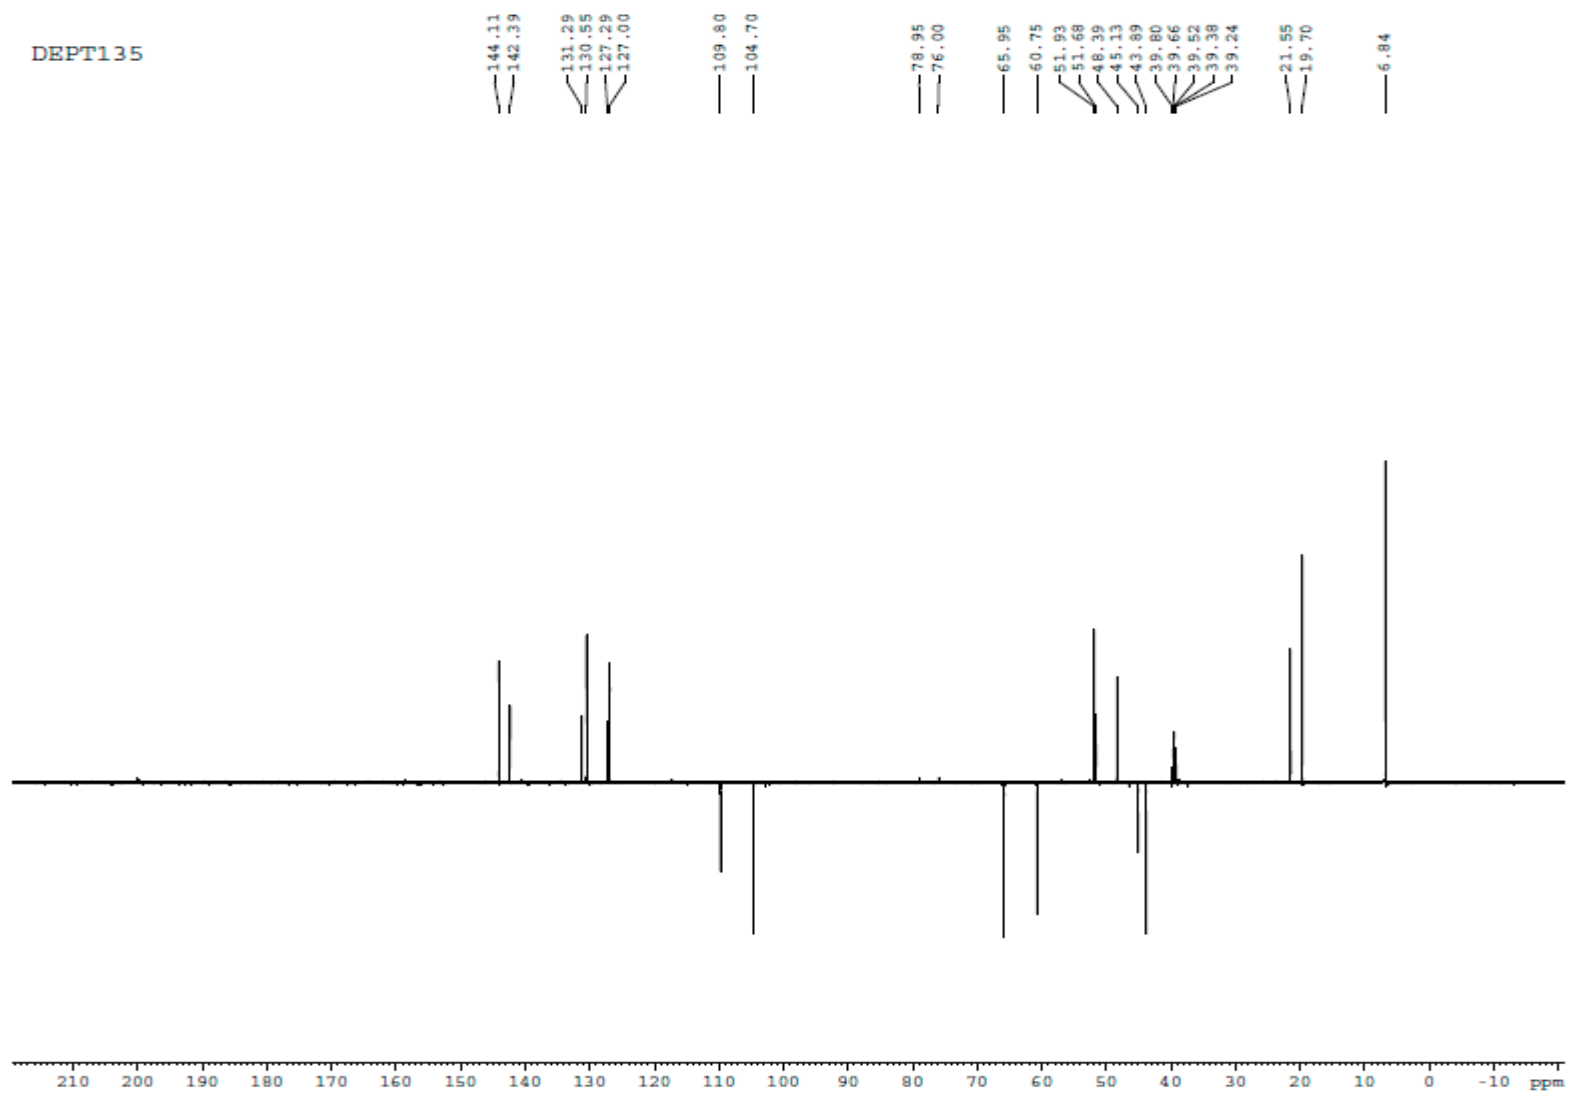

Figure S22.  $^{13}\text{C}$ -NMR spectrum and DEPT of 4 in  $\text{DMSO-}d_6$ .

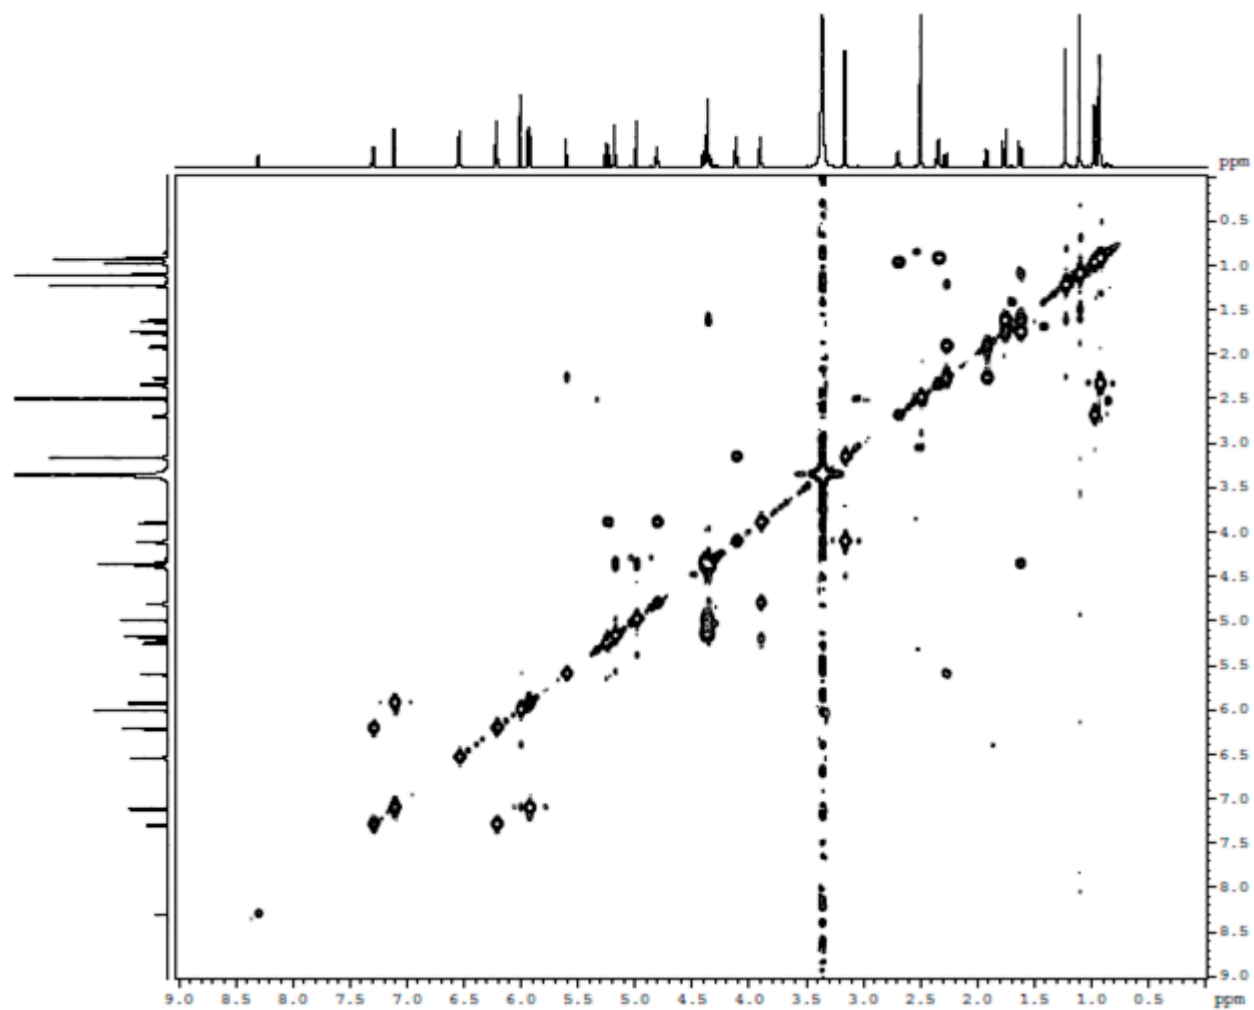

Figure S23.  $^1\text{H}$ - $^1\text{H}$  COSY spectrum of 4 in  $\text{DMSO-}d_6$ .

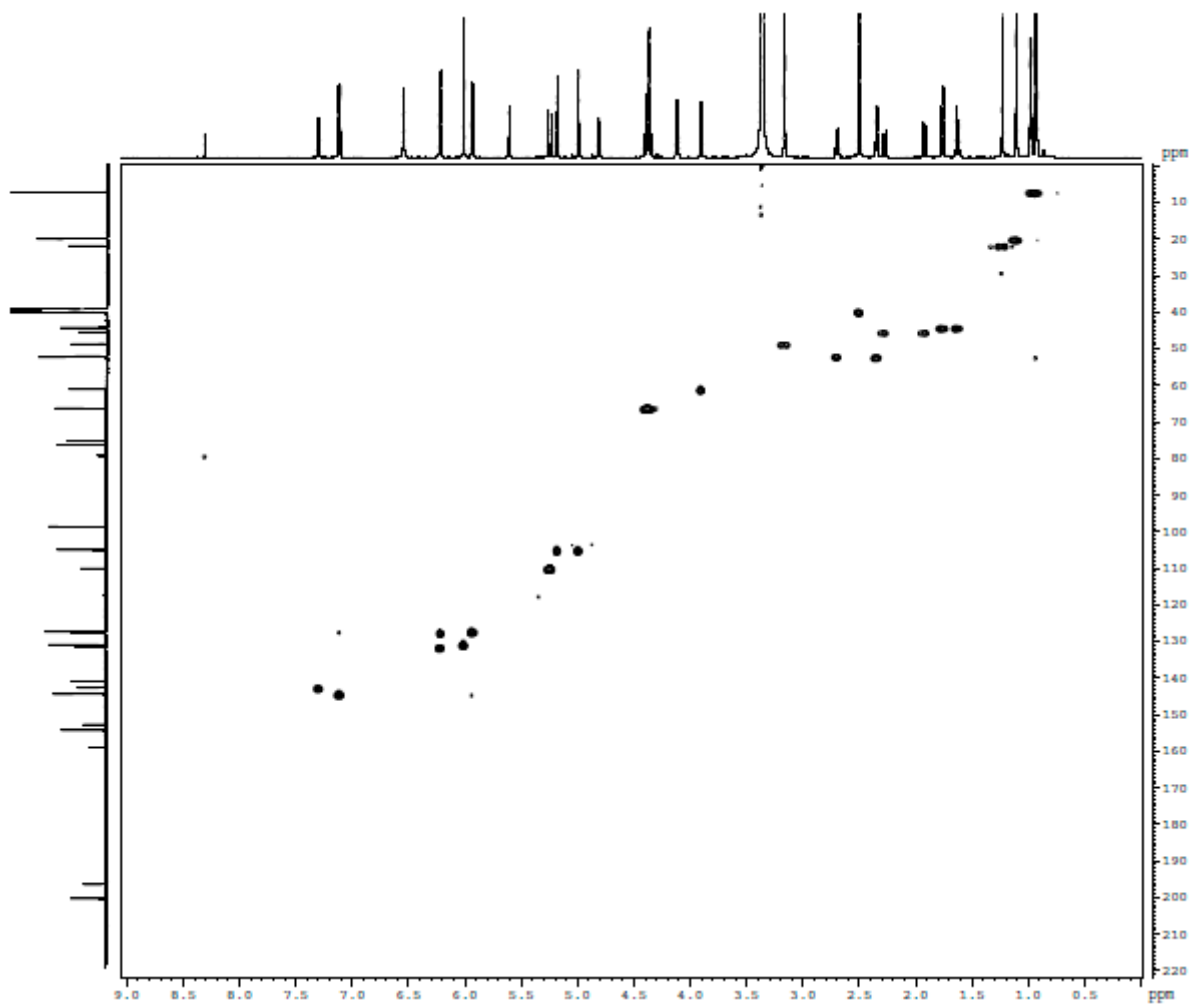

Figure S24. HSQC spectrum of 4 in DMSO- $d_6$ .

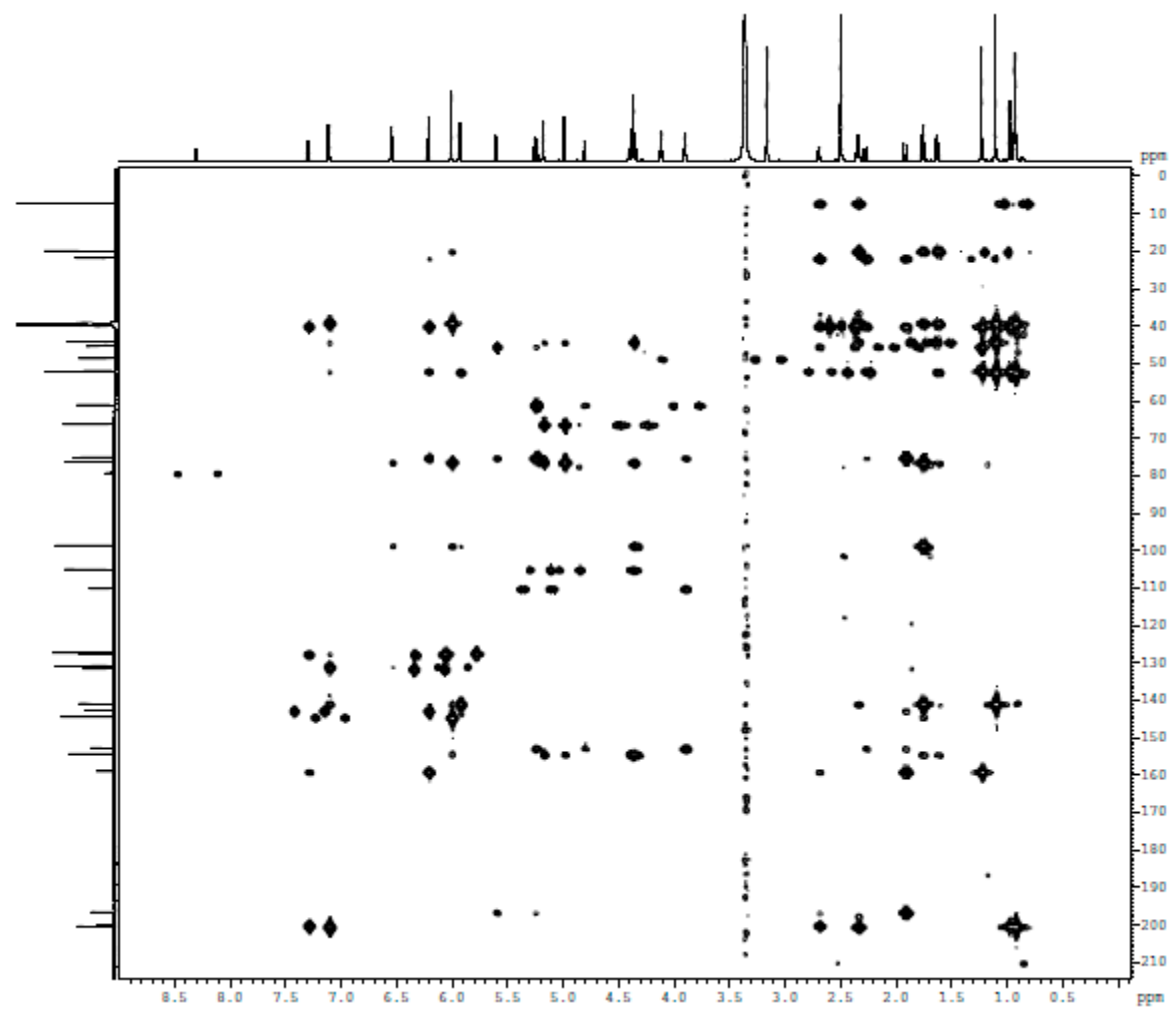Figure S25. HMBC spectrum of 4 in DMSO-*d*<sub>6</sub>.

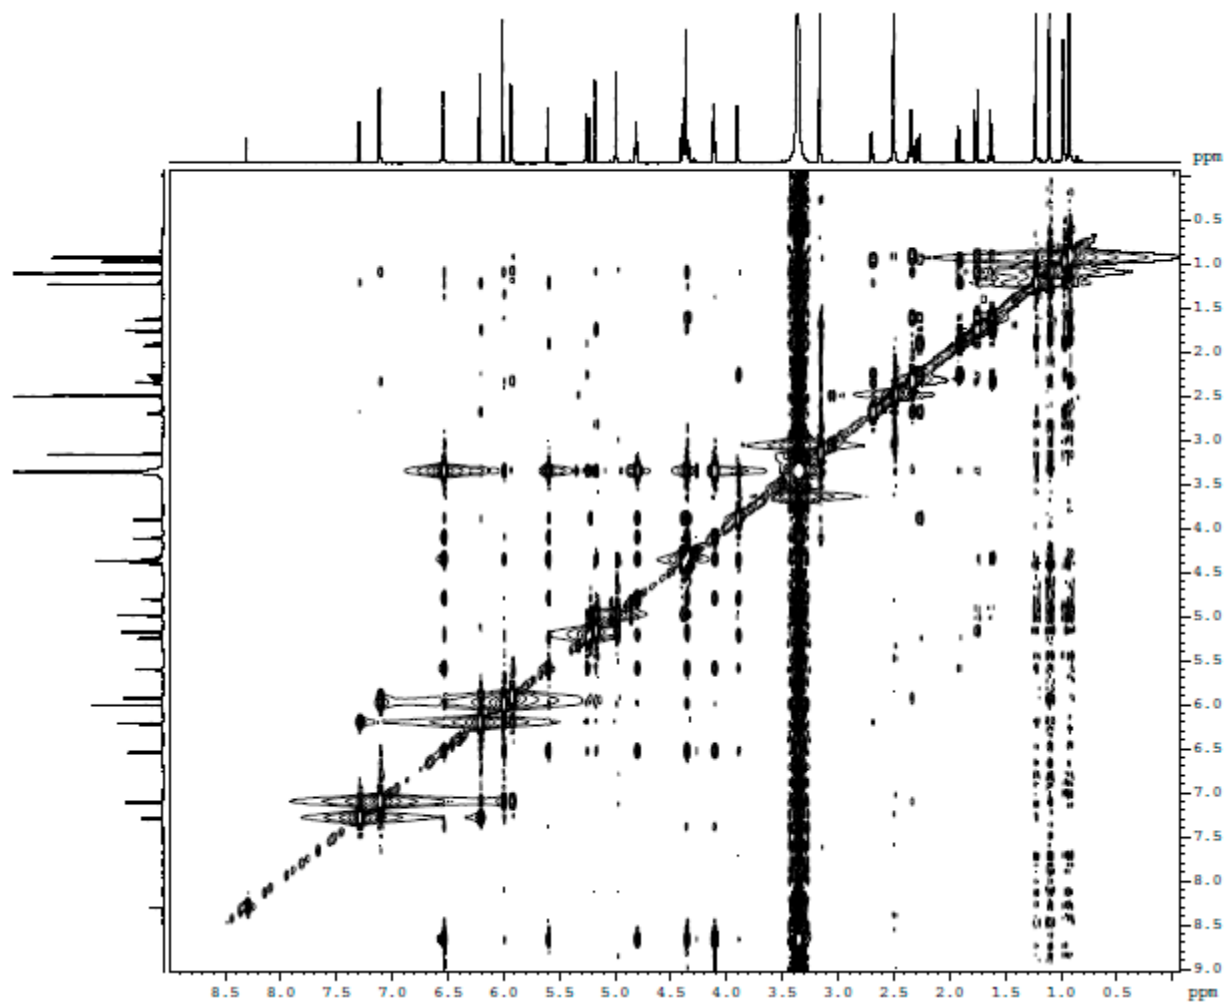

Figure S26. NOESY spectrum of 4 in DMSO-*d*<sub>6</sub>.

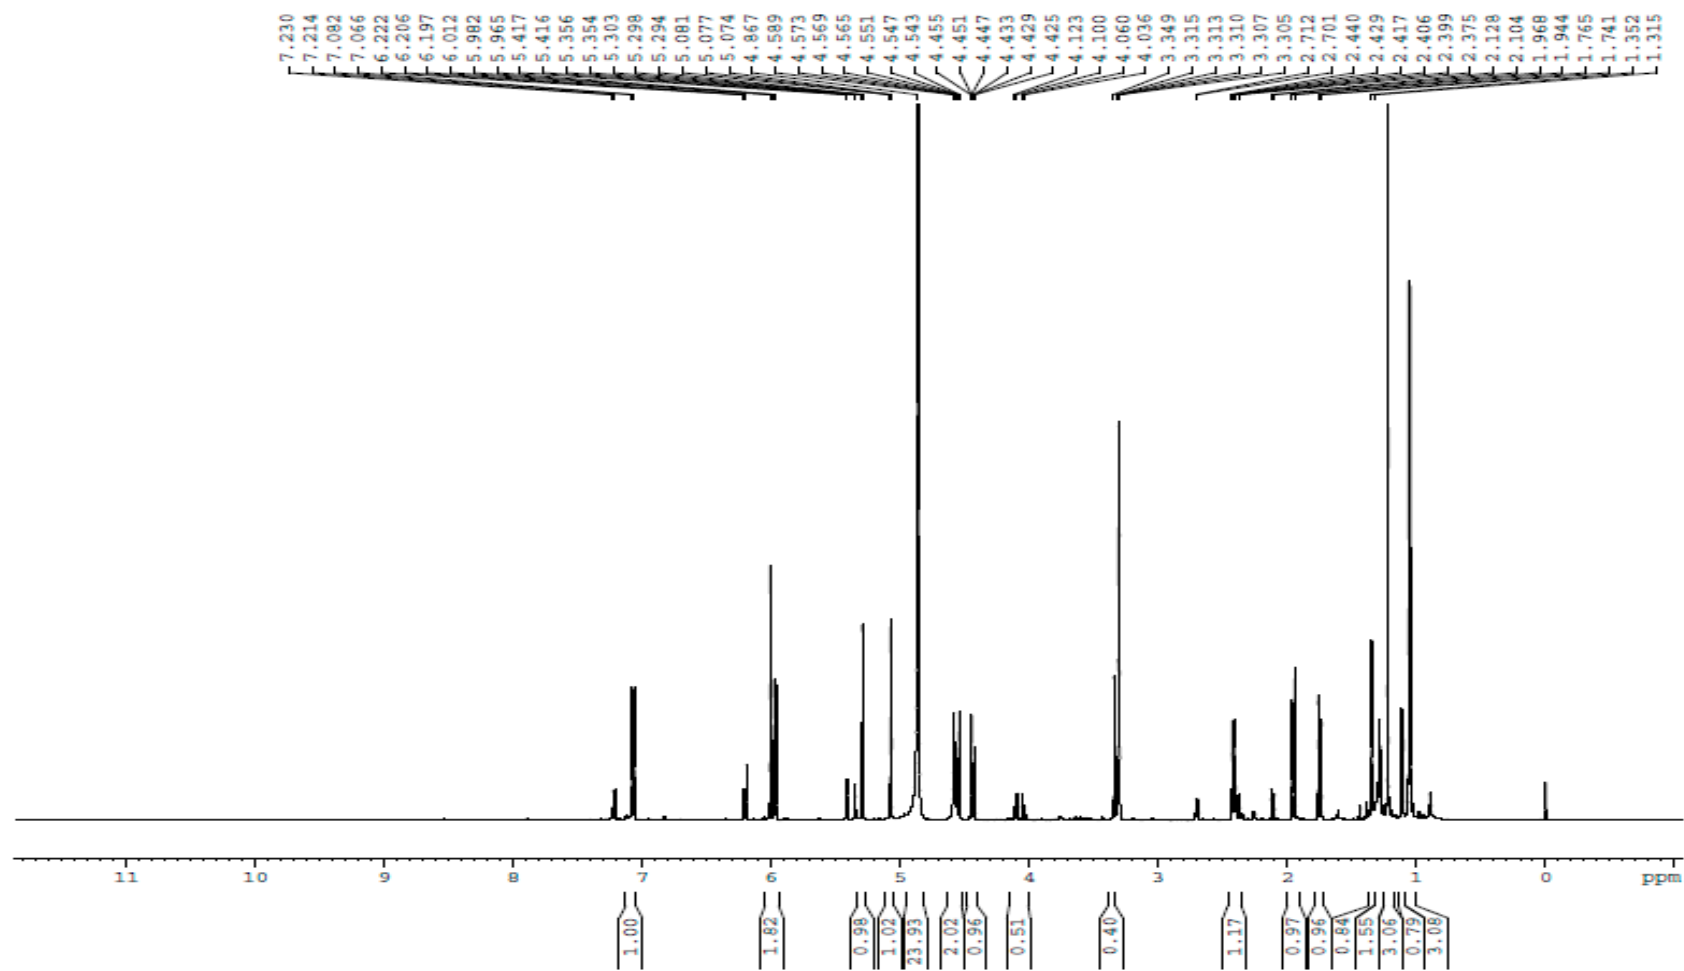

Figure S27. Cont.



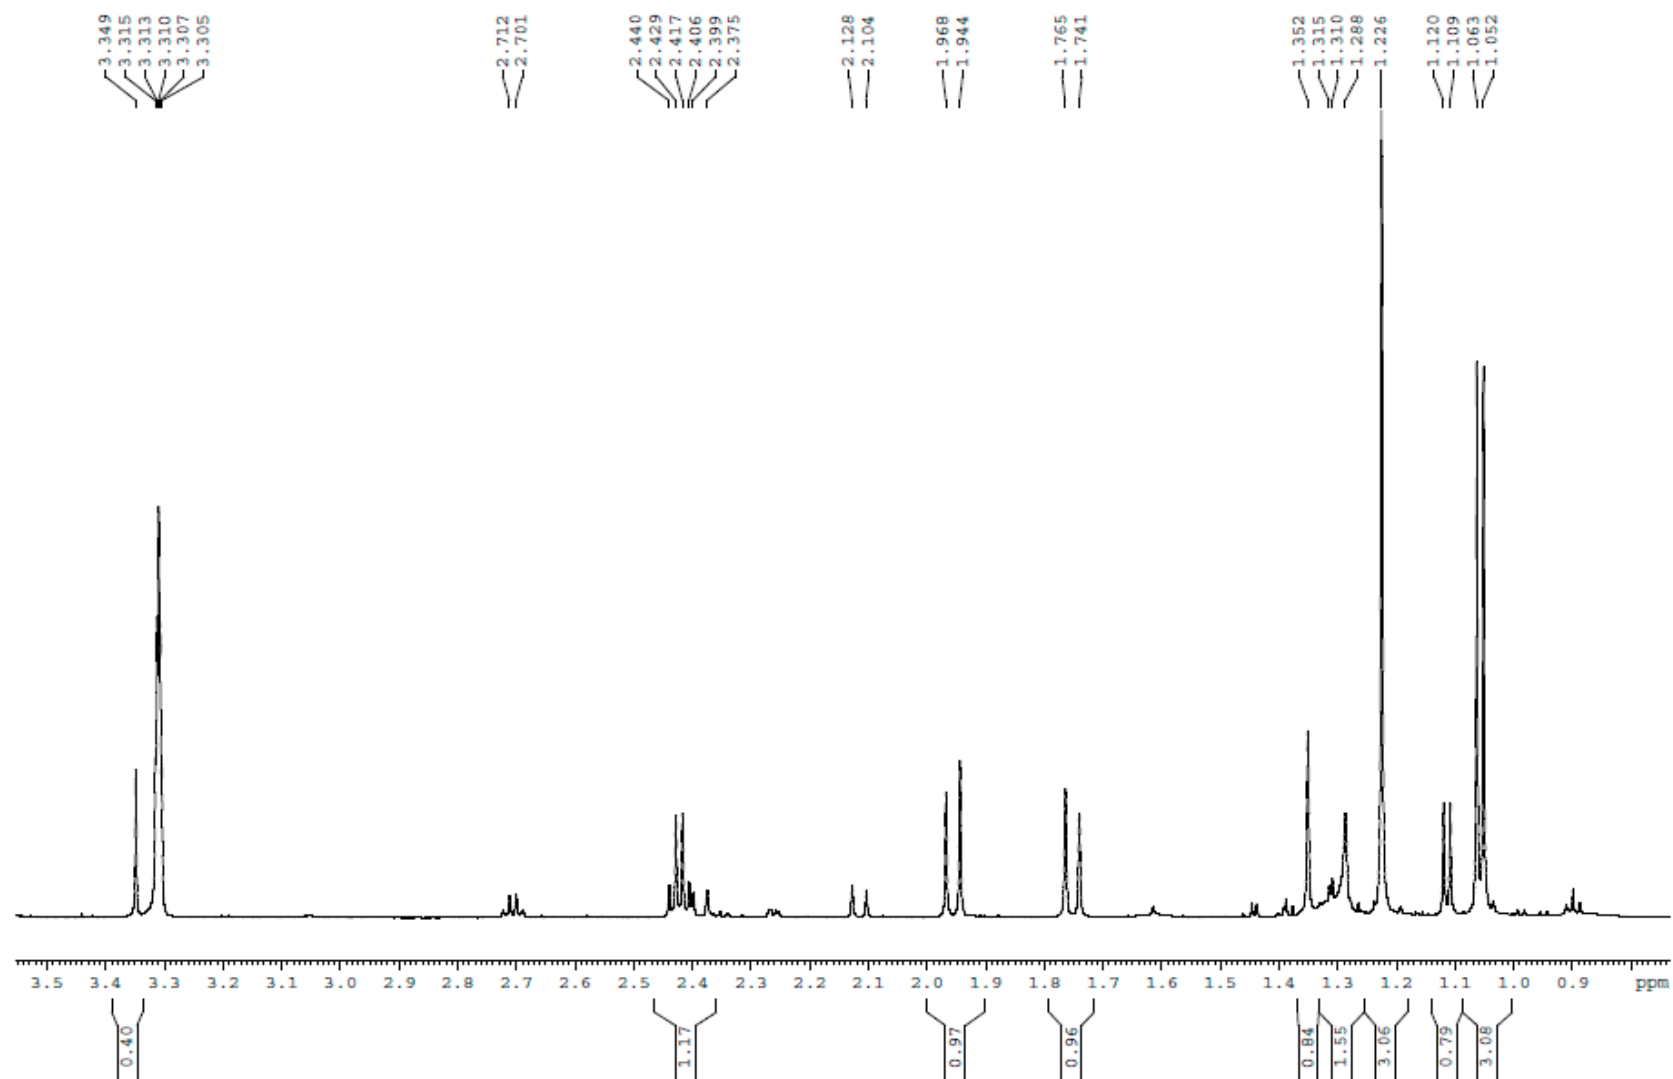

Figure S27. Cont.

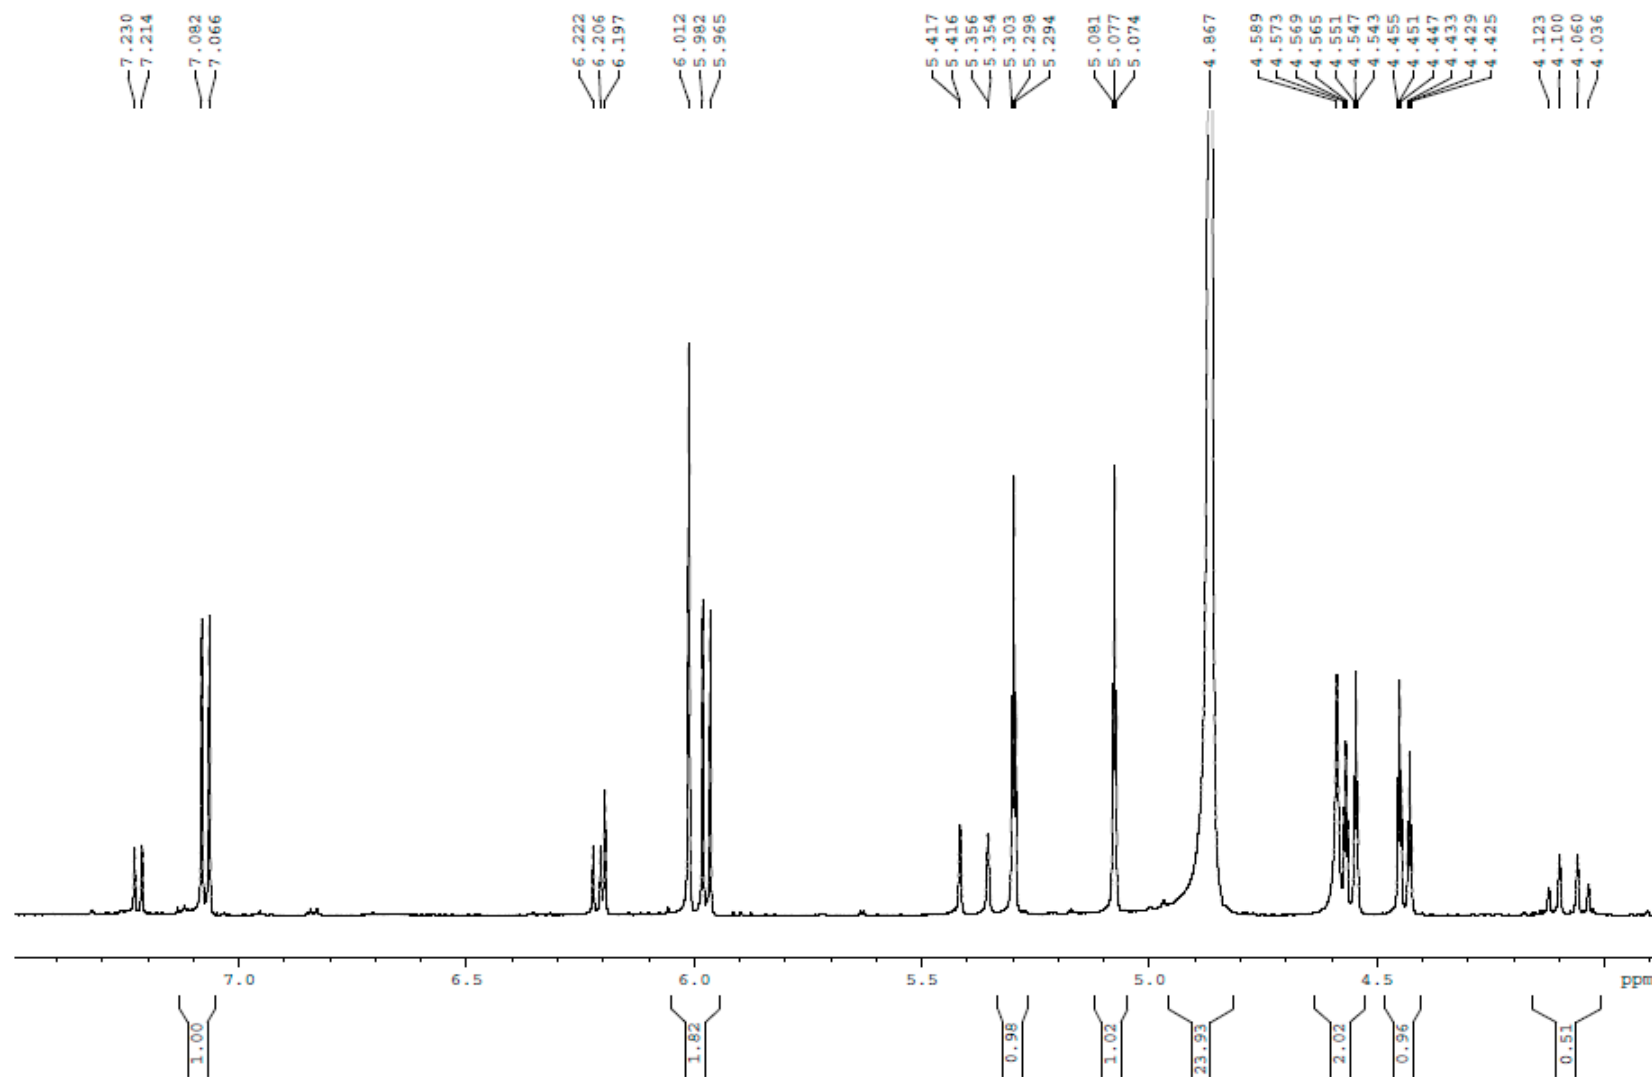Figure S27. <sup>1</sup>H-NMR spectrum of 4 in MEOD-d<sub>4</sub>.
